1 **Carbon dots boost dsRNA delivery in plants and increase local and systemic**  
2 **siRNA production**

3 Josemaría Delgado-Martín<sup>1,2</sup>, Alejo Delgado-Olidén<sup>1</sup> and Leonardo Velasco<sup>1\*</sup>

4 <sup>1</sup> Instituto Andaluz de Investigación y Formación Agraria (IFAPA), Centro de Málaga, 29140 Churriana,  
5 Málaga, Spain

6 <sup>2</sup> Universidad de Málaga, Spain

7 **\*Corresponding author**

8 Leonardo Velasco

9 Address: Instituto Andaluz de Investigación y Formación Agraria (IFAPA), Centro de Málaga, 29140  
10 Churriana, Málaga, Spain

11 E-mail: [leonardo.velasco@juntadeandalucia.es](mailto:leonardo.velasco@juntadeandalucia.es)

12

13

## 14 **Abstract**

15 Carbon dots (CDs) have been proposed for nucleic acid delivery in many biological applications. In  
16 this work we have obtained carbon dots by a hydrothermal synthesis method for developing  
17 nanocomposites with dsRNA. These CDs were produced using glucose or saccharose as the  
18 nucleation source and passivated with branched polyethyleneimines for conferring positive charges.  
19 Hydrodynamic analyses and transmission electron microscopy TEM showed that they sized on  
20 average 4 and 5 nm, depending on the sugar. The CDs were fluorescent and showed a peak at 468 nm  
21 when excited with UV light. Physicochemical characteristics of their surfaces were revealed by X-ray  
22 photoelectron spectroscopy (XPS) and Fourier transform infrared spectroscopy (FT-IR). The  $\zeta$   
23 potential determined that both types of CDs had positive charges as well as good electrophoretic  
24 mobility and conductivity. Coating of the CDs to dsRNA was efficient but did not protect from  
25 nucleases. DsRNA naked or coated with the CDs were delivered to leaves of cucumber plants by  
26 spraying at 2.5 bar. Quantitation of the dsRNA that entered the leaves showed that when coated with  
27 the CDs, 50-fold more dsRNA was detected than when naked dsRNA was applied. Moreover,  
28 specific siRNAs derived from the sprayed dsRNAs were 130 times more abundant when the dsRNA  
29 was coated with the CDs. Systemic dsRNAs were determined in distal leaves showing a dramatic  
30 increase in concentration when delivered as a nanocomposite. Similarly, systemic siRNAs were  
31 significantly more abundant in distal leaves when spraying with the CD-dsRNA nanocomposite.  
32 Furthermore, FITC-labeled dsRNA was shown to accumulate in the apoplast and increase its entry in  
33 the plant when coated with CDs. These results indicate that CDs obtained by hydrothermal synthesis  
34 are suitable for dsRNA foliar delivery in RNAi plant applications and provide insight into CD-  
35 dsRNA translocations.

36 **Keywords:** carbon dots, hydrothermal synthesis, dsRNA, delivery, RNA silencing, systemic RNAi,  
37 siRNA

## 38 **1. INTRODUCTION**

39 RNAi (RNA interference) refers to natural defense and regulatory mechanisms of gene expression  
40 that were discovered in nematodes in 1998, and since then great progress have been made in its study  
41 and applications in plant systems and other biological systems [1,2]. The presence of exogenous  
42 dsRNA (double-stranded RNA) elicits RNAi throughout the activation of the DICER and RISC  
43 complexes that process and use dsRNA as template for the degradation of complementary RNAs [3,

44 4]. In plants this biological process is known as PTGS (post-transcriptional gene silencing) and that  
45 includes the RNA-mediated transcriptional gene silencing (TGS) and the RNA interference (RNAi)  
46 and represents one universal defense mechanism by which plants cope with e.g. virus infections [5].  
47 The dsRNAs are processed by the RNAi machinery into small RNA molecules, the 21–24-nt short  
48 interfering RNAs (siRNAs) that in turn direct the targeting to homologous RNA molecules [6]. In  
49 recent years, RNAi and especially topical application of RNA in the form of dsRNA or siRNA is  
50 proving to be a promising tool in agriculture for the control of pathogens (viruses, fungi, insects), to  
51 be potentially included in biological control methods [7-11]. Once generated, the siRNAs move from  
52 plant cells through the plasmodesmata to other 10-15 neighboring cells, in a non-cell autonomous  
53 process [6]. In contrast, long RNA molecules (that include mRNAs, tRNAs and probably dsRNAs),  
54 move distantly through the phloem vessels and from here enter the cells again [12].

55 For the foliar application of any molecule to the plant, be it a pesticide, a biomolecule or a nutrient, a  
56 series of factors such as penetration, stability and diffusion in the plant must be considered. SiRNAs  
57 and dsRNAs have been applied in plants for gene silencing, fungal, virus and insect control [10]. In  
58 most cases these nucleic acids have been delivered naked, in aqueous phase or buffered [7]. There are  
59 examples of their application by spraying at higher or lower pressure [13,14] or mechanically  
60 [rubbing] with or without abrasives [15,16]. In the case of plant viruses, several successful cases of  
61 spray-induced RNAi control have been described [17], in general performed under laboratory  
62 conditions and more recently in greenhouse conditions [18]. The application of dsRNA or siRNA  
63 molecules on plants has also been considered with the aim of being sucked by the harmful insects  
64 that feed on them and thus exert a control effect by RNAi [8]. In all these situations, improving the  
65 amount of dsRNA/siRNA entering the plant and their internal diffusion will potentially improve their  
66 effectiveness and/or requiring a lesser quantity of them to be effective for RNAi.

67 Cell walls in particular, are structures of a fundamentally polysaccharide nature that, in addition to  
68 forming the physical structure of the plant cell by surrounding the cell membrane, act as a barrier to  
69 the diffusion of molecules, pathogenic organisms and other environmental agents, including  
70 nanoparticles (NPs) [19]. NPs due to their nanometric scale possess chemical, surface and  
71 photoelectric properties very different from the same materials at a larger scale that make them  
72 suitable for loading and controlled release of active compounds into the plant [20]. Thus, some  
73 authors have proposed the use of NPs to improve the delivery conditions of biomolecules to the  
74 cellular interior and to facilitate their release in a controlled manner [21,22]. For example, LDH  
75 nanoparticles have been used to facilitate or controllably release biomolecules including DNA and

76 dsRNA [13,23,24]. Mesoporous silica nanoparticles have facilitated DNA entry to the point of  
77 requiring 1000 times less DNA when bound to these nanoparticles than when released naked to exert  
78 gene silencing [25]. Nanoparticles derived of carbon dots (CDs) have facilitated the entry of siRNA  
79 into *N. benthamiana* 16c transgenic plants to produce systemic silencing in the plant [14]. On the  
80 other hand, the translocation of nucleic acid molecules once they are applied to the plant is as  
81 important or more important than the actual entry through the cuticle. It has been observed that NPs  
82 larger than the usually considered exclusion size of 5-20 nm are able to translocate to the apoplast  
83 [26]. However, other reports indicate that the exclusion limit in certain conditions could be higher  
84 than this [19]. Undoubtedly, nucleic acid molecules coated with NPs exceeds this apparent exclusion  
85 limit. In any case, the translocation process of dsRNAs is poorly understood, and even more so the  
86 long-distance movements of these nanoparticles when bound to nucleic acids.

87 CDs are usually 1-10 nm in size allowing them to pass through the cell wall. Besides, they can be  
88 synthesized with positive charges allowing them to electrostatically bind nucleic acids, including  
89 dsRNA, have low polydispersity index and result biocompatible showing low toxicity [14,27]. There  
90 are two general methods for CD synthesis, referred as "Top-down" which is characterized by the  
91 cleavage of graphitic materials to form CDs, and "Bottom-up" which consists in the polymerization  
92 using small carbon-containing molecules as precursors [28]. "Bottom-up" methods are, in general,  
93 more accessible and include different methods to carry out CD synthesis such as solvo hydrothermal  
94 synthesis, in addition to synthesis by electrochemical methods, microwave-assisted synthesis or laser  
95 ablation [29]. In order to obtain positively charged particles, different molecules can be used to  
96 passivate the CDs such as ethanolamine, ethylenediamine or the widely used polyethyleneimines  
97 (PEI), either during the process of CD synthesis or after the synthesis by electrostatic union. It has  
98 been reported how the passivation of PEI during the synthesis generates the incorporation of N to the  
99 CD backbone and NH<sub>2</sub> to the particle surface generating strong fluorescence and positive charges,  
100 respectively [27,30]. When exposed to UV light, and depending on their size, CDs emit fluorescence  
101 ranging from blue to red [31]. Other key characteristics of CDs are their good water solubility,  
102 chemical stability and resistance to photobleaching [32]. Free CDs are not cytotoxic at high  
103 concentrations but when passivated with PEI this threshold is significantly reduced, being an  
104 important feature to consider in biological assays [21]. CDs have found numerous applications in  
105 biomedicine and plant biotechnology. They have been used for MRI (magnetic resonance imaging),  
106 X-Ray and ultrasound bioimaging, targeted drug delivery, biomolecule delivery, biosensors and  
107 theragnostic [21,33].

108 In this work we have developed carbon dots to investigate the entry of CD-coated dsRNA into plants,  
109 its systemic movement and that of the derived siRNAs. This study focuses on synthesizing,  
110 characterizing and assessing the feasibility of glucose derived CDs for dsRNA delivery using  
111 cucumber plants as a model. We synthesized positively charged CDs using solvo hydrothermal  
112 synthesis with glucose or saccharose as carbon precursors and bPEI in order to passivate the surface  
113 and confer positive charges. We have carried out a complete physical and spectroscopic  
114 characterization of these CDs. In addition, we evaluated the CD-dsRNA binding capacity. Cucumber  
115 plants were sprayed with CD-dsRNAs in order to test the capacity of the nanocomposite to enter the  
116 plant with respect to naked dsRNA. For that, we investigated by RT-qPCR the presence of dsRNAs  
117 in proximal and distant leaves from the point of application. RNAi was also investigated to compare  
118 the effect of CDs in increasing the amount of local and distal siRNA products derived from the  
119 dsRNAs that entered the leaf.

## 120 **2. MATERIAL AND METHODS**

### 121 **2.1. Materials**

122 Glucose (G8270) and the 800 Da branched polyethyleneimine (408719) were purchased from Sigma-  
123 Aldrich (USA). Saccharose (131621) was purchased from Panreac (Spain). The 2,000 Da branched  
124 polyethyleneimine (06089) was purchased from Polysciences (Germany) and the 5,000 Da branched  
125 polyethyleneimine (Lupasol G100) was purchased from BASF (Germany). The seeds of cucumber  
126 (*Cucumis sativus* cv. “Bellpuig”) were purchased from Semillas Fitó (Spain).

### 127 **2.2. Synthesis of carbon dots**

128 Briefly, 2 g of glucose or saccharose were dissolved by strong stirring in 10 mL of double distilled  
129 water containing 2 g of branched polyethyleneimines (bPEI) of 800, 2,000 or 5,000 Da molecular  
130 weight. Next, the solution was transferred into a stainless-steel autoclave with a Teflon liner of 100  
131 mL capacity and heated at 120-180 °C for 4-6 h. After cooling to room temperature, the resulting  
132 dark yellow solutions were flowed through a 0.22 µm filter (Millipore, Merck, USA). The filtrates  
133 (10 mL) were then allocated in 1,000 Da molecular weight cut-off (MWCO) dialysis bags  
134 (Spectra/Por, Fisher) sealed with claps and dialyzed against 40 mL of double-distilled (DD) water for  
135 24 h in a 50 mL Falcon tube in agitation. The eluate was recovered, lyophilized and kept apart. Next,  
136 the bag was moved to a recipient with 2,000 mL of DD water and the dialysis was done after stirring  
137 for 24 h. After that, the water in the recipient was removed and changed for another 2,000 mL of DD

138 water and the dialysis continued for another 6 h. The content of the dialysis bags was then recovered,  
139 lyophilized, weighted and used for the subsequent analyses.

### 140 **2.3. Characterization of CDs and the nanocomposites**

#### 141 **2.3.1. Optical characteristics and measurement of quantum yield**

142 The ultraviolet–visible (UV–Vis) absorption spectrum of the CDs was recorded using the Multiskan  
143 GO microplate spectrophotometer (Thermo Scientific). The fluorescence measurements were  
144 performed using the FLS920 spectrofluorophotometer (Edinburgh Instruments) with a slit width of  
145 2.5 nm for both excitation and emission. The quantum yields, QY ( $\Phi$ ), were calculated with the 1-M-  
146 1 integrating sphere in the same equipment.

#### 147 **2.3.2. Morphology**

148 The morphology and size of the CDs were examined using transmission electron microscopy (TEM)  
149 with the FEI Talos F200X microscope. The hydrodynamic diameter of the particles in double  
150 distilled water were determined using the Zetasizer (Zetasizer Nano ZS, Malvern) using dynamic  
151 light scattering. The electrophoretic mobility of the particles was determined using phase analysis  
152 light scattering using the same instrument. The Zeta ( $\zeta$ ) potential was next derived from the  
153 electrophoretic mobility using the Hückel approximation.

#### 154 **2.3.3. Physicochemical characterization**

155 Fourier transform infrared (FT-IR) spectra were collected using the Tensor 27 spectrophotometer  
156 (Bruker, Germany) using a Gate Single Reflection Diamond ATR System accessory. A standard  
157 spectral resolution of  $4\text{ cm}^{-1}$  in the spectral range  $4000\text{--}400\text{ cm}^{-1}$  and 64 accumulations were used to  
158 acquire the spectra. X-ray photoelectron spectroscopic (XPS) analyses were performed on a Multilab  
159 System 2000 X-ray photoelectron spectrometer (ThermoFisher). Raman spectroscopy was done with  
160 the Raman Spectrometer-Microscope NRS 5100-JASCO. Excitation for Raman measurements was  
161 carried out by Nd:YAG laser with wavelengths of 325, 532 or 785 nm. For detection, the device  
162 included a thermoelectrically cooled CCD (Charge Couple Device) camera.

### 163 **2.4. *In vitro* synthesis of dsRNA**

164 Plasmid L4440gtwy, a derivative of L4440 that carries a double T7 promoter at both sides of the  
165 Gateway attR1/attR2 cloning sites was a gift from G. Caldwell (Addgene plasmid # 11344;  
166 <http://n2t.net/addgene:11344>; RRID: Addgene\_11344) and was kept in *E. coli* DB3.1. Plasmid  
167 pL4440-CP resulted from the Gateway cloning of a 464 bp segment of the coat protein (*cp*) gene of  
168 cucumber green mild mottle virus (CGMMV) [34]. The plasmid was used to transform *Escherichia*



169 *coli* strains Top10. Next, *E. coli* cells that contained pL4440-CP were grown in LB supplemented  
170 with carbenicillin (100 µg/mL) followed by plasmid DNA extraction with the High Pure Plasmid  
171 Isolation Kit (Sigma). For the *in vitro* synthesis, we linearized plasmid pL4440-CP in independent  
172 reactions with *Bgl*III and *Hind*III (NEB). Once linearized, the plasmid was purified and used as  
173 template in a single reaction for dsRNA synthesis using the HiScribe T7 High Yield RNA synthesis  
174 kit (NEB). For plasmidic DNA removal, the synthetic dsRNAs were treated with DNase I (Sigma)  
175 for 10 min at 37 °C and recovered by precipitation. After the synthesis, the dsRNA was heated at  
176 85°C and allowed to cool at room temperature. DsRNA quantitation was done with the ND-1000  
177 spectrophotometer (Nanodrop, Wilmington, USA) and examined in 2% agarose gels stained with  
178 RedSafe (Intron) under UV light.

### 179 **2.5. Characterization of CD-dsRNA nanocomposites**

180 The CDs were resuspended in MilliQ water and used to bind the dsRNA in water that it is immediate  
181 at room temperature. To characterize the interaction of the dsRNA and the CDs in the  
182 nanocomposites we used several approaches. The Zetasizer was used to measure the size, charge and  
183 electrophoretic mobility of the nanocomposites. Electrophoresis allowed the analysis of the migration  
184 in 2% agarose gels of the dsRNA, the CDs and the nanocomposites. Nuclease protection assays were  
185 performed with RNase A (Sigma) at 37 °C followed by gel electrophoresis.

### 186 **2.6. Application of dsRNA to cucumber plants**

187 Seeds of cucumber were sown after a preliminary soaking for 6 hours and transferred to pots in a  
188 growth room. When the seedlings had 2 fully expanded leaves, they were sprayed with naked dsRNA  
189 or CD-dsRNA using an artist airbrush at 2.5 bar. In each spraying, we used 3.5 µg of dsRNA or  
190 dsRNA combined with the CD in 1:1 (w/w) proportions. In other samples we used 1/10 diluted  
191 dsRNA or 1/10 diluted CD-dsRNA. These preparations were applied on 4 cm<sup>2</sup> in each leaf of the six  
192 plants (biological replicas) that were used in the assays. Plants were kept in the growth room at 25 °C  
193 and 16h/8h light/dark cycles. At 3 days post application (dpt), two points of the plant were sampled,  
194 the site where the spraying was made and a distal leaf that was previously covered with a foil to  
195 prevent the aerial arrival of the dsRNA.

### 196 **2.7. Long-(ds)RNA quantitation in proximal and distal parts of the plants**

197 Three days after the dsRNA treatments (dpt), a circular hole punch was used to obtain approximately  
198 100 mg of leaf tissue for the total RNAs extractions performed with the Trizol method. Six samples  
199 (biological replicates) in each condition were used for the analyses. The experiment was repeated  
200 twice and the results are from the average of the combined data. Total RNAs were quantified using

201 the NanoDrop ND-1000 (Thermo Fisher Scientific, Waltham, MA, USA). For the cDNA obtention  
202 we used 2 µg of the total RNA extract from each sample and the High-Capacity cDNA Reverse  
203 Transcription Kit (Applied Biosystems) using 10 pmol random nonamers (Takara) in 20 µl reaction  
204 volume and according to manufacturers' instructions. Each qPCR reaction (20 µl final volume), in  
205 triplicate, contained 1 µl of the cDNA, 10 µl of KAPA SYBR Green qPCR mix (KAPA Biosystems,  
206 MA, USA), and 500 nM each of primer CP197F (5'-TACGCTTTCCTCAACGGTCC-3') and  
207 CP305R (5'-GCGTCGGATTGCTAGGATCT-3'). In separate reactions, we included the primers for  
208 the *C. sativus* 18S rRNA as a reference. Specificity of the amplicons obtained was checked with the  
209 Bio-Rad Optical System Software v.2.1 by means of melting-curve analyses (60 s at 95°C and 60 s at  
210 55°C), followed by fluorescence measurements (from 55–95°C, with increments by 0.5°C). The  
211 geometric mean of their expression ratios was used as the normalization factor in all samples for  
212 measuring the quantification cycle (Cq). The relative expressions of the (ds)RNA amounts were  
213 compared based on the calculations done with the  $2^{-\Delta\Delta Cq}$  method.

## 214 **2.8. Quantitation of siRNAs in proximal and distal parts of the plant**

215 Detection and quantitation by RT-qPCR of the small RNAs derived of the dsRNAs was performed as  
216 described previously (18). In this section we evaluated the siRNAs derived from the sprayed dsRNAs  
217 product of the RNAi machinery in the plant cell. Briefly, the RNA extracted from the plant samples  
218 was polyadenylated with the poly A polymerase (NEB) and reverse transcribed using the primer  
219 polyT (5'-GCGAGCACAGAATTAATACGACTCACTATAGGTTTTTTTTTTTTTVN-3'), as  
220 described by Shi and Chiang, 2005 [35] and the High-Capacity cDNA Reverse Transcription Kit.  
221 The cDNA was then used to detect by qPCR the 6125-vsiRNA using the primer CG-6125 (5'-  
222 GCTAGGGCTGAGATAGATAATT-3') and the universal reverse primer (URP) (5'-  
223 GCGAGCACAGAATTAATACGAC-3'). Reaction and cycling conditions were described  
224 previously [18]. For the reference with an endogenous plant siRNA, we used the primer CUC5.8S  
225 based on the 5.8S rRNA of *C. sativus* (5'-CTTGGTGTGAATTGCAGGATC-3')[18]. Six biological  
226 replicas were included in each condition and the experiment was repeated twice. Each qPCR  
227 (technical repetition), including those for the 5.8S as internal control, was repeated three times. The  
228 specificity of the amplicons obtained was checked as above and the relative expressions of the  
229 vsRNAs were calculated as described above.

## 230 **2.9. FITC-Labeling of dsRNA and confocal microscopy of cucumber leaves**



231 For dsRNA labeling with the fluorochrome we followed the same dsRNA synthesis method  
232 described above but including fluorescein-X-(5-aminoallyl)-UTP (Jena Bioscience) in the reaction  
233 mix following manufacturer's instructions. Cucumber leaves treated with FITC-dsRNA were  
234 observed by laser scanning confocal microscopy (SP5 II, Leica). To observe the FITC signals, the  
235 excitation laser was set to 488 nm and the detection filter was set to 520 nm.

### 236 **3. RESULTS**

237 Our synthesis approach based on solvo hydrothermal reactions for the pyrolysis of carbon precursors  
238 (glucose and saccharose) allowed the obtention of carbon dots with different characteristics. The  
239 functionalization of the glucose and saccharose that have neutral charge, with bPEI that conferred the  
240 cations, and consequently the net positive charge, resulted in adequate CDs after the synthesis.  
241 Several bPEI of different molecular weights were tested that after physicochemical characterization  
242 made us the selection of a single range of bPEI sizes, times and temperatures of reaction, discarding  
243 the rest because of less fluorescence or formation of clumps after the lyophilization (not shown).  
244 Thus, the carbon dots that we selected for in-depth analysis in this work were obtained with glucose  
245 (gCD) or saccharose (sCD) and the 2 kDa MW bPEI (Supp. Fig. 1). We separated high molecular  
246 weight carbon dots using 0.22  $\mu\text{m}$  filtration and the precursors and small CDs with the 1 kDa MWCO  
247 dialysis membrane. The eluted CDs were in the range of 1-10 nm and were discarded in the  
248 subsequent studies for their irregular size distribution (see below). Further investigation was carried  
249 out to study the properties of the carbon dots retained in the dialysis bags and their evaluation in  
250 RNAi applications.

#### 251 **3.1. Physicochemical characteristics of the nanoparticles**

##### 252 **3.1.1. Optical properties of the CDs**

253 The UV-VIS absorption spectrum showed differences because of the different carbon precursor,  
254 reaction times, temperatures and carbon precursor:bPEI ratios. The spectra obtained with each carbon  
255 precursor for CD synthesis were different and depended on the time, proportion with the bPEI and  
256 reaction temperatures (Supp. Fig. 2). In all the cases, a maximum at 233 nm was observed, which is  
257 ascribed to the  $\pi$ - $\pi^*$  transition of C=C (30). Lower absorption in the spectra was observed when the  
258 temperatures and reaction times decreased, indicating probable lower efficiency in the synthesis of  
259 carbon dots. The higher the ratio carbon precursor:bPEI the higher the absorption, indicating a direct  
260 effect on CD synthesis efficiency. Another peak with maximum at 366 nm resulted in the case of the  
261 saccharose CDs, that was more than a peak, a shoulder between 300-350 nm in the glucose CDs. For

262 the subsequent analysis we selected the CDs obtained at 180 °C for 6 h in a 1:1 (w:w) ratio (carbon  
263 precursor:bPEI). These CDs were submitted to dialysis and the eluate and retained fractions were  
264 lyophilized and analyzed. The eluates differed in their absorption spectra because of the different  
265 molecular sizes (Fig. 1A). Both the eluate and the membrane retained CDs showed a similar color  
266 (dark yellow) and resulted fluorescent under UV light (Fig. 1A, inset). After the lyophilization the  
267 fraction retained in the exclusion membranes were weighted and used for the dsRNA  
268 nanocomposites in solution. Fluorescence spectra were measured as a function of the excitation  
269 wavelengths and showed maximum values at 468 nm (light blue) for the both the gCD and the sCD  
270 when excited at 350 nm (Fig. 1B). Amplitude of the peaks depended on the excitation wavelengths,  
271 ranging the increase of the emissions between 325-400 nm for both the gCD and the sCD. The  
272 analysis of the fluorescence signals for equal amounts of the nanoparticles in solution showed that  
273 the gCD were about 30% more intense that the sCD. The QY of the CDs resulted 1% for the sCD and  
274 2% for the gCD.

### 275 **3.2.2. Structural and morphological properties of the CDs**

276 Raman spectroscopy provided results that were difficult to interpret due to the high fluorescence of  
277 the samples (not shown). Therefore, the surface functional groups and chemical composition of the  
278 CDs were investigated by FT-IR and XPS. For both the gCD and sCD, FT-IR analysis showed in the  
279 high frequency region an intense and broad signal corresponding to the O-H bond stretching  
280 vibration around  $3435\text{ cm}^{-1}$  and bending vibration at (Fig. 1C). At lower energy, two weak signals  
281 appeared at  $2926$  and  $2852\text{ cm}^{-1}$ , compatible with C-H stretching vibrations with  $sp^3$  character. The  
282 intense signal that appeared at  $1629\text{ cm}^{-1}$  can be assigned to C=C bond stress vibrations with a certain  
283 degree of conjugation, although a contribution from C=O stress vibrations in amides could not be  
284 discarded. At  $1499$  and  $1458\text{ cm}^{-1}$  two signals appeared that could come from bending vibrations of -  
285  $\text{CH}_3$ . The signals at  $1384$  and  $1062\text{ cm}^{-1}$  could indicate the presence of C-OH and C-O-C groups,  
286 although the assignments in this region are difficult since vibrational modes of different functional  
287 groups that could be present in the sample overlap, such as, for example,  $\text{CH}_3$  and  $\text{CH}_2$  deformations,  
288 among others. The FT-IR analysis of the sCD resulted very similar to that obtained for the gCD (Fig.  
289 1C). In the  $1500\text{-}1300\text{ cm}^{-1}$  region, bands were much more resolved, although the frequencies do not  
290 vary, probably due to a higher concentration of compounds dispersed in the KBr matrix. Stretching  
291 vibrations for O-H and C-H could correspond to peaks at  $3435$  and  $2926/2920\text{ cm}^{-1}$ , respectively. A  
292 N-H bending vibration could be resolved at  $1630\text{ cm}^{-1}$  and other peaks at lower wavenumber could  
293 correspond to C-N and C-O-C vibrations [35-37]. It is worth mentioning that both FT-IR spectra of

294 both nanoparticles resulted very similar, being the only noticeable differences when focusing on the  
295 1200-1000  $\text{cm}^{-1}$  region, where for the sCD sample two signals appear to be resolved at 1160 and  
296 1051  $\text{cm}^{-1}$  (shadowed area in Fig. 1C). These signals might correspond to C-O/C-O-C bending.  
297 Regarding the XPS analysis, in both CDs, three strong peaks appeared at binding energies of 283.2,  
298 399.2 and 531.6 eV (Fig. 2), which could be associated with the C1s, N1s, and O1s, respectively  
299 [27,37,38]. The deconvolution of the C1s spectra (Fig. 2B and 2F) exhibited three peaks at 285.0,  
300 286.2 and 287.8 eV. The binding energy at 285.0 eV could correspond to the graphitic structure (C-  
301 C/C=C), the peak at 286.2 eV probably corresponded to C-N/C-O and peaks at 287.8 eV are  
302 generally associated with O-C=O (27,39,40). Deconvolution of the N1s spectrum displayed a peak at  
303 399.4 eV (Fig. 2C and 2G), that could correspond to amine or amide groups, as cannot be specifically  
304 resolved (39). Finally, deconvolution of the C1s spectrum showed peaks at 531.3 and 532.6 eV that  
305 could correspond to C=O and C-O vibrations, respectively (Fig. 2D and 2H). Besides, atomic  
306 concentrations were calculated (Table S1) and the N/C ratios resulted 21.9% and 22.6% for the sCD  
307 and gCD, respectively. Thus, both CDs seemed to be N-doped and exhibited hydrophilic groups on  
308 their surfaces.

309 The sizes of the CDs were estimated using the Zetasizer, that determined that the particles retained in  
310 the dialysis bags averaged 5 nm for the gCDs and 4 nm for the sCDs (Fig. 3A and 3C). The  
311 nanoparticles resulting from the eluate showed a less defined range of sizes (Fig. 3B and 3D). TEM  
312 provided additional evidence for the size of the gCD nanoparticles present in the fraction retained in  
313 the dialysis membrane (Fig 4A). Inspection of the gCDs at higher resolution (Fig. 4B) and Fourier  
314 transform analysis of the TEM images demonstrated that the gCDs had crystalline structure (Fig.  
315 4C).

316 On the other hand, the Zetasizer allowed the determination of the  $\zeta$  potentials of the colloidal  
317 dispersions of the nanoparticles, averaging 9.54 and 9.92 mV for the sCD and gCD, respectively,  
318 indicating electrostatic positive charges for both nanoparticles (Fig. 3E-H). These values are not very  
319 high and point out to some instability in the colloidal dispersion. The electrophoretic mobilities in  
320 deionized water resulted similar, being 0.74 and 0.77  $\mu\text{m cm V}^{-1} \text{s}^{-1}$ , for the sCD and gCD,  
321 respectively and the conductivities were 8.41 and 5.2  $\text{mS m}^{-1}$  for the respective gCD and sCD  
322 nanoparticles. Finally, the isoelectric points were 9.68 and 8.93, for the gCD and the sCD,  
323 respectively (Supp. Fig. 3).

### 324 3.2. Characteristics of CD-dsRNA nanocomposites

325 Binding of the CDs and dsRNA was done at room temperature and was quickly produced. The gCD-  
326 dsRNA and sCD-dsRNA nanocomposites showed an electrophoretic mobility of  $-1.56$  and  $-1.12 \mu\text{m}$   
327  $\text{cm V}^{-1} \text{s}^{-1}$ , respectively, and their corresponding  $\zeta$  potentials were  $-7.7$  and  $-14.0$  mV that can be  
328 compared with the  $-26.0$  mV of pristine dsRNA in water (Fig. 5). Hydrodynamic diameters of the  
329 nanocomposites were higher than the corresponding to the nanoparticles alone and resulted different  
330 to pristine dsRNA (Fig. 5). The dsRNA molecules in water suspension showed a range of sizes, with  
331 a major peak at  $45$  nm and two other peaks at  $1000$  and  $1400$  nm, probably indicating different  
332 arrangements of the molecules. Interestingly, when the nanoparticles were added, it resulted in single  
333 peaks for the nanocomposites of  $350$  and  $160$  nm of diameter for the gCD-dsRNA and sCD-dsRNA,  
334 respectively. On the other hand, for further analyzing the CD-dsRNA interactions, we performed gel  
335 retardation assays. Increasing the CD:dsRNA ratio resulted in higher retardation of the dsRNA in the  
336 agarose gels, indicating the progressive binding of the nanoparticles to dsRNA that increases the  $\zeta$   
337 potentials and consequently reduces the electrophoretic mobility of dsRNA to the positive electrode  
338 (Fig. 6A-B). Fluorescence of the dsRNA decreased as we increased the amount of CDs, probably  
339 because of the competition of the CDs with the RedSafe staining for intercalating in dsRNA  
340 molecules. A nuclease protection assay determined that the nanoparticles did not protect the dsRNA  
341 for the action of the RNase A (Fig. 6C). Moreover, coated dsRNA results degraded at lower  
342 nuclease concentration than pristine dsRNA. Conceivably, gCDs remain bound to degraded dsRNA  
343 fragments as their migration under the electrical current is reduced with respect to the RNase-  
344 degraded naked dsRNA. Finally, FITC-labeled dsRNA could also bind to the CDs as shown by  
345 retarded migration in the electrophoresis of gCD-\*dsRNA (Supp. Fig. 4).

### 346 **3.3. Detection of dsRNAs and siRNAs in the plants after spraying naked dsRNA or gCD-** 347 **dsRNA**

348 We prepared dsRNA for spraying on the plants both naked or in the form of nanocomposite coated  
349 with the gCDs. Typically, for the naked dsRNA and the nanocomposite we applied  $3.5 \mu\text{g}$  of *in vitro*  
350 synthesized dsRNA per leaf. For the nanocomposite, the same amount of gCDs was added. In  
351 addition, 10-fold dilutions of the dsRNA and the gCD-dsRNA nanocomposites were prepared. Three  
352 days after the spraying, leaves were washed thoroughly with distilled water and once the cuticle was  
353 dry, we collected the samples for the analyses. Next, we performed RNA extractions for the  
354 quantitation of long (ds)RNAs and the siRNAs derived from them. Analysis of the  $C_q$  values allowed  
355 calculating the  $\Delta C_{qCP-18S}$  for each of the four conditions (Fig. 7A). Calculation of the  $\Delta\Delta C_q$  between  
356 the different dsRNA preparations showed that in the gCD-dsRNA(1X) samples, the amount of

357 specific RNA exceeded 50-fold the amount present in the samples that were sprayed with naked  
358 dsRNA. When a 1:10 dilution of gCD-dsRNAs were sprayed on a group of plants and compared with  
359 a set sprayed with undiluted naked dsRNA, the amount detected in the plants were in the same  
360 magnitude order (Table 1). Regarding the vsiRNAs derived from the RNAi processing in the cell of  
361 the dsRNA, a comparison was performed (Fig. 7B). In this case, we observed that the 6125-vsiRNAs  
362 were 13.6-fold more abundant in the set of samples sprayed with gCD-dsRNA than with naked  
363 dsRNA (Table 1). Moreover, diluted gCD-dsRNA could produce in the leaves a similar siRNA  
364 amount that the undiluted dsRNA.

365 Systemic movement was also investigated by the detection and quantification of dsRNA and vsiRNA  
366 in a distal leaf that was prevented of spraying with a cover foil. In this case, the (ds)RNA detected in  
367 the leaves was  $1.2 \times 10^3$ -fold higher in plants sprayed with the gCD-dsRNAs with respect to naked  
368 dsRNA (Fig. 7C; Table 1). With respect to the derived siRNAs, consequence of the active RNAi  
369 machinery in the cells, they were also 12.4-fold more abundant in the distal leaves of plants sprayed  
370 with CD-dsRNAs (Fig. 7D). Remarkably, when comparing the dsRNA and vsiRNA in proximal and  
371 distal sites, it could be observed that the rates of distal versus local (ds)RNAs and vsiRNAs were two  
372 and one magnitude order higher when the dsRNA was coated with the CDs than with naked dsRNA,  
373 suggesting that coated dsRNA improved long distance movement (Table 1).

#### 374 **3.4. Detection of gCD-coated and naked FITC-labeled dsRNAs on cucumber plants using** 375 **confocal microcopy**

376 To further investigate the capability of gCDs for enhancing the dsRNA entry, we used FITC-labeled  
377 dsRNA that was applied either naked or coated with the gCD onto cucumber plants by using the  
378 spraying. Samples were observed under the microscope before and after strong washing of the leaves  
379 with DD water (Fig. 8). Strong fluorescence signals were observed in samples sprayed with naked or  
380 coated dsRNA\*FITC, however, after the washing step, only weak signals could be observed in  
381 samples sprayed with gCD-dsRNA\*FITC. Conversely, in samples sprayed with coated dsRNA\*FITC  
382 strong fluorescence signals remained, indicating that more dsRNA infiltrated consistently in the  
383 leaves. Furthermore, observations at higher resolution, showed that fluorescence signals mostly  
384 accumulated in the apoplast or in the cell walls (Fig. 9). Remarkably, when the gCDs were used, the  
385 fluorescence signals appeared well distributed in the leaves (Figs. 9C-9D). In contrast, when the  
386 leaves were treated with naked dsRNA\*FITC the fluorescence signals appeared in patches (Figs. 9A-  
387 B). The carbon dots could not be detected in confocal microcopy when illuminated at 405 nm or at  
388 lower wavelengths, probably because of their low fluorescence and quantum yield.



#### 389 4. DISCUSSION

390 In this work we have obtained carbon nanoparticles by hydrothermal synthesis that present  
391 characteristics such as small size and positive charges, that made them useful as dsRNA carriers to  
392 deliver into the plant cell and elicit the RNAi machinery. Obtention of carbon dots using bench  
393 devices facilitates the synthesis and research on the possibilities of these particles in biological  
394 applications. CDs have been obtained by microwave pyrolysis using domestic microwave ovens  
395 using polyethylene glycol and distinct saccharides such as glucose or fructose as precursors followed  
396 or not by dialysis [36,42]. Carbon dots were also obtained by microwave pyrolysis using citric acid  
397 passivated with PEI for siRNA binding [36,43]. The same method was used to obtain CDs using  
398 citric acid passivated with ethylenediamine followed by dialysis [44]. Nevertheless, domestic  
399 microwave ovens vary in power, which makes it difficult to homogenize the synthesis protocol  
400 [27,30,37,45]. Alternatively, hydrothermal synthesis seems to facilitate the standardization of  
401 protocols and made us to prefer this alternative method [46-48]. Solutions of citric acid and PEI have  
402 been subjected to pyrolysis in a Teflon lined autoclave at 100 °C for 2h, obtaining purified CDs after  
403 the dialysis with 0.5 kDa cut-off membranes [40]. In another example, citric acid and  
404 ethylenediamine were used for CD synthesis using hydrothermal pyrolysis with a Teflon lined  
405 autoclave followed by dialysis [39]. Thus, elemental carbon sources and passivation with molecules  
406 conferring positive charges such as PEI or ethylenediamine have been successfully used for obtaining  
407 CDs [27,40,49]. The physicochemical characteristics of the CDs obtained in this work resulted  
408 comparable to those described in the literature.

409 For the study of hydrodynamic diameter distributions, in addition to direct visualization with the  
410 TEM, we used the dynamic light scattering in the Zetasizer. In both CDs, dispersion sizes averaging  
411 4 nm and 5 nm were observed for the sCD and gCD, respectively. According to TEM, particle size of  
412 CDS from simple carbon sources vary 3-12 nm [30,38,40,43]. Although we observed particles  
413 exhibiting well-resolved lattice fringes as reported in the literature, there are some other particles  
414 where that pattern was not visible, as has been reported before [38,43]. This is generally explained as  
415 the non-crystalline PEI chains that are wrapped around the crystalline part of the particles making  
416 them undetectable. These small, fringe-free particles can be poorly visualized, and there is a  
417 possibility that our samples contain a proportion of these particles. Another explanation is that only  
418 the CDs oriented along specific directions and with the lattice planes large enough to be resolved by  
419 TEM allow observing lattice fringes [20].



420 In the absorption spectra, the peak at 300-350 nm could be attributed to the presence of particles of  
421 different sizes and the distribution of the different surface energy traps of the carbon dots [50]. The  
422 fluorescence spectra from the gCDs and sCDs resulted similar to those of CDs reported in the  
423 literature that were obtained using simple compounds [30,40,51]. In these examples, there is a  
424 maximum emission value around 460-470 nm when the samples are excited at 350-360 nm, similar  
425 to our results for the gCD and sCD. We have observed how the position of the emission peak shifts  
426 from blue to green as the excitation wavelength increases from 350 nm to 500 nm. Therefore, as our  
427 products showed fluorescence when illuminated with UV light, this was indicative of the presence of  
428 carbon dots, as none of the reaction precursors fluoresce when illuminated with UV light. The origin  
429 of the fluorescence of the carbon dots is still subject to debate, but the most accepted explanation  
430 accepts that when illuminated with ultraviolet light, electrons present in certain functional groups,  
431 such as C=O and C=N, are excited to a higher energy state and emit fluorescence in a coordinated  
432 fashion as they decay from the valence state [23,31,37,52].

433 According to the FT-IR analyses, our CDs showed peaks corresponding to the vibrations of the bonds  
434 between the C, O and N elements in our sample, very similar to the results obtained in other CDs that  
435 used different carbon precursors and synthesis methods [32,46,47,53]. In the XPS, the appearance of  
436 N1s peaks indicate that the N elements successfully entered the carbon skeleton of both the sCDs and  
437 the gCDs. In the C1s, the surface areas of the bands differed between the sCDs and the gCDs, being  
438 the corresponding to the 285 eV in the gCDs lower than the corresponding to the sCDs. Therefore, a  
439 higher proportional rate of C-N/C-O bending was present in the sCDs. Besides, the FT-IR analysis  
440 agreed with the XPS in the description of the functional groups present in the surfaces of the CDs.  
441 On the other hand, the  $\zeta$  potential, that resulted positive in both CDs, point out to the passivation of  
442 the bPEI as shown by the presence of N covalently bonded on the surfaces of the CDs. The quantum  
443 yield of the CDs obtained in this work resulted low, and although they were not intended specifically  
444 for bioimaging, it has been reported the use in cell labeling of CDs derived from glucose and PEI  
445 showing a QY of 3.5% [54].

446 CDs have been used in biomedicine for drug delivery [reviewed in: [48]] and bioimaging [30,43,46].  
447 When adequately passivated, they bind electrostatically to nucleic acids, and consequently have been  
448 used for NA delivery in living organisms [14,27,45,50,55-57]. Besides, CDs has been used to label  
449 DNA instead of commercial fluorophores [58,59]. When synthesizing this type of particles, we  
450 observed that they resulted suitable for our objective, as there was an effective binding between the  
451 nanoparticles and dsRNA. This was evident when dsRNA bands delayed with respect to their

452 corresponding position, either because the binding of the particles makes the molecule heavier, so it  
453 was expected to migrate less in the gel, or because the positive charges of the CDs offer resistance to  
454 migration towards the positive pole of the gel. Besides, measurement of hydrodynamic diameters  
455 showed different sizes for the nanocomposites and their separate components. In another report,  
456 plasmid DNA formed a complex with arginine and glucose-derived carbon dots obtained by  
457 microwave pyrolysis [45]. The CD-pDNA complex increased the diameter to 10-30 nm with respect  
458 to the 1-7 nm of the CDs, as determined by the Zetasizer. Our CD-dsRNA nanocomposites showed  
459 larger diameters, probably because the linear nature of the dsRNA molecules versus the circular  
460 plasmid DNA. Chitosan- and quaternary chitosan derived CDs has been used to form complexes with  
461 dsRNA for shrimp virus control [60]. The nanocomposites varied in size between 350-650 nm and  
462 150-350 nm, depending on the CD:dsRNA ratios. Progressive increase of the Zeta potential was  
463 observed when increasing the CD:dsRNA ratio, being positive at ratios higher than 1.7:1 in chitosan-  
464 dsRNAs and 0.24:1 in quaternary chitosan CD-dsRNAs [60]. In our CD-dsRNA complexes, we have  
465 observed that ratios higher than 10:1 were positive. The gCDs-dsRNA used in this work for plant  
466 transfections were electronegative, as we used a 1:1 ratio in the composition. Wang and co-workers,  
467 2014[27] obtained citric acid and PEI-derived CDs for siRNA binding. The hydrodynamic particle  
468 sizes of the CDs resulted 3.9 nm and 4.7 nm for the CD-siRNA complex and the zetapotential was  
469 positive both for the CDs and the CD-siRNA, used for human cell transfections. Binding to plasmid  
470 DNA has been achieved with microwave pyrolysis synthesized CDs derived from glycerol and PEI  
471 [61]. The CD-pDNA particles were 200 nm in size. CDs are reported to protect siRNAs from RNase  
472 [14,61]. However, we did not observe protection from RNase A by the gCDs on the dsRNAs,  
473 suggesting that gCD-coated dsRNAs are fully accessible to plant RNase III, effectively triggering  
474 the RNAi response and siRNA production. This assumption is supported by the abundant siRNAs  
475 detected in plants sprayed with gCD-dsRNA.

476 Regarding their application in plants, we have selected for our research the gCD nanoparticles for the  
477 obtention of the dsRNA nanocomposite formulations as they showed higher fluorescence and  
478 quantum yield, better solubility and higher electrostatic charge than the sCDs. Once the spraying  
479 experiments were carried out, it could be observed how a three-magnitude order higher amount of  
480 dsRNA entered the plants when coated with the gCDs. Once in the plant, the dsRNA was capable of  
481 eliciting the RNAi machinery and its processing into siRNAs. The amount of siRNA produced was  
482 50-fold higher in leaves sprayed with coated dsRNA. In distal leaves that were prevented to reaching  
483 the spraying of dsRNA, we could detect both dsRNA and siRNAs, evidencing systemic movement.

484 Remarkably, a three-magnitude order more dsRNA and one-magnitude order siRNA was detected in  
485 distal leaves of plants sprayed with coated dsRNA in comparison with naked dsRNA. Therefore,  
486 carbon dot coated-dsRNAs may be effective in inducing local or systemic silencing, by requiring  
487 smaller amounts than naked dsRNA.

488 Although to our knowledge no other reports of quantitation of dsRNAs and vsiRNAs when applying  
489 CD-dsRNA have been reported, other authors describe more efficient siRNA release in plants when  
490 coated with CDs. An increase in local and systemic GFP silencing has been reported when applying  
491 siRNA coated with carbon dots in *N. benthamiana* 16c, but only when surfactants were included in  
492 the formulations [14]. Alternatively, siRNAs coated with carbon dots produced systemic GFP  
493 silencing in *N. benthamiana* 16c when sprayed with high pressure on the leaves [56], to the point of  
494 damaging them. In our case, the pressure exerted when inoculating to obtain satisfactory results was  
495 medium, without damaging the leaves. Hence, the more effective local and systemic silencing of  
496 GFP expression observed in 16c plants when siRNA is delivered as CD-nanocomposites [14] can be  
497 explained in terms of higher amount of siRNA available and the possible improvement of systemic  
498 movement of the coated RNAs, as results from our research. Although systemic GFP silencing has  
499 been so far observed only in *N. benthamiana* 16c plants [62], we and others have shown that virus-  
500 derived dsRNAs, or at least long RNA molecules, moves systemically in the plant, and result  
501 subjected to the RNAi machinery producing siRNAs and lead to symptom reduction after virus  
502 inoculation [16,18,63]. Thus, improving delivery methods for siRNA/dsRNA in foliar application  
503 will either decrease the amount of dsRNA needed or improve its effectiveness. On the other hand, we  
504 have shown that free and CD-coated FITC-dsRNA can cross the cuticle of cucumber plants and  
505 accumulate primarily on the outside of the cell, the apoplast. Leaf washes showed that a large amount  
506 of naked dsRNA-FITC resulted lost and therefore does not enter the plant as reported in *N. tabacum*  
507 [13]. LDHs conjugates also improved internalization of plasmid DNA into human cells [24].  
508 Therefore, nanoparticles, either LDHs or CDs enhance the entry of dsRNA in the plant and reduce  
509 washing losses, increasing the efficiency of the topical spraying process. Further research is currently  
510 underway to investigate the movement to other growing parts of the plant and the stability over time  
511 of the sprayed CD-dsRNA. Recently, in a preprint report, it has been shown that unprocessed dsRNA  
512 molecules accumulate in the apoplast and move to distal parts of the plant [64]. Another important  
513 area of research is the improvement of the application of nanoparticles and their conjugates, via the  
514 development of formulations that in some cases can employ surfactants and other additives to  
515 improve the permeability of plant cell membranes [19]. However, in certain applications such as

516 virus control, the use of permeabilizers can contribute to the opposite effect, i.e., favor virus  
517 movements within the plant (L. Ruiz, D. Janssen, pers. comm.). Nevertheless, another remaining  
518 question to address is the maximum amount of external supplied dsRNA that a plant leaf can take  
519 and process into siRNA.

520 Finally, the use of carbon nanoparticles in agriculture is being object of concern because of their  
521 potential effects on plant development or contamination of the environment. Damages of carbon  
522 nanoparticles in the plants has been shown to be dosage dependent [65]. Thus, given the extremely  
523 small amounts (in the order of micrograms) that we apply to the plants to deliver dsRNA, we do not  
524 foresee problems in plant development. In preliminary applications of gCDs to cucumber plant for  
525 dsRNA control of cucumber green mild mosaic virus, we have not observed abnormal changes in  
526 plant growth (not shown). Therefore, regulatory agents should take into account the limited amount  
527 of the active agents (dsRNA/siRNAs) and companion adjuvants in the formulations that will  
528 probably be required in agricultural applications in the field. In conclusion, our analyses have shown  
529 that we have obtained carbon nanoparticles using hydrothermal synthesis and dialysis that are  
530 adequate for their use in RNAi applications in plants, such as crop protection against viruses, fungi or  
531 insects.

### 532 **Conflict of Interest**

533 The authors declare no conflicts of interest.

### 534 **Author Contributions**

535 L.V. and J.D. designed the research; J.D., A.D and L.V. performed the experiments; J.D., A.D. and  
536 L. V. analyzed the data and results; L.V. wrote the original draft; J.D. and L.V. wrote and edited the  
537 final manuscript; L.V. provided funds for the project.

### 538 **Acknowledgments**

539 This work was funded by grants RTA2017-C00061-C01 from the Spanish Ministerio de Ciencia,  
540 Innovación y Universidades (MICIU) and IFAPA AVA2019.015 co-financed by FEDER. J.  
541 Delgado-Martín acknowledges a predoctoral grant from MICIU. The authors wish to acknowledge  
542 the helpful assistance of J. M. Montenegro, F. D. Navas, C. Capel, and J. L. Zafra, SCAI,  
543 Universidad de Málaga and L. Fernandes Fraceto, São Paulo State University, for the valuable  
544 comments on the manuscript.

## 545 **References**

- 546 [1] Pugsley, C. E.; Isaac, R. E.; Warren, N. J.; Cayre, O. J. Recent Advances in Engineered  
547 Nanoparticles for RNAi-Mediated Crop Protection Against Insect Pests. 2021, 3 (March),  
548 652981. <https://doi.org/10.3389/fagro.2021.652981>.
- 549 [2] Kanasty, R.; Dorkin, J. R.; Vegas, A.; Anderson, D. Delivery Materials for SiRNA  
550 Therapeutics. *Nature Materials*. 2013, 967–977. <https://doi.org/10.1038/nmat3765>.
- 551 [3] Vargason, J. M.; Szittyá, G.; Burgyán, J.; Tanaka Hall, T. M. Size Selective Recognition of  
552 SiRNA by an RNA Silencing Suppressor. *Cell* 2003, 115 (7), 799–811.  
553 [https://doi.org/10.1016/S0092-8674\(03\)00984-X](https://doi.org/10.1016/S0092-8674(03)00984-X).
- 554 [4] Pantaleo, V.; Szittyá, G.; Burgyán, J. Molecular Bases of Viral RNA Targeting by Viral  
555 Small Interfering RNA-Programmed RISC. *J. Virol.* 2007, 81 (8), 3797–3806.  
556 <https://doi.org/10.1128/jvi.02383-06>.
- 557 [5] Pooggin, M. M. RNAi-Mediated Resistance to Viruses: A Critical Assessment of  
558 Methodologies. *Curr. Opin. Virol.* 2017, 26, 28–35.  
559 <https://doi.org/10.1016/j.coviro.2017.07.010>.
- 560 [6] Sanan-Mishra, N.; Abdul Kader Jailani, A.; Mandal, B.; Mukherjee, S. K. Secondary SiRNAs  
561 in Plants: Biosynthesis, Various Functions, and Applications in Virology. *Front. Plant Sci.*  
562 2021, 12 (March), 1–32. <https://doi.org/10.3389/fpls.2021.610283>.
- 563 [7] Cagliari, D.; Dias, N. P.; Galdeano, D. M.; dos Santos, E. Á.; Smaghe, G.; Zotti, M. J.  
564 Management of Pest Insects and Plant Diseases by Non-Transformative RNAi. *Front. Plant*  
565 *Sci.* 2019, 10 (October). <https://doi.org/10.3389/fpls.2019.01319>.
- 566 [8] Fletcher, S. J.; Reeves, P. T.; Hoang, B. T.; Mitter, N. A Perspective on RNAi-Based  
567 Biopesticides. *Front. Plant Sci.* 2020, 11 (February), 51.  
568 <https://doi.org/10.3389/fpls.2020.00051>.
- 569 [9] Christiaens, O.; Whyard, S.; Vélez, A. M.; Smaghe, G. Double-Stranded RNA Technology  
570 to Control Insect Pests: Current Status and Challenges. *Front. Plant Sci.* 2020, 11 (April), 1–  
571 10. <https://doi.org/10.3389/fpls.2020.00451>.
- 572 [10] Dalakouras, A.; Wassenegger, M.; Dadami, E.; Ganopoulos, I.; Pappas, M. L.; Papadopoulou,  
573 K. Genetically Modified Organism-Free RNA Interference: Exogenous Application of RNA  
574 Molecules in Plants. *Plant Physiol.* 2020, 182 (1), 38–50.  
575 <https://doi.org/10.1104/pp.19.00570>.

- 576 [11] Mujtaba, M.; Wang, D.; Carvalho, L. B.; Oliveira, J. L.; Espirito Santo Pereira, A. do; Sharif,  
577 R.; Jogaiah, S.; Paidi, M. K.; Wang, L.; Ali, Q.; Fraceto, L. F. Nanocarrier-Mediated Delivery  
578 of MiRNA, RNAi, and CRISPR-Cas for Plant Protection: Current Trends and Future  
579 Directions. *ACS Agric. Sci. Technol.* 2021, No. September.  
580 <https://doi.org/10.1021/acsagritech.1c00146>.
- 581 [12] Kehr, J.; Kragler, F. Long Distance RNA Movement. *New Phytol.* 2018, 218 (1), 29–40.  
582 <https://doi.org/10.1111/nph.15025>.
- 583 [13] Mitter, N.; Worrall, E. A.; Robinson, K. E.; Li, P.; Jain, R. G.; Taochy, C.; Fletcher, S. J.;  
584 Carroll, B. J.; Lu, G. Q.; Xu, Z. P. Clay Nanosheets for Topical Delivery of RNAi for  
585 Sustained Protection against Plant Viruses. *Nat. Plants* 2017, 3 (2), 16207.  
586 <https://doi.org/10.1038/nplants.2016.207>.
- 587 [14] Schwartz, S. H.; Hendrix, B.; Hoffer, P.; Sanders, R. A.; Zheng, W. Carbon Dots for Efficient  
588 Small Interfering RNA Delivery and Gene Silencing in Plants. *Plant Physiol.* 2020, 184 (2),  
589 647–657. <https://doi.org/10.1104/pp.20.00733>.
- 590 [15] Tenllado, F.; Martínez-García, B.; Vargas, M.; Díaz-Ruíz, J. R. Crude Extracts of Bacterially  
591 Expressed DsRNA Can Be Used to Protect Plants against Virus Infections. *BMC Biotechnol.*  
592 2003, 3, 3. <https://doi.org/https://doi.org/10.1186/1472-6750-3-3>.
- 593 [16] Gupta, D.; Singh, O. W.; Basavaraj, Y. B.; Roy, A.; Mukherjee, S. K.; Mandal, B. Direct  
594 Foliar Application of DsRNA Derived From the Full-Length Gene of NSs of Groundnut Bud  
595 Necrosis Virus Limits Virus Accumulation and Symptom Expression. *Front. Plant Sci.* 2021,  
596 12 (December), 734618. <https://doi.org/10.3389/fpls.2021.734618>.
- 597 [17] Ricci, A.; Sabbadini, S.; Miozzi, L.; Mezzetti, B.; Noris, E. Host-Induced Gene Silencing and  
598 Spray-Induced Gene Silencing for Crop Protection against Viruses. In *RNAi for plant  
599 improvement and protection*; CABI: Wallingford, 2021; pp 72–85.  
600 <https://doi.org/10.1079/9781789248890.0072>.
- 601 [18] Delgado-Martín, J., Ruiz, L., Janssen, D., Velasco, L. Exogenous application of dsRNA for  
602 the control of viruses in cucurbits. 2022, BIORXIV/2022/483310
- 603 [19] Schwab, F.; Zhai, G.; Kern, M.; Turner, A.; Schnoor, J. L.; Wiesner, M. R. Barriers,  
604 Pathways and Processes for Uptake, Translocation and Accumulation of Nanomaterials in  
605 Plants - Critical Review. *Nanotoxicology* 2016, 10 (3), 257–278.  
606 <https://doi.org/10.3109/17435390.2015.1048326>.



- 607 [20] Mourdikoudis, S.; Pallares, R. M.; Thanh, N. T. K. Characterization Techniques for  
608 Nanoparticles: Comparison and Complementarity upon Studying Nanoparticle Properties.  
609 *Nanoscale* 2018, 10 (27), 12871–12934. <https://doi.org/10.1039/C8NR02278J>.
- 610 [21] Wang, P.; Lombi, E.; Zhao, F. J.; Kopittke, P. M. Nanotechnology: A New Opportunity in  
611 Plant Sciences. *Trends Plant Sci.* 2016, 21 (8), 699–712.  
612 <https://doi.org/10.1016/j.tplants.2016.04.005>.
- 613 [22] Bao, W.; Wan, Y.; Baluška, F. Nanosheets for Delivery of Biomolecules into Plant Cells.  
614 *Trends Plant Sci.* 2017, xx, 5–7. <https://doi.org/10.1016/j.tplants.2017.03.014>.
- 615 [23] Bao, W.; Wang, J.; Wang, Q.; O'Hare, D.; Wan, Y. Layered Double Hydroxide  
616 Nanotransporter for Molecule Delivery to Intact Plant Cells. *Sci. Rep.* 2016, 6 (May), 26738.  
617 <https://doi.org/10.1038/srep26738>.
- 618 [24] Hu, H.; Xiu, K. M.; Xu, S. L.; Yang, W. T.; Xu, F. J. Functionalized Layered Double  
619 Hydroxide Nanoparticles Conjugated with Disulfide-Linked Polycation Brushes for  
620 Advanced Gene Delivery. *Bioconjug. Chem.* 2013, 24 (6), 968–978.  
621 <https://doi.org/10.1021/bc300683y>.
- 622 [25] Torney, F.; Trewyn, B. G.; Lin, V. S.-Y.; Wang, K. Mesoporous Silica Nanoparticles Deliver  
623 DNA and Chemicals into Plants. *Nat. Nanotechnol.* 2007, 2 (5), 295–300.  
624 <https://doi.org/10.1038/nnano.2007.108>.
- 625 [26] Geisler-Lee, J.; Wang, Q.; Yao, Y.; Zhang, W.; Geisler, M.; Li, K.; Huang, Y.; Chen, Y.;  
626 Kolmakov, A.; Ma, X. Phytotoxicity, Accumulation and Transport of Silver Nanoparticles by  
627 *Arabidopsis Thaliana*. *Nanotoxicology* 2013, 7 (3), 323–337.  
628 <https://doi.org/10.3109/17435390.2012.658094>.
- 629 [27] Wang, Q.; Zhang, C.; Shen, G.; Liu, H.; Fu, H.; Cui, D. Fluorescent Carbon Dots as an  
630 Efficient siRNA Nanocarrier for Its Interference Therapy in Gastric Cancer Cells. *J.*  
631 *Nanobiotechnology* 2014, 12 (1), 58. <https://doi.org/10.1186/s12951-014-0058-0>.
- 632 [28] Ma, X.; Li, S.; Hessel, V.; Lin, L.; Meskers, S.; Gallucci, F. Synthesis of Luminescent Carbon  
633 Quantum Dots by Microplasma Process. *Chem. Eng. Process. - Process Intensif.* 2019, 140  
634 (January), 29–35. <https://doi.org/10.1016/j.cep.2019.04.017>.
- 635 [29] Liu, M. L.; Chen, B. Bin; Li, C. M.; Huang, C. Z. Carbon Dots: Synthesis, Formation  
636 Mechanism, Fluorescence Origin and Sensing Applications. *Green Chem.* 2019, 21 (3), 449–  
637 471. <https://doi.org/10.1039/c8gc02736f>.
- 638 [30] Liu, C.; Zhang, P.; Zhai, X.; Tian, F.; Li, W.; Yang, J.; Liu, Y.; Wang, H.; Wang, W.; Liu, W.  
639 Nano-Carrier for Gene Delivery and Bioimaging Based on Carbon Dots with PEI-Passivation

- 640 Enhanced Fluorescence. *Biomaterials* 2012, 33 (13), 3604–3613.  
641 <https://doi.org/10.1016/j.biomaterials.2012.01.052>.
- 642 [31] Ding, H.; Yu, S.-B.; Wei, J.-S.; Xiong, H.-M. Full-Color Light-Emitting Carbon Dots with a  
643 Surface-State-Controlled Luminescence Mechanism. *ACS Nano* 2016, 10 (1), 484–491.  
644 <https://doi.org/10.1021/acsnano.5b05406>.
- 645 [32] Wang, X.; Feng, Y.; Dong, P.; Huang, J. A Mini Review on Carbon Quantum Dots:  
646 Preparation, Properties, and Electrocatalytic Application. *Front. Chem.* 2019, 7 (October), 1–  
647 9. <https://doi.org/10.3389/fchem.2019.00671>.
- 648 [33] Singh, I.; Arora, R.; Dhiman, H.; Pahwa, R. Carbon Quantum Dots: Synthesis,  
649 Characterization and Biomedical Applications. *Turkish J. Pharm. Sci.* 2018, 15 (2), 219–230.  
650 <https://doi.org/10.4274/tjps.63497>.
- 651 [34] Delgado-Martín, J.; Velasco, L. An Efficient DsRNA Constitutive Expression System in  
652 *Escherichia Coli*. *Appl. Microbiol. Biotechnol.* 2021, 105 (16–17), 6381–6393.  
653 <https://doi.org/10.1007/s00253-021-11494-6>.
- 654 [35] Shi, R.; Chiang, V. L. Facile Means for Quantifying MicroRNA Expression by Real-Time  
655 PCR. *Biotechniques* 2005, 39 (4), 519–524. <https://doi.org/10.2144/000112010>.
- 656 [36] Zhu, H.; Wang, X.; Li, Y.; Wang, Z.; Yang, F.; Yang, X. Microwave Synthesis of Fluorescent  
657 Carbon Nanoparticles with Electrochemiluminescence Properties. *Chem. Commun.* 2009, No.  
658 34, 5118–5120. <https://doi.org/10.1039/b907612c>.
- 659 [37] Jiang, K.; Wang, Y.; Gao, X.; Cai, C.; Lin, H. Facile, Quick, and Gram-Scale Synthesis of  
660 Ultralong-Lifetime Room-Temperature-Phosphorescent Carbon Dots by Microwave  
661 Irradiation. *Angew. Chemie - Int. Ed.* 2018, 57 (21), 6216–6220.  
662 <https://doi.org/10.1002/anie.201802441>.
- 663 [38] Kundu, A.; Lee, J.; Park, B.; Ray, C.; Sankar, K. V.; Kim, W. S.; Lee, S. H.; Cho, I. J.; Jun, S.  
664 C. Facile Approach to Synthesize Highly Fluorescent Multicolor Emissive Carbon Dots via  
665 Surface Functionalization for Cellular Imaging. *J. Colloid Interface Sci.* 2018, 513, 505–514.  
666 <https://doi.org/10.1016/j.jcis.2017.10.095>.
- 667 [39] Zhu, S.; Meng, Q.; Wang, L.; Zhang, J.; Song, Y.; Jin, H.; Zhang, K.; Sun, H.; Wang, H.;  
668 Yang, B. Highly Photoluminescent Carbon Dots for Multicolor Patterning, Sensors, and  
669 Bioimaging. *Angew. Chemie - Int. Ed.* 2013, 52 (14), 3953–3957.  
670 <https://doi.org/10.1002/anie.201300519>.

- 671 [40] Lu, S.; Guo, S.; Xu, P.; Li, X.; Zhao, Y.; Gu, W.; Xue, M. Hydrothermal Synthesis of  
672 Nitrogen-Doped Carbon Dots with Real-Time Live-Cell Imaging and Blood-Brain Barrier  
673 Penetration Capabilities. *Int. J. Nanomedicine* 2016, 11, 6325–6336.  
674 <https://doi.org/10.2147/IJN.S119252>.
- 675 [41] Yu, T.; Wang, H.; Guo, C.; Zhai, Y.; Yang, J.; Yuan, J. A Rapid Microwave Synthesis of  
676 Green-Emissive Carbon Dots with Solid-State Fluorescence and PH-Sensitive Properties. *R.  
677 Soc. Open Sci.* 2018, 5 (7). <https://doi.org/10.1098/rsos.180245>.
- 678 [42] Hill, S.; Galan, M. C. Fluorescent Carbon Dots from Mono- and Polysaccharides: Synthesis,  
679 Properties and Applications. *Beilstein J. Org. Chem.* 2017, 13, 675–693.  
680 <https://doi.org/10.3762/bjoc.13.67>.
- 681 [43] Kim, S.; Choi, Y.; Park, G.; Won, C.; Park, Y. J.; Lee, Y.; Kim, B. S.; Min, D. H. Highly  
682 Efficient Gene Silencing and Bioimaging Based on Fluorescent Carbon Dots in Vitro and in  
683 Vivo. *Nano Res.* 2017, 10 (2), 503–519. <https://doi.org/10.1007/s12274-016-1309-1>.
- 684 [44] Qian, K.; Guo, H.; Chen, G.; Ma, C.; Xing, B. Distribution of Different Surface Modified  
685 Carbon Dots in Pumpkin Seedlings. *Sci. Rep.* 2018, 8 (1), 1–9.  
686 <https://doi.org/10.1038/s41598-018-26167-0>.
- 687 [45] Cao, X.; Wang, J.; Deng, W.; Chen, J.; Wang, Y.; Zhou, J.; Du, P.; Xu, W.; Wang, Q.; Wang,  
688 Q.; Yu, Q.; Spector, M.; Yu, J.; Xu, X. Photoluminescent Cationic Carbon Dots as Efficient  
689 Non-Viral Delivery of Plasmid SOX9 and Chondrogenesis of Fibroblasts. *Sci. Rep.* 2018, 8  
690 (1), 1–11. <https://doi.org/10.1038/s41598-018-25330-x>.
- 691 [46] Niu, W. J.; Li, Y.; Zhu, R. H.; Shan, D.; Fan, Y. R.; Zhang, X. J. Ethylenediamine-Assisted  
692 Hydrothermal Synthesis of Nitrogen-Doped Carbon Quantum Dots as Fluorescent Probes for  
693 Sensitive Biosensing and Bioimaging. *Sensors Actuators, B Chem.* 2015, 218, 229–236.  
694 <https://doi.org/10.1016/j.snb.2015.05.006>.
- 695 [47] Zhang, M.; Hu, L.; Wang, H.; Song, Y.; Liu, Y.; Li, H.; Shao, M.; Huang, H.; Kang, Z. One-  
696 Step Hydrothermal Synthesis of Chiral Carbon Dots and Their Effects on Mung Bean Plant  
697 Growth. *Nanoscale* 2018, 10 (26), 12734–12742. <https://doi.org/10.1039/C8NR01644E>.
- 698 [48] Anwar, S.; Ding, H.; Xu, M.; Hu, X.; Li, Z.; Wang, J.; Liu, L.; Jiang, L.; Wang, D.; Dong, C.;  
699 Yan, M.; Wang, Q.; Bi, H. Recent Advances in Synthesis, Optical Properties, and Biomedical  
700 Applications of Carbon Dots. *ACS Appl. Bio Mater.* 2019, 2 (6), 2317–2338.  
701 <https://doi.org/10.1021/acsabm.9b00112>.
- 702 [49] Meierhofer, F.; Dissinger, F.; Weigert, F.; Jungclaus, J.; Müller-Caspar, K.; Waldvogel, S.  
703 R.; Resch-Genger, U.; Voss, T. Citric Acid Based Carbon Dots with Amine Type Stabilizers:

- 704 PH-Specific Luminescence and Quantum Yield Characteristics. *J. Phys. Chem. C* 2020, 124  
705 (16), 8894–8904. <https://doi.org/10.1021/acs.jpcc.9b11732>.
- 706 [50] Dou, Q.; Fang, X.; Jiang, S.; Chee, P. L.; Lee, T. C.; Loh, X. J. Multi-Functional Fluorescent  
707 Carbon Dots with Antibacterial and Gene Delivery Properties. *RSC Adv.* 2015, 5 (58),  
708 46817–46822. <https://doi.org/10.1039/c5ra07968c>.
- 709 [51] Zhang, X.; Mysore, K.; Flannery, E.; Michel, K.; Severson, D. W.; Zhu, K. Y.; Duman-  
710 Scheel, M. Chitosan/Interfering RNA Nanoparticle Mediated Gene Silencing in Disease  
711 Vector Mosquito Larvae. *J. Vis. Exp.* 2015, 2015 (97), 1–11. <https://doi.org/10.3791/52523>.
- 712 [52] Schneider, J.; Reckmeier, C. J.; Xiong, Y.; Von Seckendorff, M.; Susha, A. S.; Kasak, P.;  
713 Rogach, A. L. Molecular Fluorescence in Citric Acid-Based Carbon Dots. *J. Phys. Chem. C*  
714 2017, 121 (3), 2014–2022. <https://doi.org/10.1021/acs.jpcc.6b12519>.
- 715 [53] Wang, X.; Feng, Y.; Dong, P.; Huang, J. A Mini Review on Carbon Quantum Dots:  
716 Preparation, Properties, and Electrocatalytic Application. *Front. Chem.* 2019, 7 (October), 1–  
717 9. <https://doi.org/10.3389/fchem.2019.00671>.
- 718 [54] Han, B.; Wang, W.; Wu, H.; Fang, F.; Wang, N.; Zhang, X.; Xu, S. Polyethyleneimine  
719 Modified Fluorescent Carbon Dots and Their Application in Cell Labeling. *Colloids Surfaces*  
720 *B Biointerfaces* 2012, 100, 209–214. <https://doi.org/10.1016/j.colsurfb.2012.05.016>.
- 721 [55] Pierrat, P.; Wang, R.; Kereselidze, D.; Lux, M.; Didier, P.; Kichler, A.; Pons, F.; Lebeau, L.  
722 Efficient In vitro and In vivo Pulmonary Delivery of Nucleic Acid by Carbon Dot-Based  
723 Nanocarriers. *Biomaterials* 2015, 51, 290–302.  
724 <https://doi.org/10.1016/j.biomaterials.2015.02.017>.
- 725 [56] Dalakouras, A.; Wassenegger, M.; McMillan, J. N.; Cardoza, V.; Maegele, I.; Dadami, E.;  
726 Runne, M.; Krczal, G.; Wassenegger, M. Induction of Silencing in Plants by High-Pressure  
727 Spraying of In Vitro-Synthesized Small RNAs. *Front. Plant Sci.* 2016, 7 (AUG2016), 1–5.  
728 <https://doi.org/10.3389/fpls.2016.01327>.
- 729 [57] Hasanzadeh, A.; Radmanesh, F.; Kiani, J.; Bayandori, M.; Fatahi, Y.; Aref, A. R.; Karimi, M.  
730 Photoluminescent Functionalized Carbon Dots for CRISPR Delivery: Synthesis, Optimization  
731 and Cellular Investigation. *Nanotechnology* 2019, 30 (13). <https://doi.org/10.1088/1361-6528/aafbf9>.
- 733 [58] Milosavljevic, V.; Nguyen, H. V.; Michalek, P.; Moulick, A.; Kopel, P.; Kizek, R.; Adam, V.  
734 Synthesis of Carbon Quantum Dots for DNA Labeling and Its Electrochemical, Fluorescent

- 735 and Electrophoretic Characterization. *Chem. Pap.* 2015, 69 (1), 192–201.  
736 <https://doi.org/10.2478/s11696-014-0590-2>.
- 737 [59] Mohammadinejad, R.; Dadashzadeh, A.; Moghassemi, S.; Ashrafizadeh, M.; Dehshahri, A.;  
738 Pardakhty, A.; Sassan, H.; Sohrevardi, S. M.; Mandegary, A. Shedding Light on Gene  
739 Therapy: Carbon Dots for the Minimally Invasive Image-Guided Delivery of Plasmids and  
740 Noncoding RNAs - A Review. *J. Adv. Res.* 2019, 18, 81–93.  
741 <https://doi.org/10.1016/j.jare.2019.01.004>.
- 742 [60] Theerawanitchpan, G.; Saengkrit, N.; Sajomsang, W.; Gonil, P.; Ruktanonchai, U.; Saesoo,  
743 S.; Flegel, T. W.; Saksmerprom, V. Chitosan and Its Quaternized Derivative as Effective  
744 Long DsRNA Carriers Targeting Shrimp Virus in *Spodoptera Frugiperda* 9 Cells. *J.*  
745 *Biotechnol.* 2012, 160 (3–4), 97–104. <https://doi.org/10.1016/j.jbiotec.2012.04.011>.
- 746 [61] Kim, J.; Park, J.; Kim, H.; Singha, K.; Kim, W. J. Transfection and Intracellular Trafficking  
747 Properties of Carbon Dot-Gold Nanoparticle Molecular Assembly Conjugated with PEI-  
748 PDNA. *Biomaterials* 2013, 34 (29), 7168–7180.  
749 <https://doi.org/10.1016/j.biomaterials.2013.05.072>.
- 750 [62] Bennett, M.; Deikman, J.; Hendrix, B.; Iandolino, A. Barriers to Efficient Foliar Uptake of  
751 DsRNA and Molecular Barriers to DsRNA Activity in Plant Cells. *Front. Plant Sci.* 2020, 11  
752 (June), 816. <https://doi.org/10.3389/fpls.2020.00816>.
- 753 [63] Biedenkopf, D.; Will, T.; Knauer, T.; Jelonek, L.; Furch, A. C. U.; Busche, T.; Koch, A.  
754 Systemic Spreading of Exogenous Applied RNA Biopesticides in the Crop Plant *Hordeum*  
755 *Vulgare*. *ExRNA* 2020, 2 (1), 12. <https://doi.org/10.1186/s41544-020-00052-3>.
- 756 [64] Brosnan, C. A.; Sawyer, A.; Felippes, F. F. de; Carroll, B. J.; Waterhouse M., P.; Mitter, N.  
757 Intact Double Stranded RNA Is Mobile and Triggers RNAi against Viral and Fungal Plant  
758 Pathogens. *bioRxiv* 2021, 1–27. <https://doi.org/10.1101/2021.11.24.469772>.
- 759 [65] Verma, S. K.; Das, A. K.; Gantait, S.; Kumar, V.; Gurel, E. Applications of Carbon  
760 Nanomaterials in the Plant System: A Perspective View on the Pros and Cons. *Sci. Total*  
761 *Environ.* 2019, 667, 485–499. <https://doi.org/10.1016/j.scitotenv.2019.02.409>.

## 762 **Data Availability Statement**

763 Data available on request from the authors.

## 764 **Conflict of interest**

765 The authors declare no competing interests.

**Carbon dots for dsRNA delivery in plants**

766



## 767 FIGURES AND TABLE

768 **Figure 1.** (A) Absorption spectra of the carbon dots obtained in this work. Color of the water  
769 dilutions of the nanoparticles when illuminated with white (upper inset) and ultraviolet light (lower  
770 inset). From left to right: solution of glucose and bPEI in water, gCD-IN (gCD retained in the 1 KDa  
771 MWCO dialysis membranes), gCD-OUT (gCD eluate from the membranes), sCD-IN (sCD retained)  
772 and sCD-OUT (sCD eluate). **(B)** Fluorescence spectra of the glucose (A) and saccharose (B) carbon  
773 dots when excited with a range of wavelengths. Wavelength scanning was performed from 250 to  
774 475 nm with steps of 25 nm. **(C)** FT-IR spectra of the glucose and saccharose carbon dots obtained in  
775 this work.

776 **Figure 2.** XPS spectra of the respective gCD and sCD: survey spectra (A, E), C1s regions (B, F),  
777 N1s regions and (C, G) and O1s regions (D, H).

778 **Figure 3.** Sizes of the particles in water suspension according to the Zetasizer. **(A)** gCD retained, **(B)**  
779 gCD eluate, **(C)** sCD retained and **(D)** sCD eluate. Apparent  $\zeta$  potential distributions from **(E)** gCD  
780 (glucose passivated with bPEI 2 KDa) and **(F)** sCD (saccharose passivated with bPEI 2 KDa).

781 **Figure 4.** TEM images of gCDs. **(A)** TEM at 200 nm scale; **(B)** TEM at 10 nm scale allowing the  
782 observation of lattice fringes in the nanoparticles; **(C)** Fourier transform of the particles in image **(A)**.  
783 The red arrow point to the white dots in the Fourier transform that indicate a crystalline structure.

784 **Figure 5.** Apparent  $\zeta$  potential distributions and hydrodynamic diameters for the dsRNA and the  
785 gCD-dsRNA and sCD-dsRNA nanocomposites.

786 **Figure 6.** Delay of dsRNAs migration in 2% agarose gel electrophoresis when coated with increasing  
787 amounts of gCD **(A)** and sCD **(B)**. (1) dsRNA; (2) gCD/sCD; (3) gCD/sCD:dsRNA [1:10]; (4)  
788 gCD/sCD:dsRNA [1:5]; (5) gCD/sCD:dsRNA [1:2.5]; (6) gCD/sCD:dsRNA [1:2]; (7)  
789 gCD/sCD:dsRNA [1:1]. **(C)** RNase protection assays: (1) pristine dsRNA, (2) dsRNA and 0.125 U  
790 RNase A 5 min, (3) gCD-dsRNA, (4) gCD-dsRNA and 1.25 U RNase A 5 min, (5) gCD-dsRNA  
791 and 0.125 U RNase A 5 min, (6) dsRNA and 1.125 RNase A 5 min. M: NZY Tech Ladder V  
792 molecular weight marker.

793 **Figure 7.** Quantitation of (ds)RNA in leaves after 3 dpt of the application of the gCD-dsRNA or  
794 naked dsRNA in local **(A)** and distal leaves **(C)**. Quantitation of the derived 6125-vsiRNA in local  
795 samples **(B)** and distal leaves **(D)**.

796 **Figure 8.** Confocal microscopy of cucumber leaves treated with dsRNA\*FITC and gCD-  
 797 dsRNA\*FITC before and after washing them with distilled water. Column 1: bright-field (BF)  
 798 images; column 2: FITC fluorescence images; column 3: BF and FITC merged images

799 **Figure 9.** Confocal microscopy at higher resolution of cucumber leaves treated with dsRNA\*FITC  
 800 (A, C) and gCD-dsRNA\*FITC (B, D) after washing the leaves with water.

801 **Table 1.** Comparisons of fold changes in the quantitation of (ds)RNA and 6125-vsiRNA in the site of  
 802 application and on distal leaves after spraying dsRNA, 0.1X dsRNA, gCD-dsRNA or 0.1X gCD-  
 803 dsRNA.

| Condition     | Comparison                      | Fold increase      |                   |
|---------------|---------------------------------|--------------------|-------------------|
|               |                                 | (ds)RNA            | vsiRNA            |
| Local leaves  | gCD-dsRNA 1X vs. dsRNA 1X       | 50.4               | 13.6              |
|               | dsRNA 1X vs. dsRNA 0.1X         | 207.4              | 547.3             |
|               | gCD-dsRNA 1X vs. gCD-dsRNA 0.1X | 95.7               | 22.4              |
|               | gCD-dsRNA 0.1X vs. dsRNA 1X     | 1.05               | 3.3               |
| Distal leaves | gCD-dsRNA 1X vs. dsRNA 1X       | 1188.5             | 12.4              |
|               | gCD-dsRNA 1X vs. gCD-dsRNA 0.1X | 6.89               | 74.2              |
|               | gCD-dsRNA 0.1X vs. dsRNA 1X     | 345.0              | 7.4               |
| gCD-dsRNA 1X  | Local vs. distal                | $1.7 \times 10^3$  | $3.4 \times 10^3$ |
| dsRNA 1X      | Local vs. distal                | $2.59 \times 10^5$ | $3.3 \times 10^4$ |

804

## 805 **Supplementary Material**

806 Table S1. Atomic concentration table (%) for the sCD and gCD according to the XPS analysis.

807 Supp. Fig. 1. Serial dilutions of saccharose sCDs. The aspect of the glucose gCDs dilutions resulted  
 808 similar.

809 Supp. Fig. 2. Absorption spectra of carbon dots according to the proportion (weight: weight) between  
 810 the carbon precursor and the bPEI, the temperature and time of reaction in the hydrothermal  
 811 synthesis.

812 Supp. Fig. 3. Determination of isoelectric points of the carbon dots obtained from glucose (A) or  
 813 saccharose (B) passivated with bPEI 2 KDa.

814 Supp. Fig. 4. Migration in 2% agarose gel of FITC-labeled dsRNA when naked or coated with CDs.

815



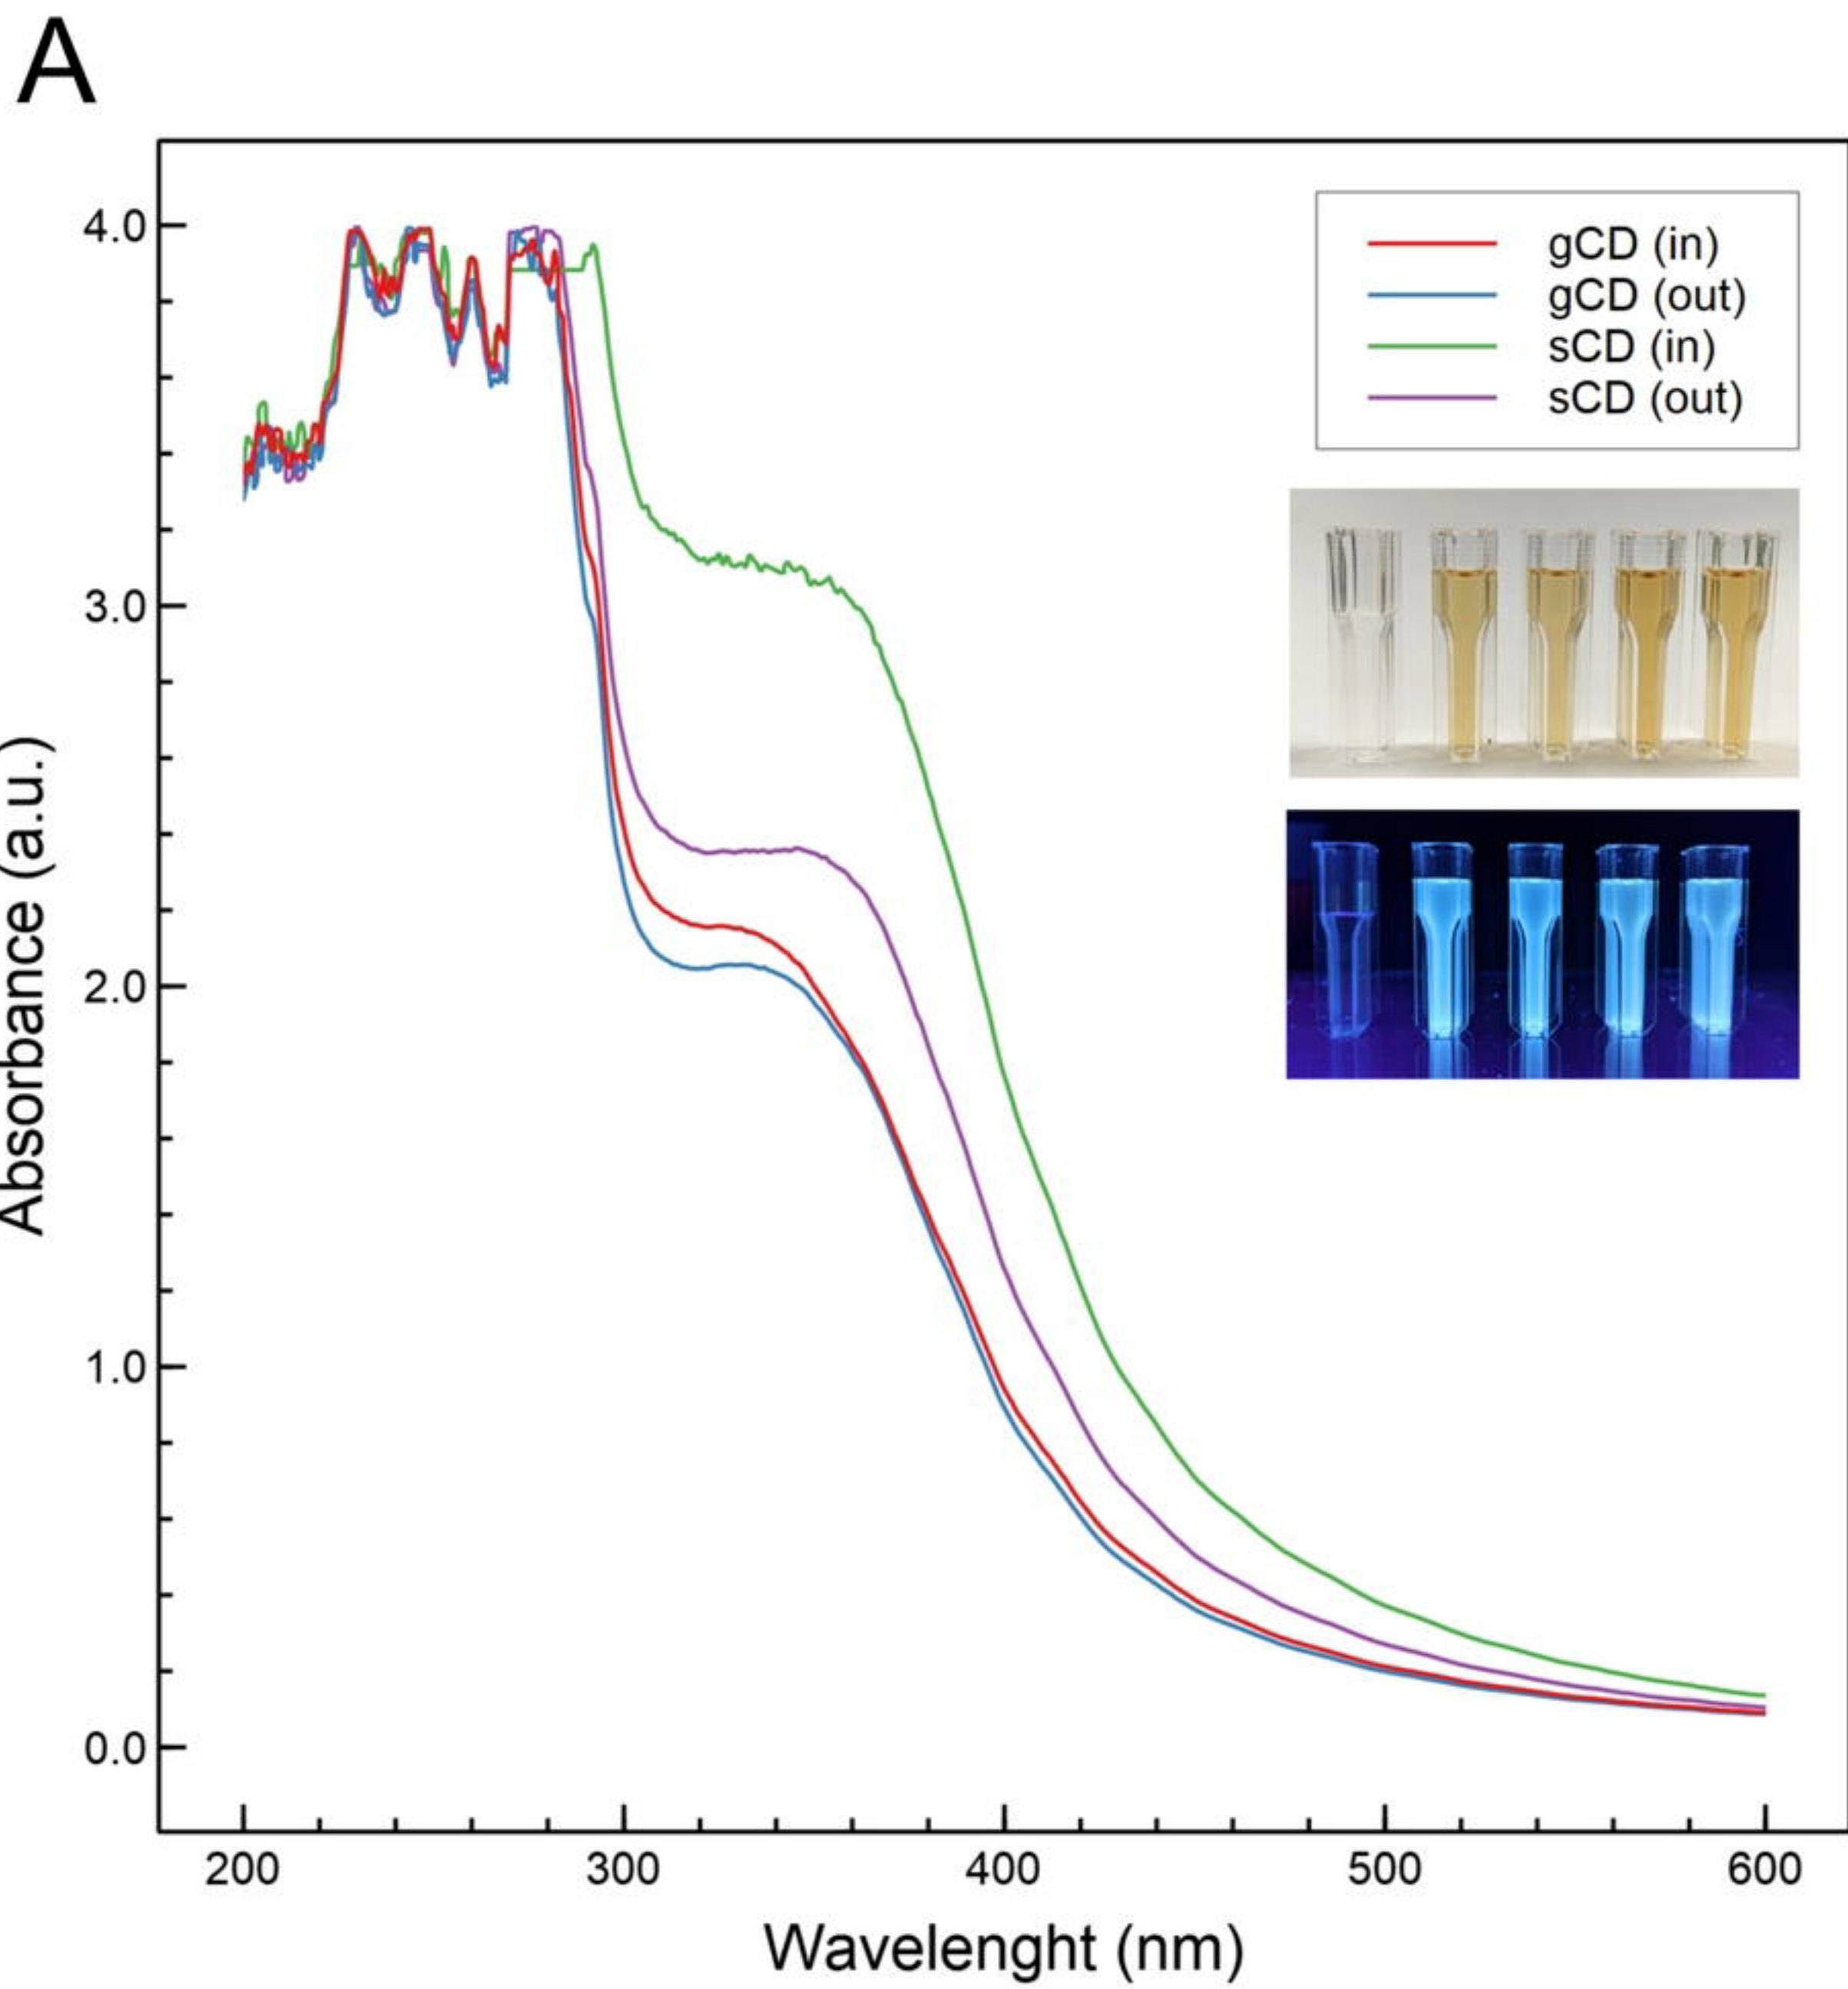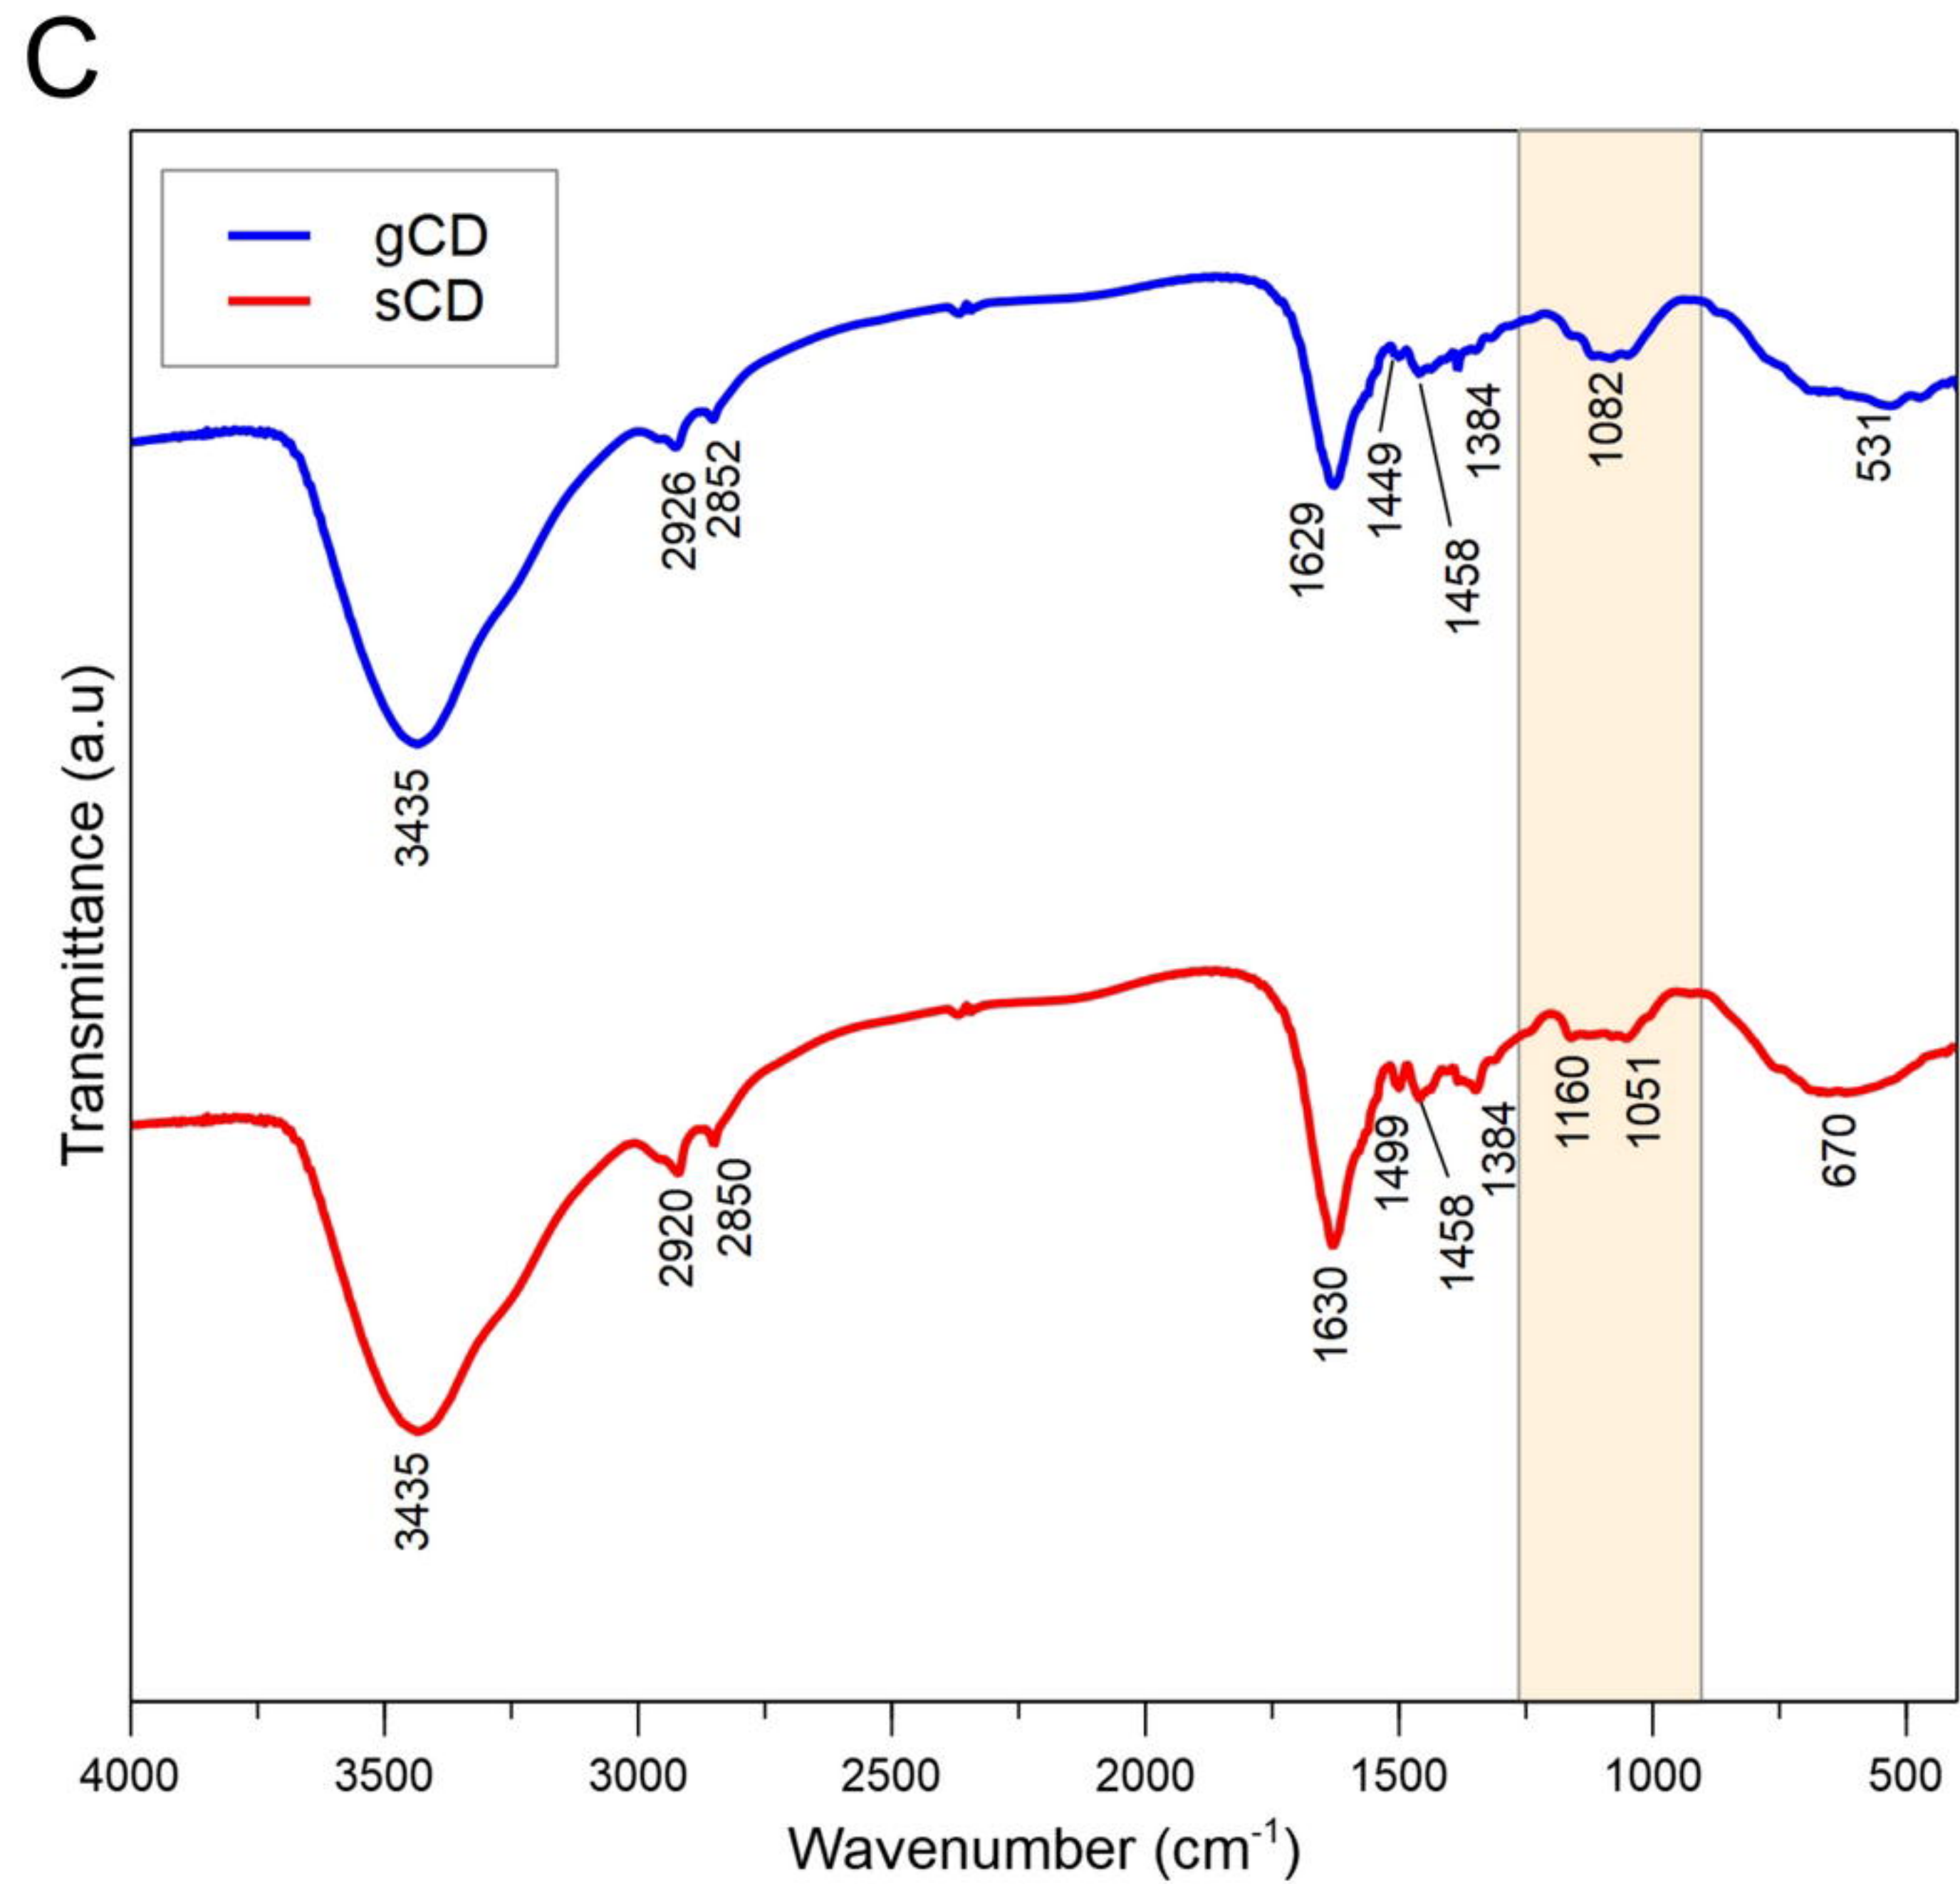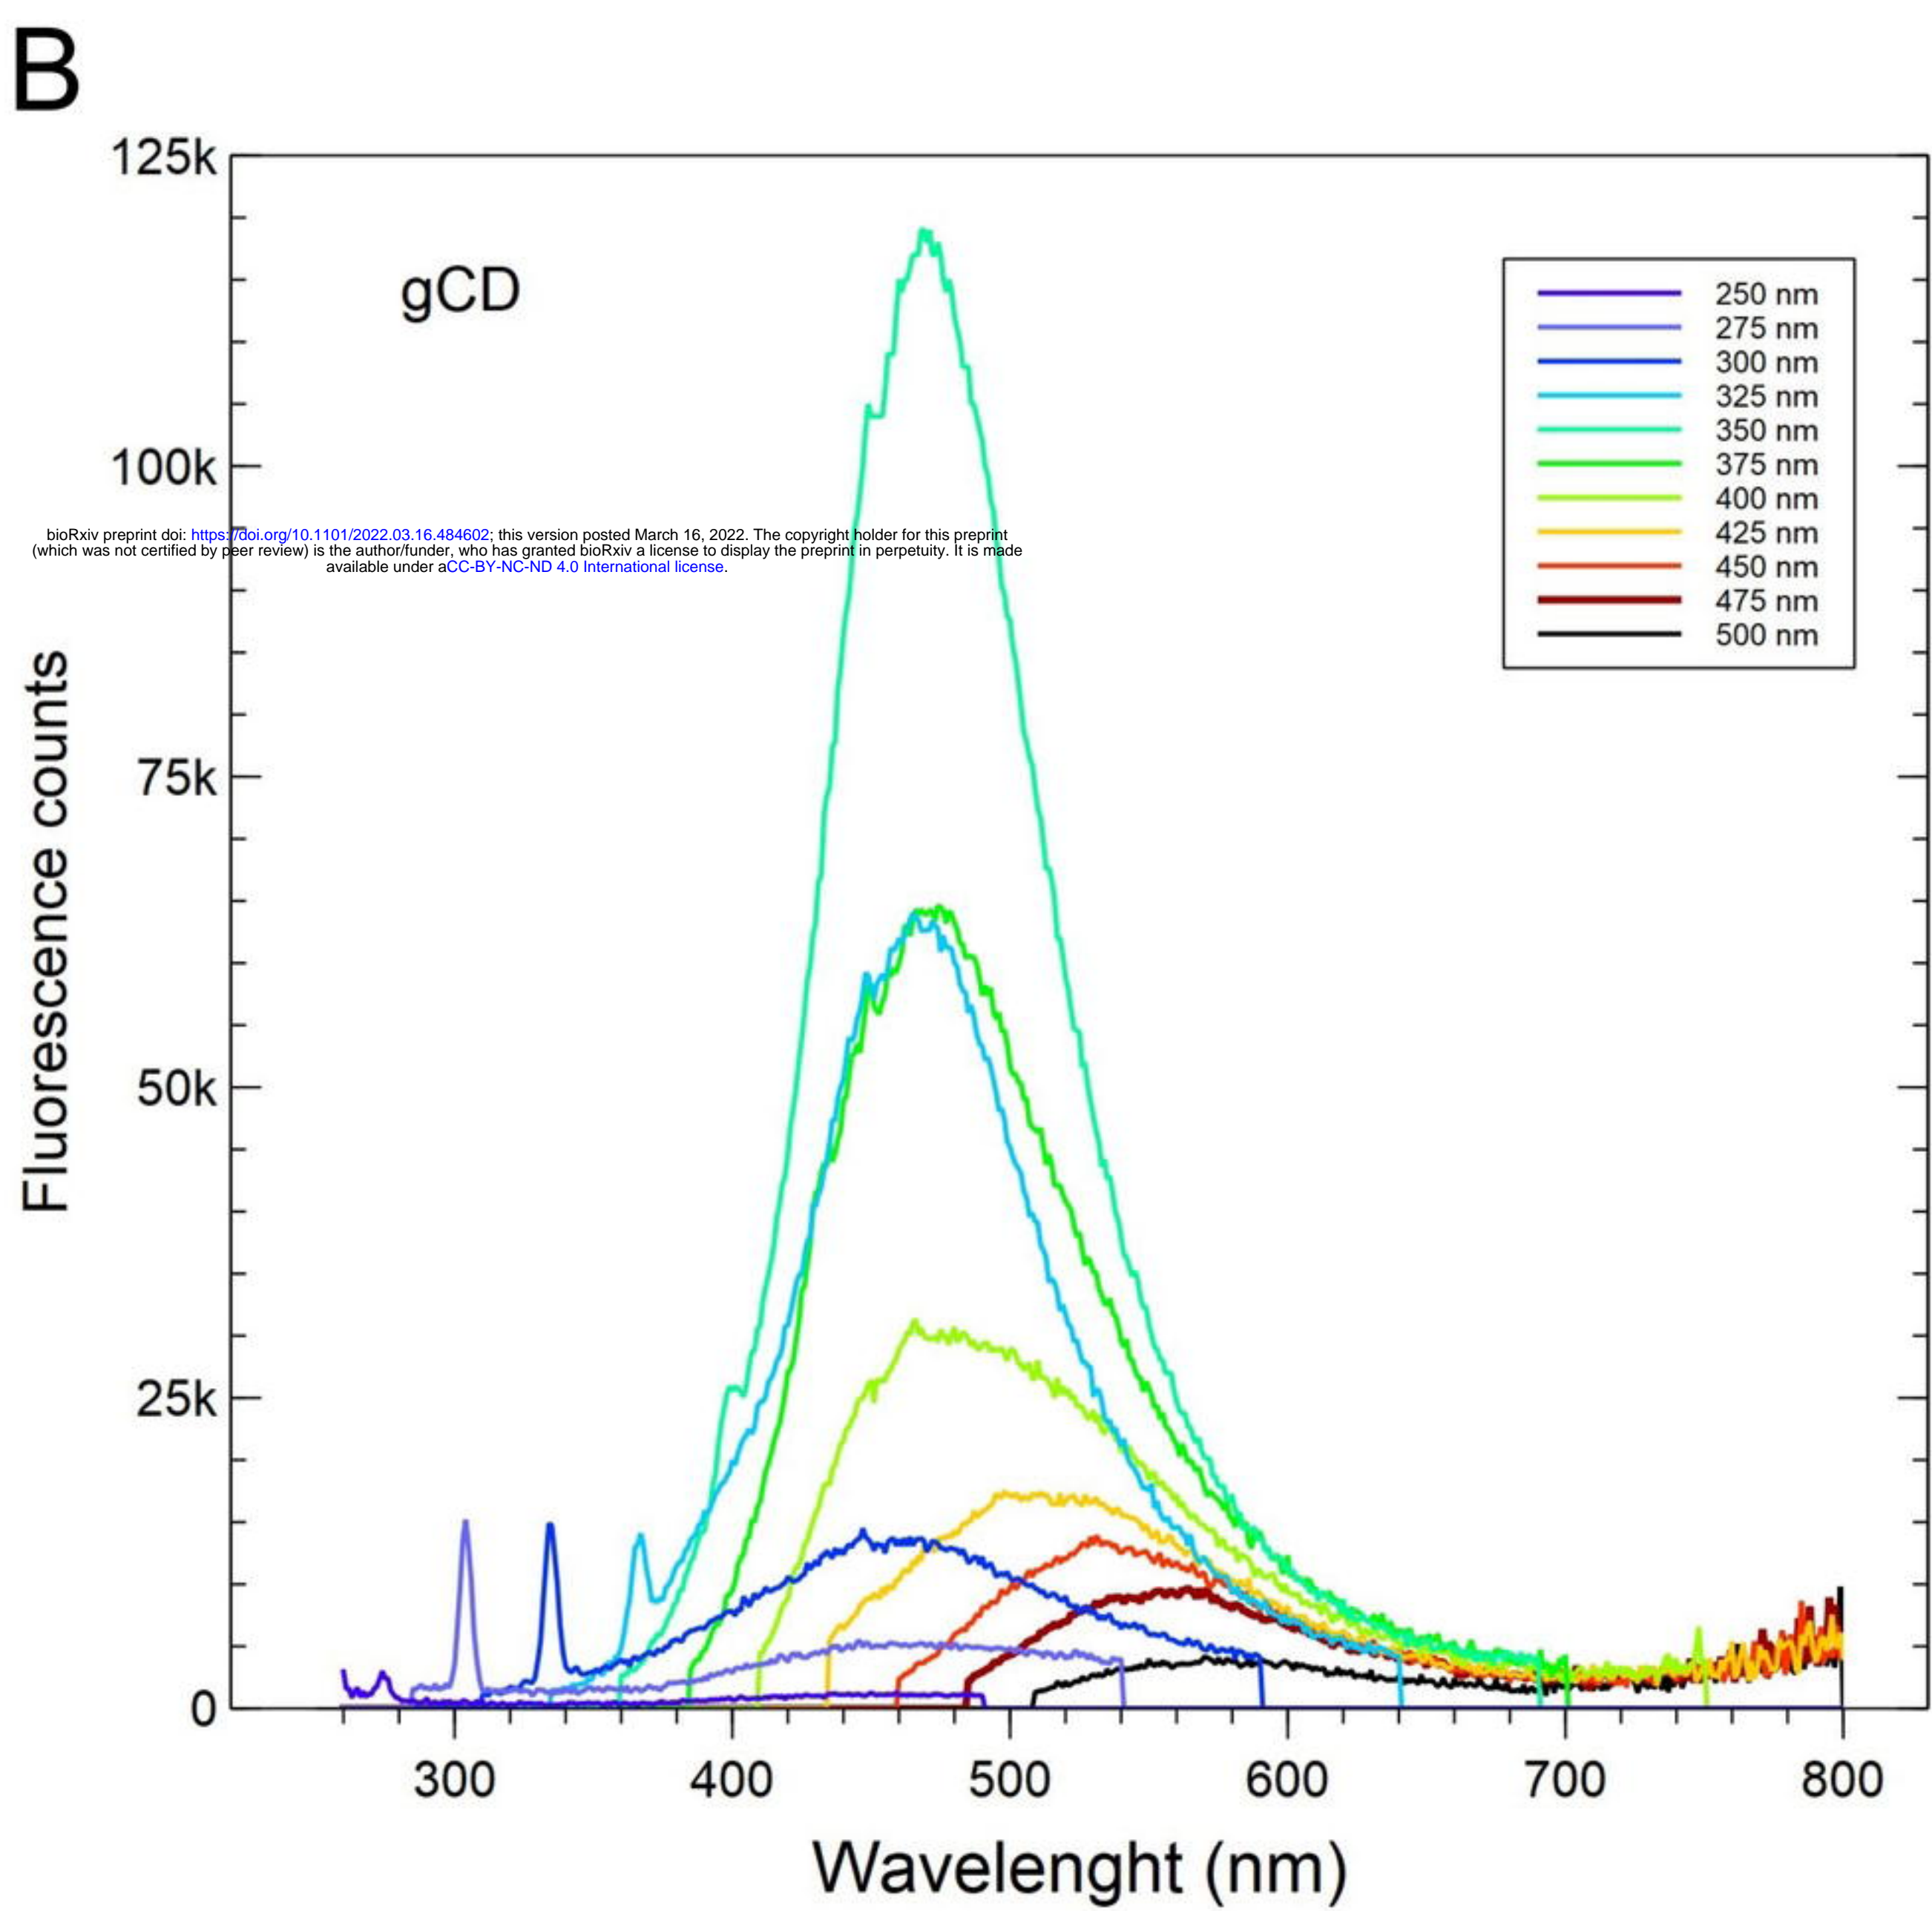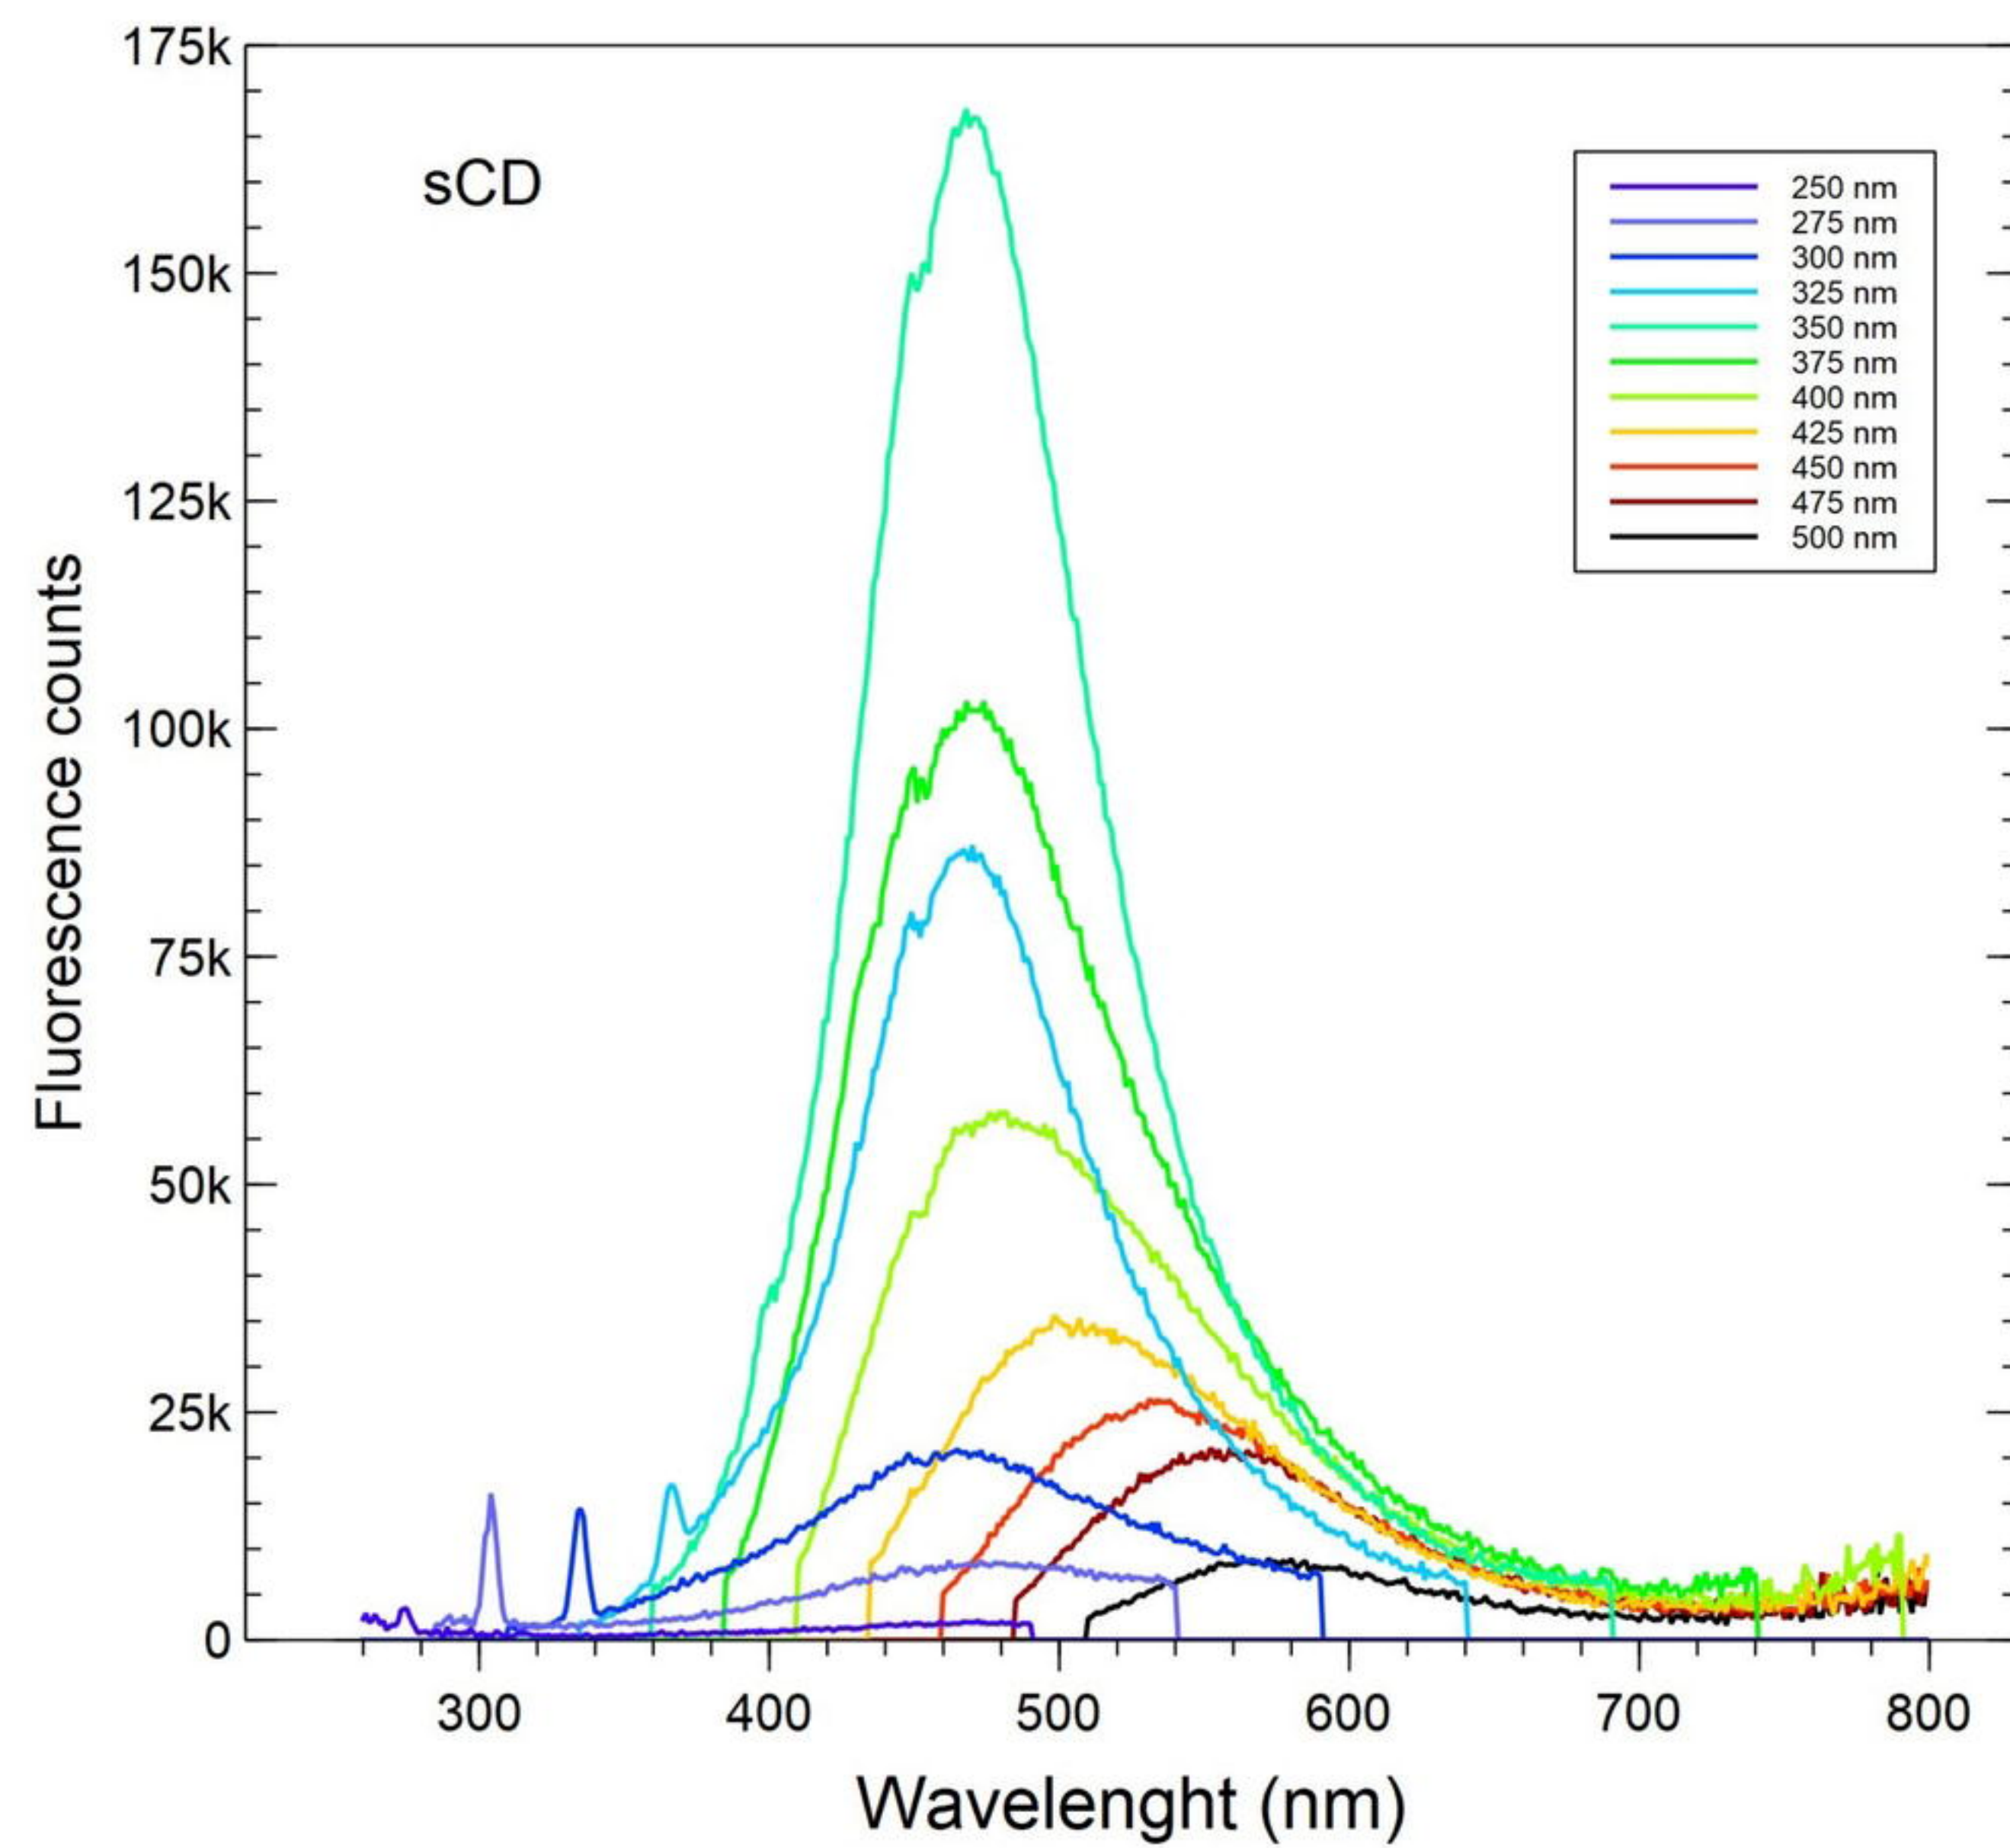



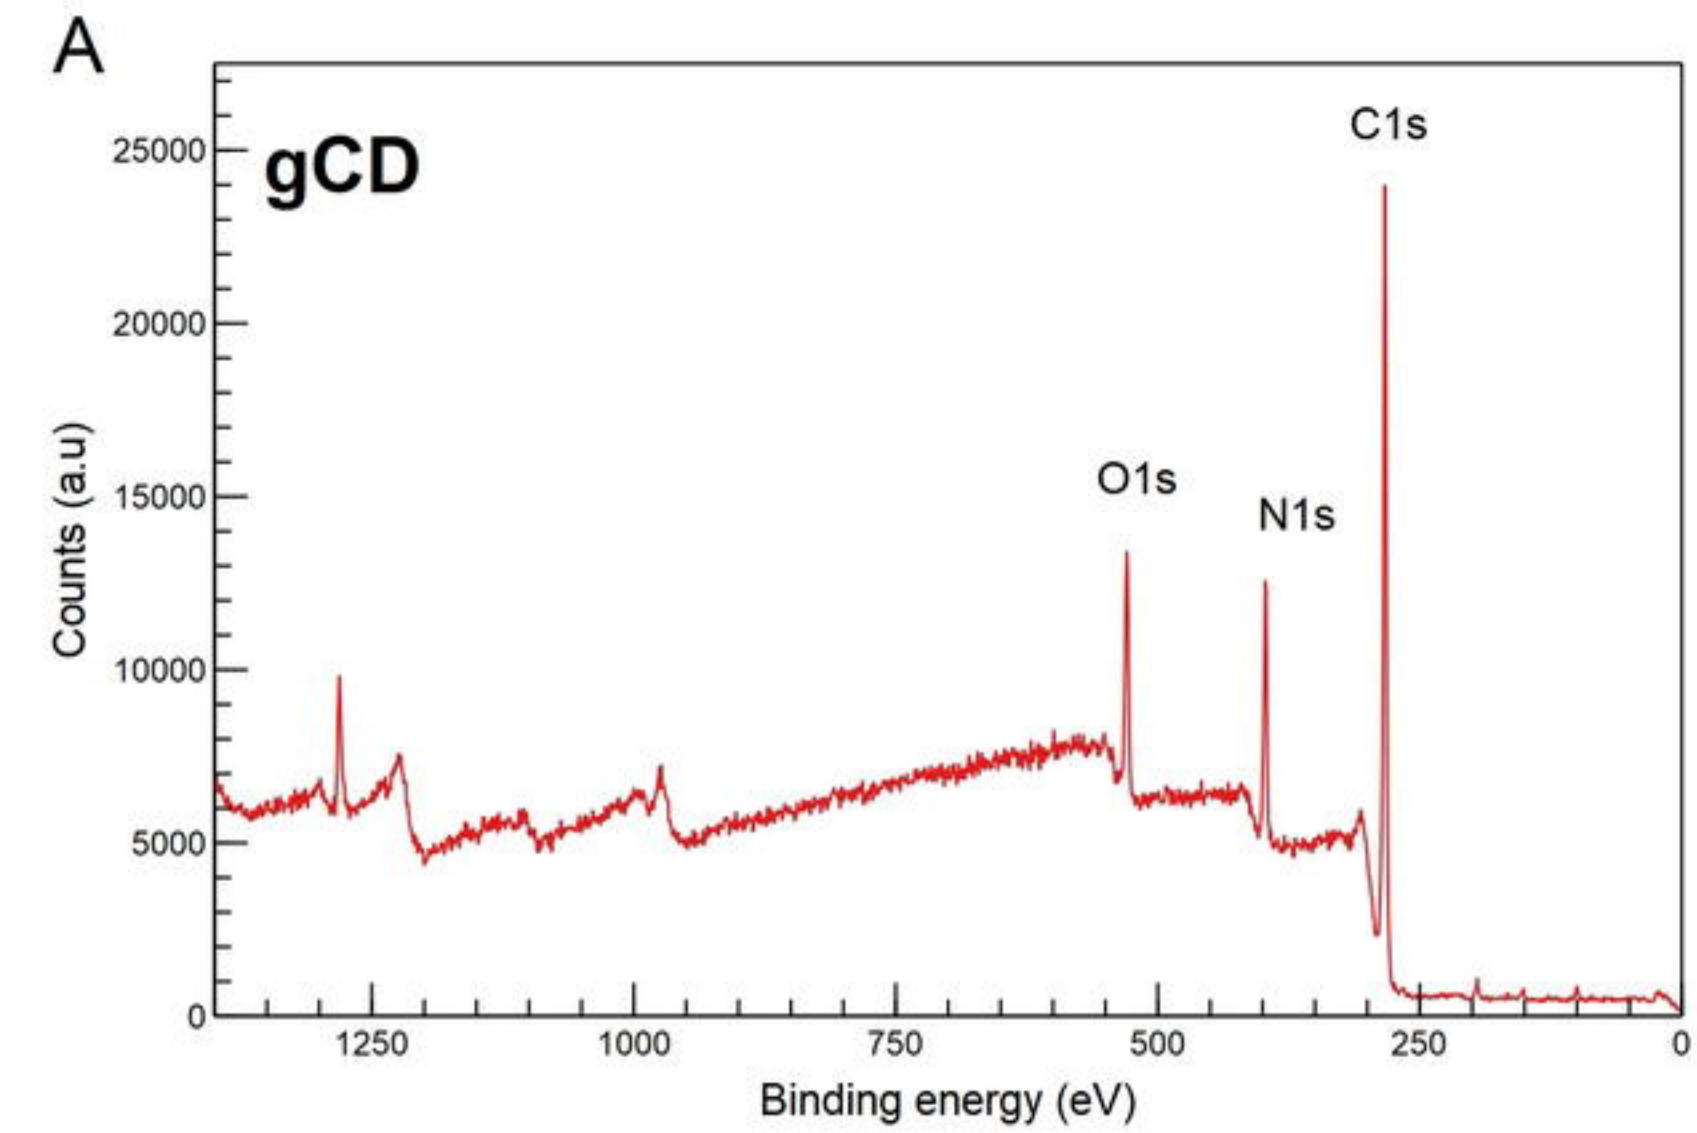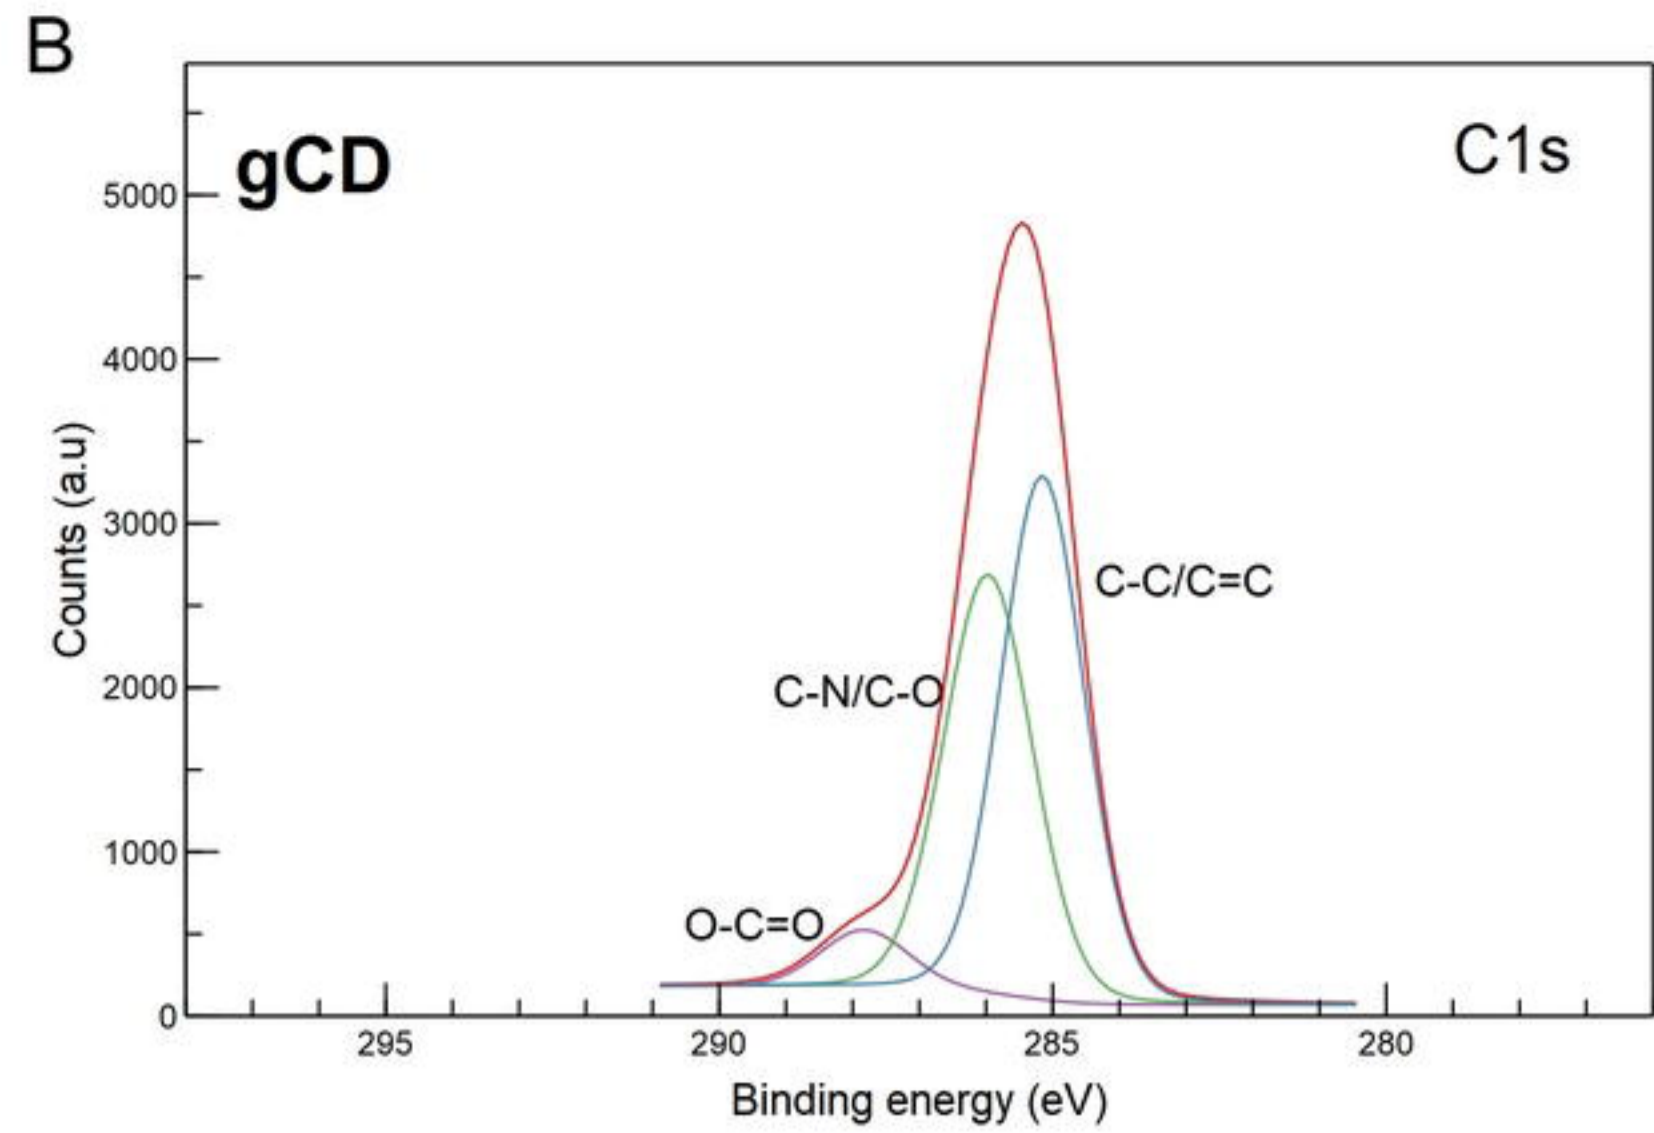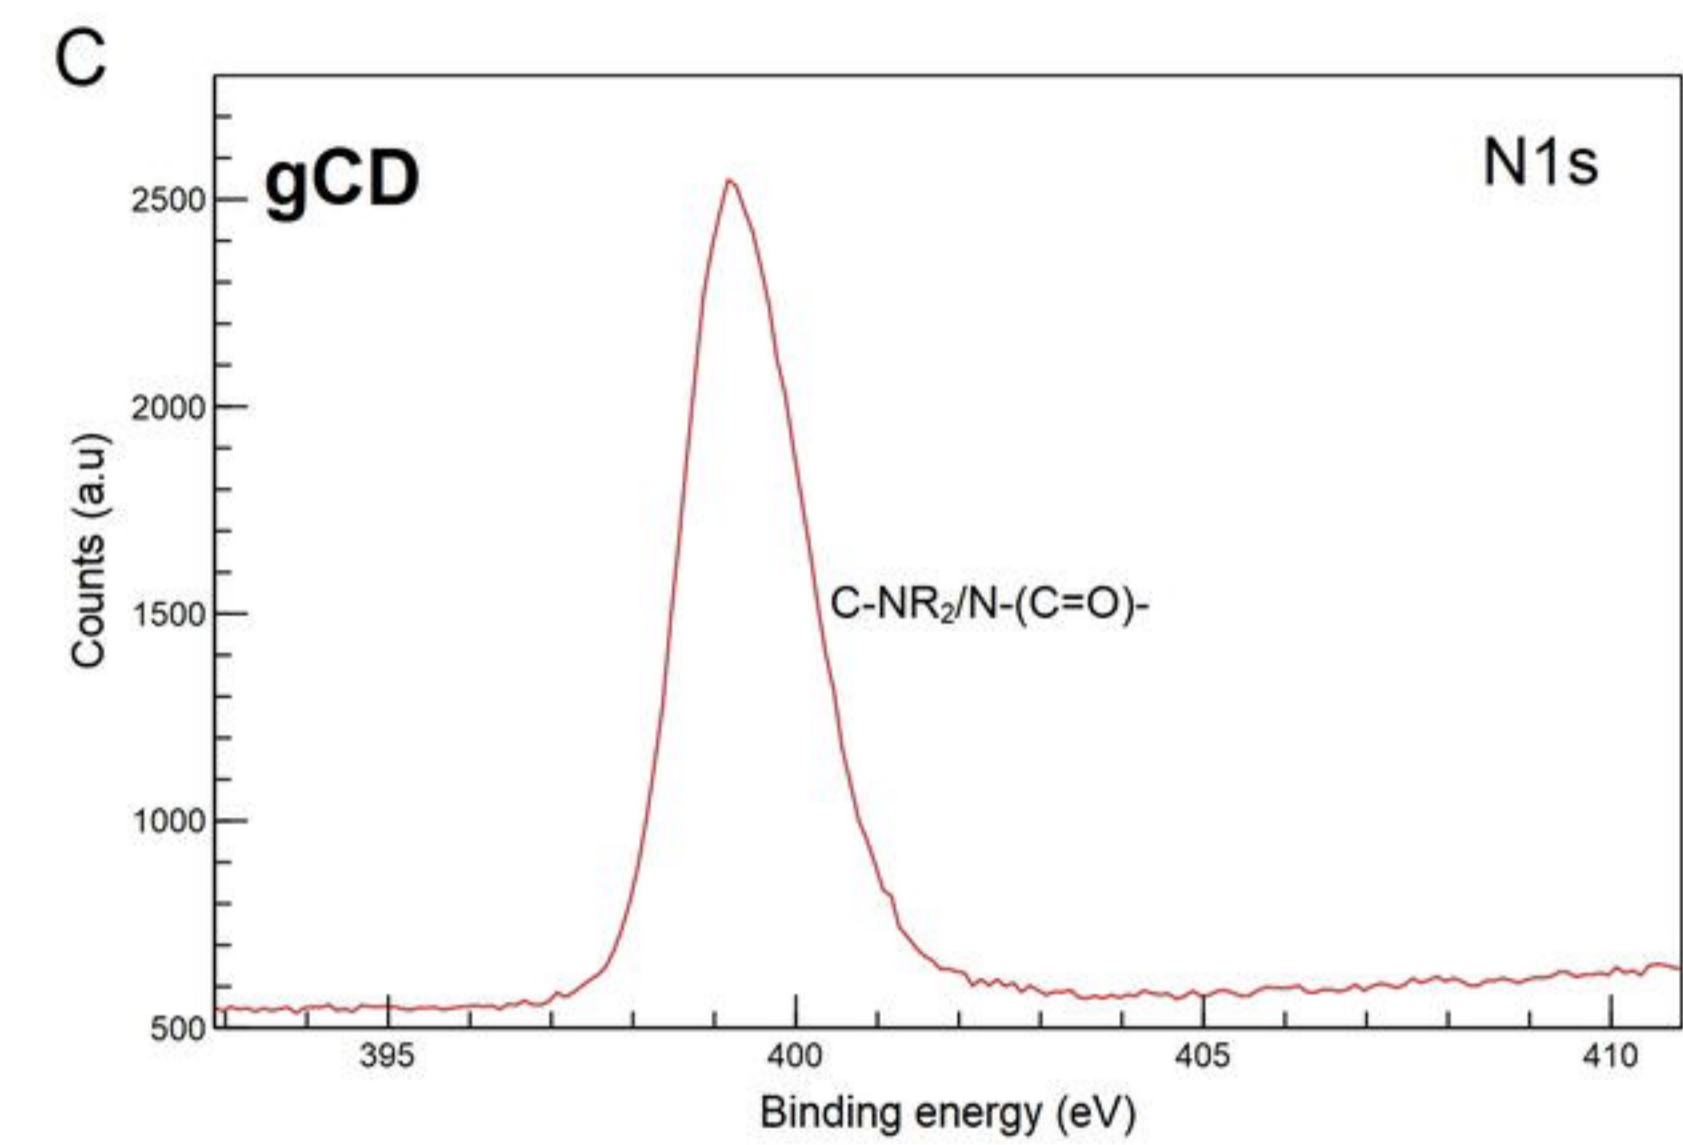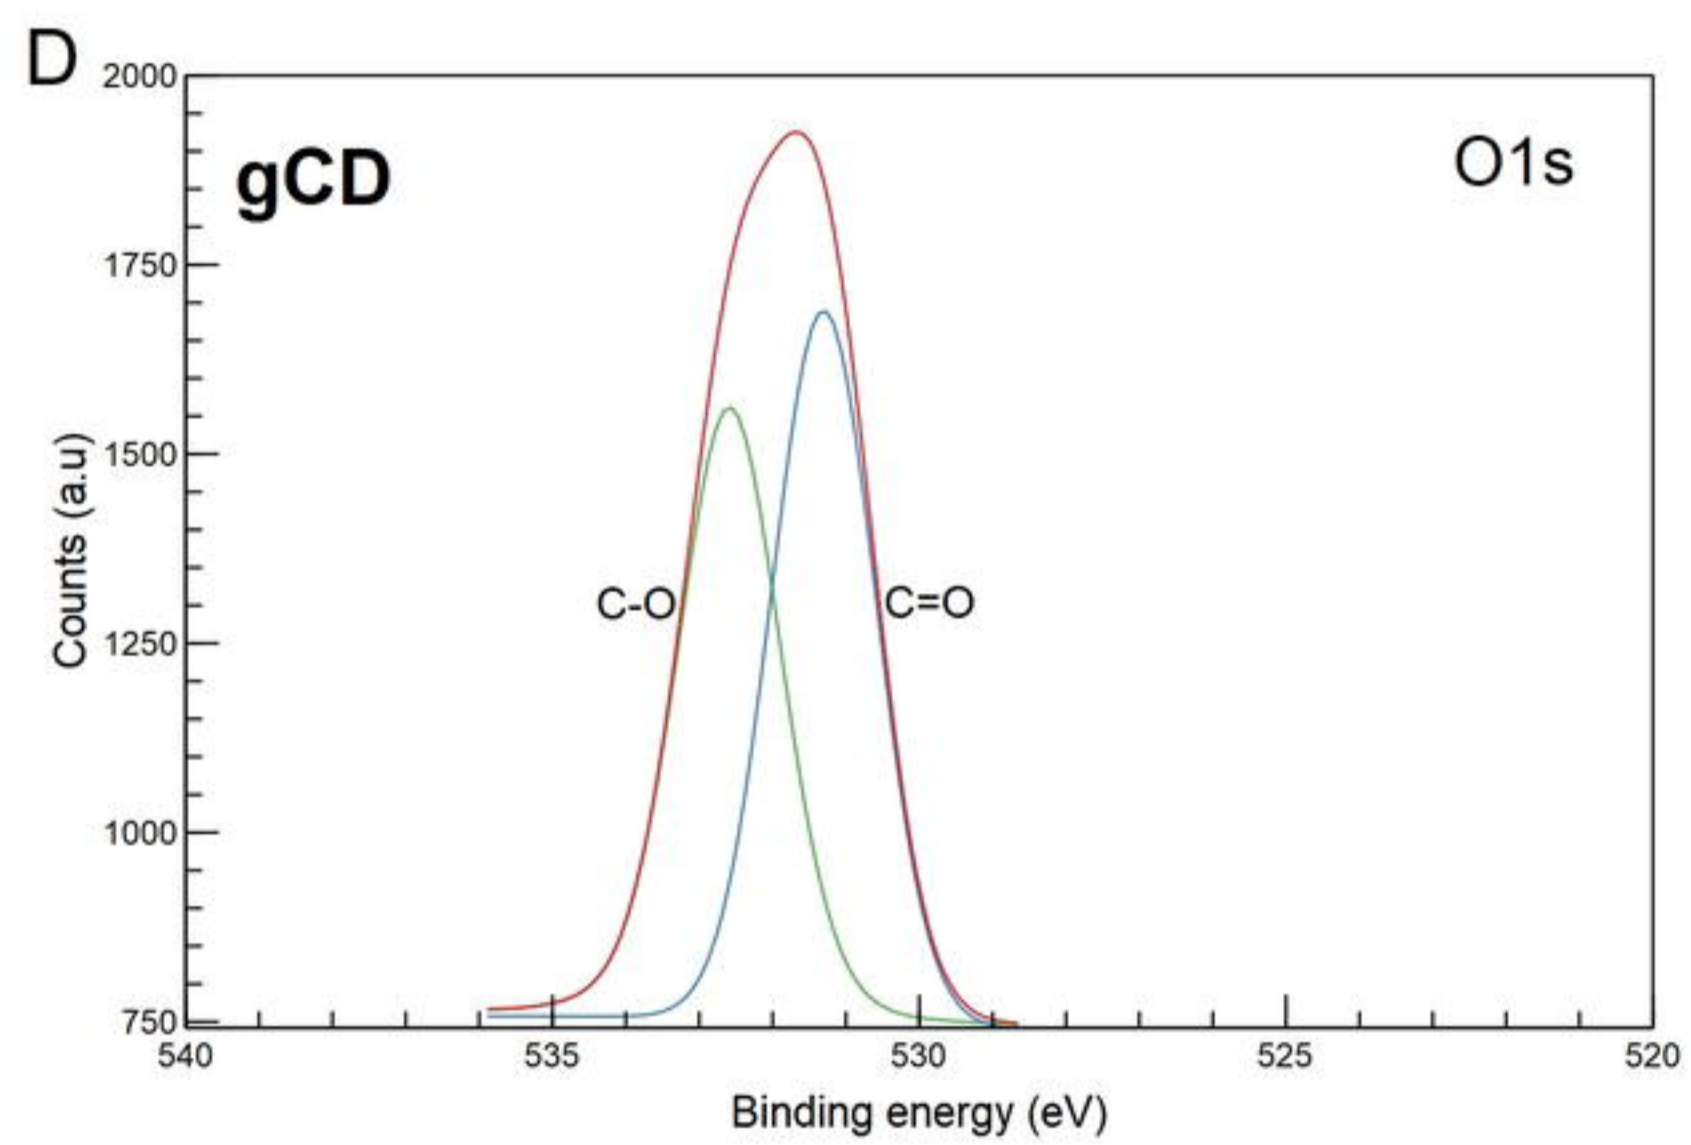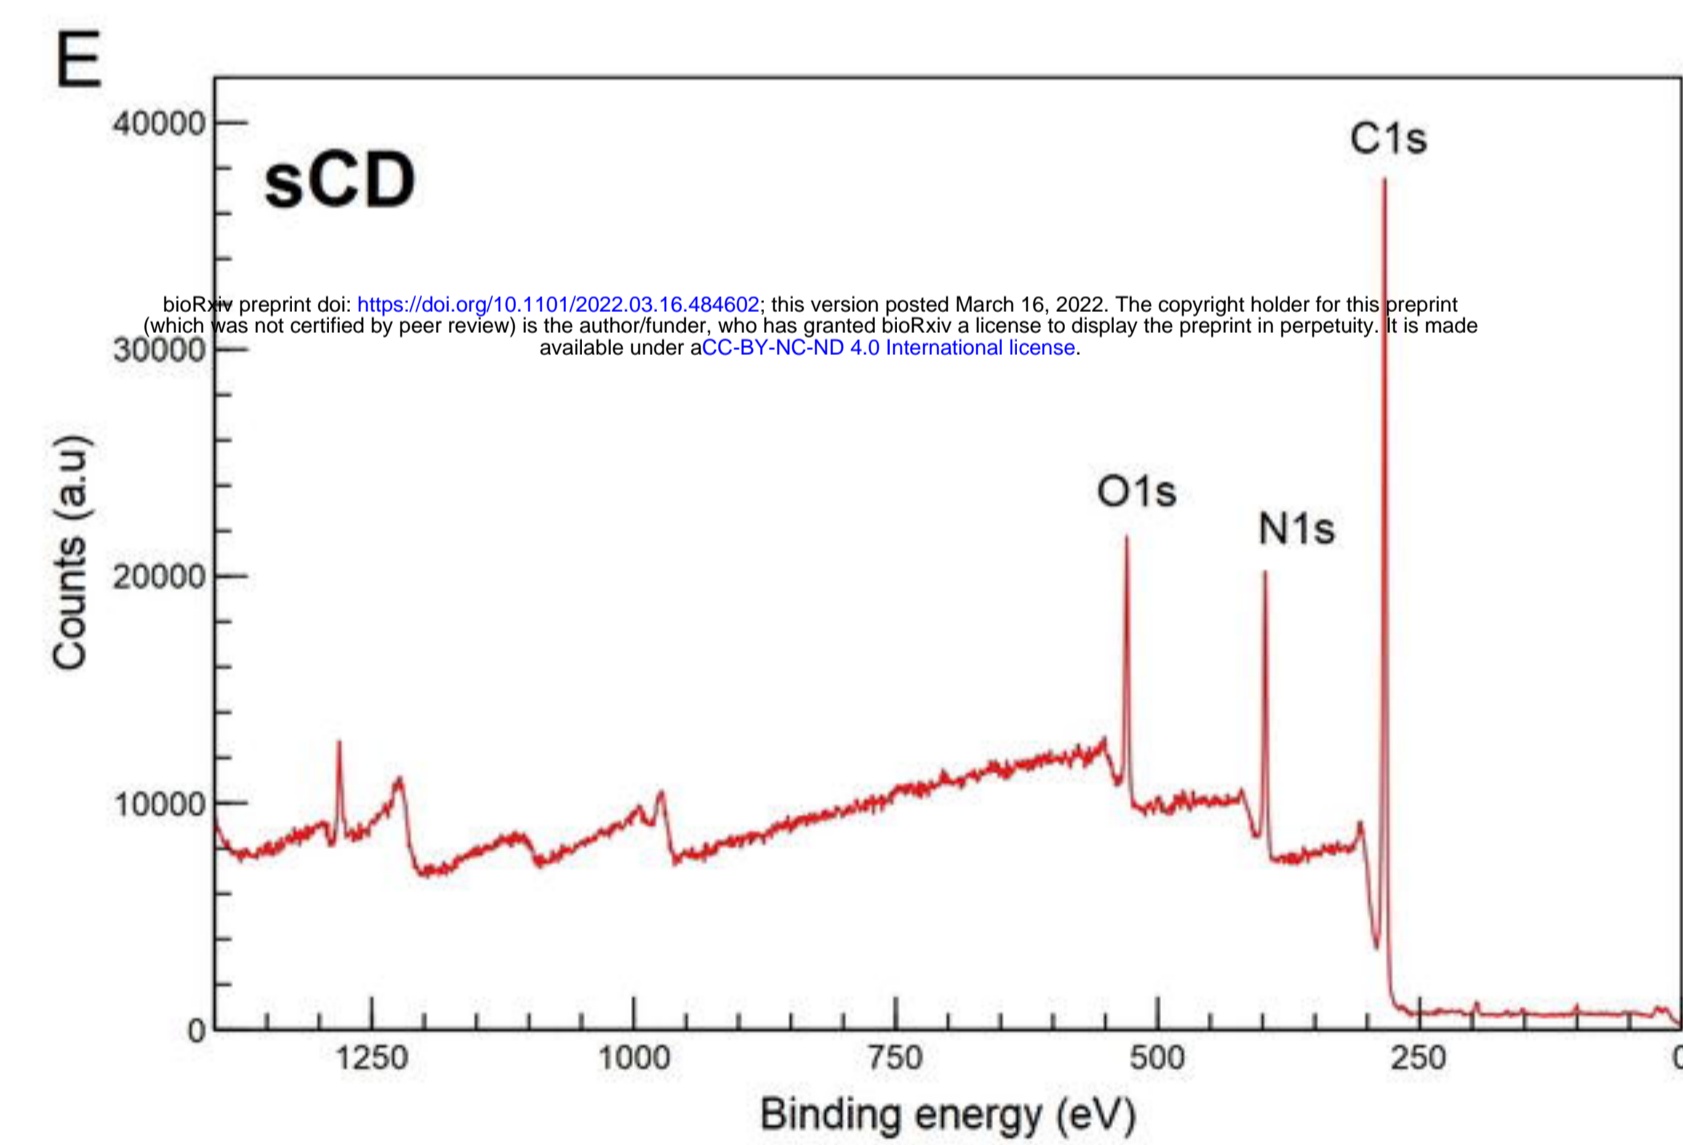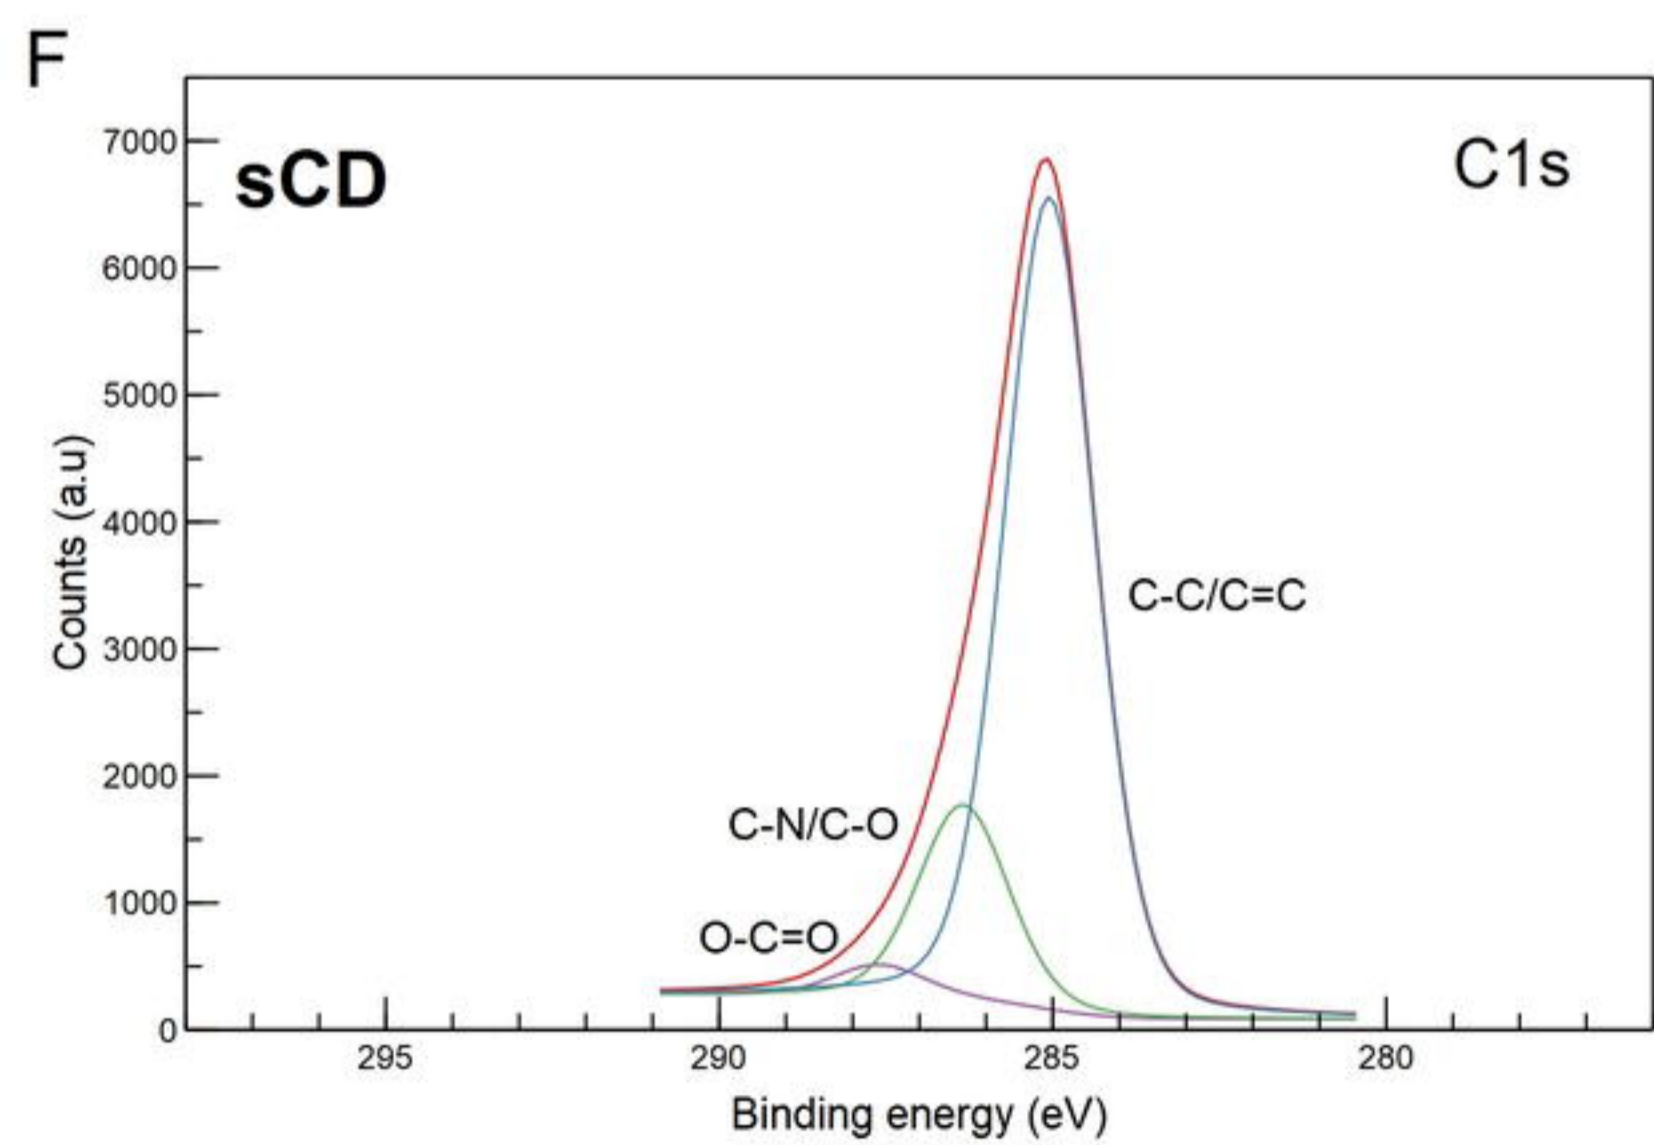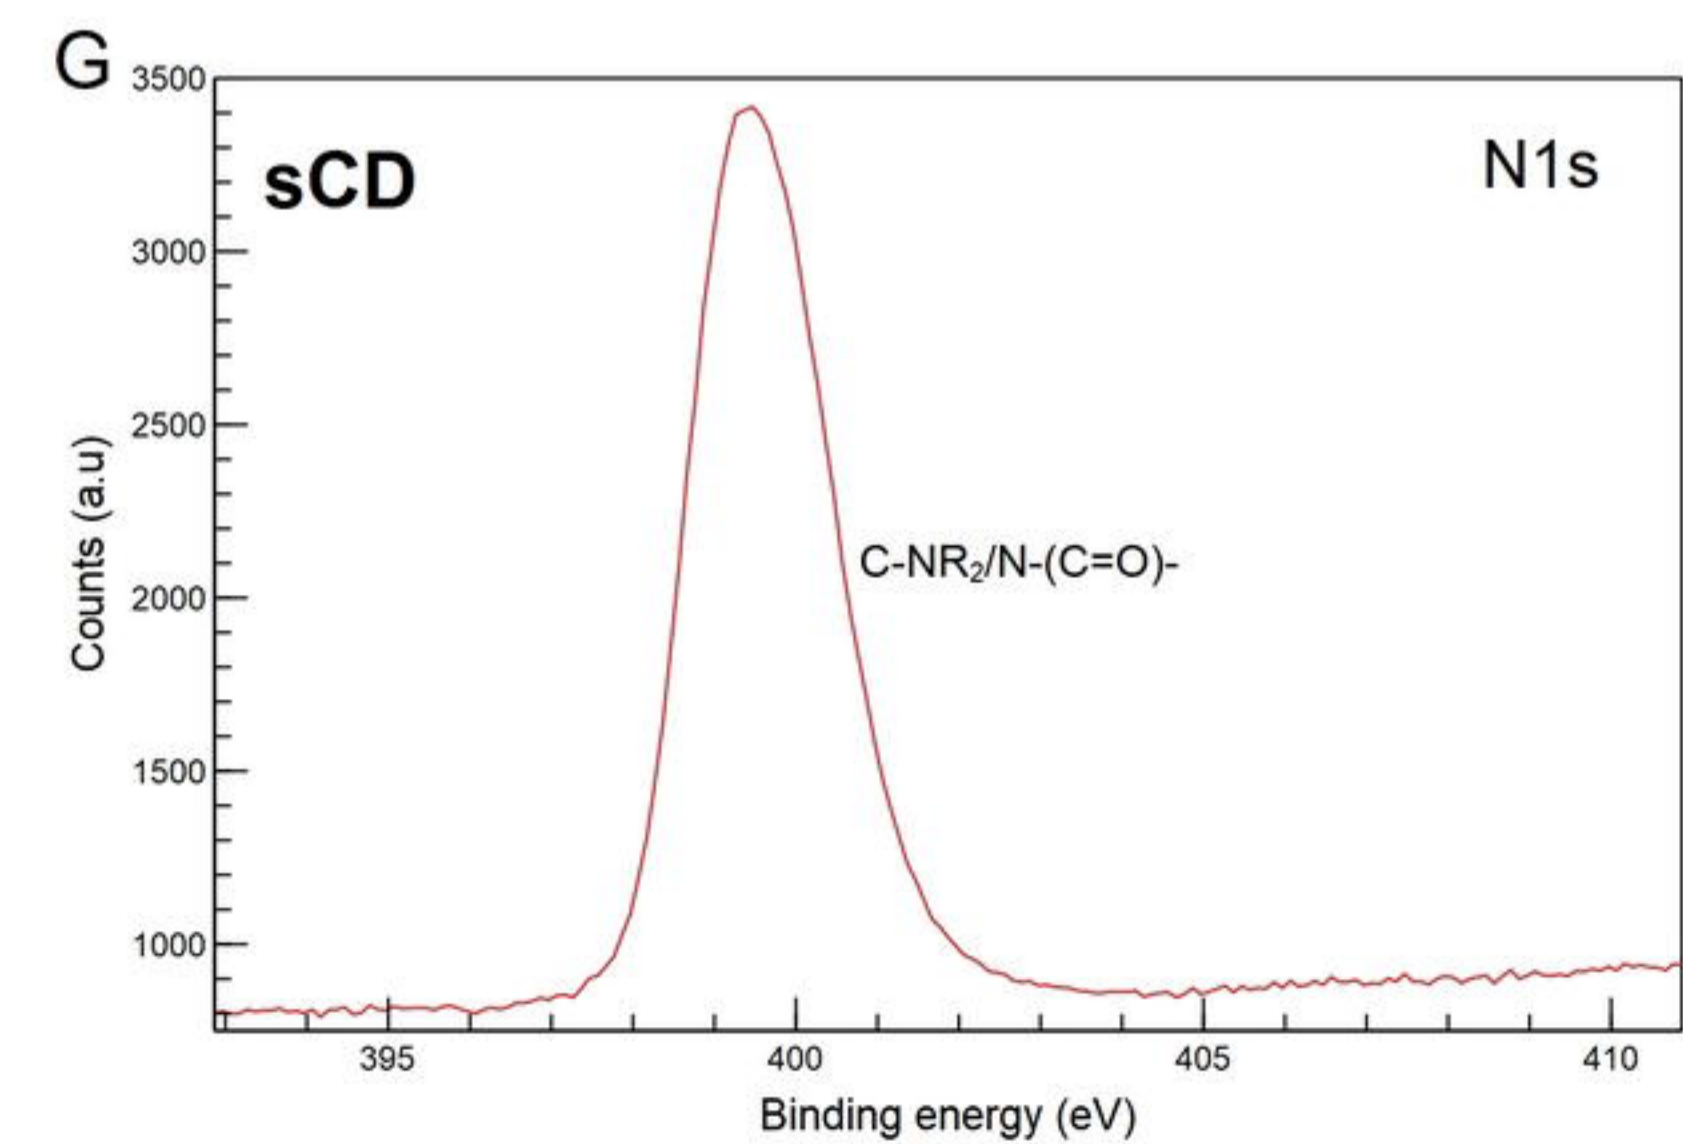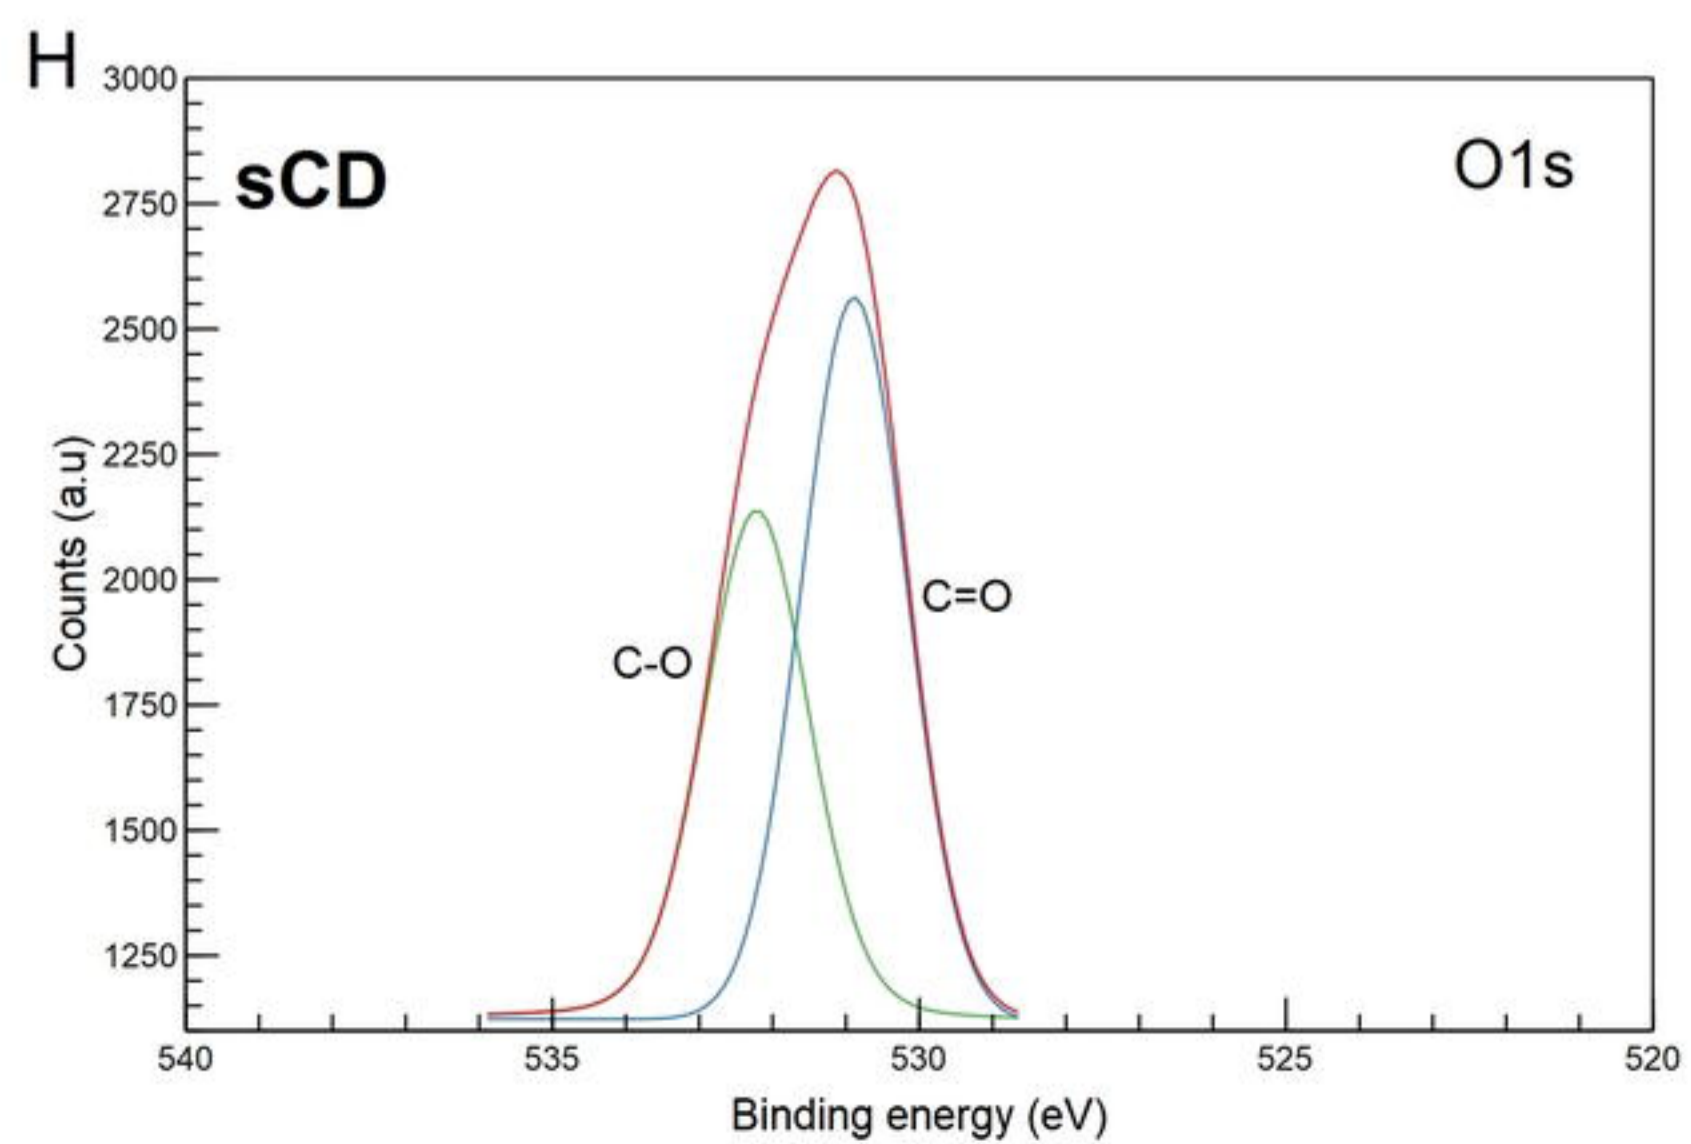



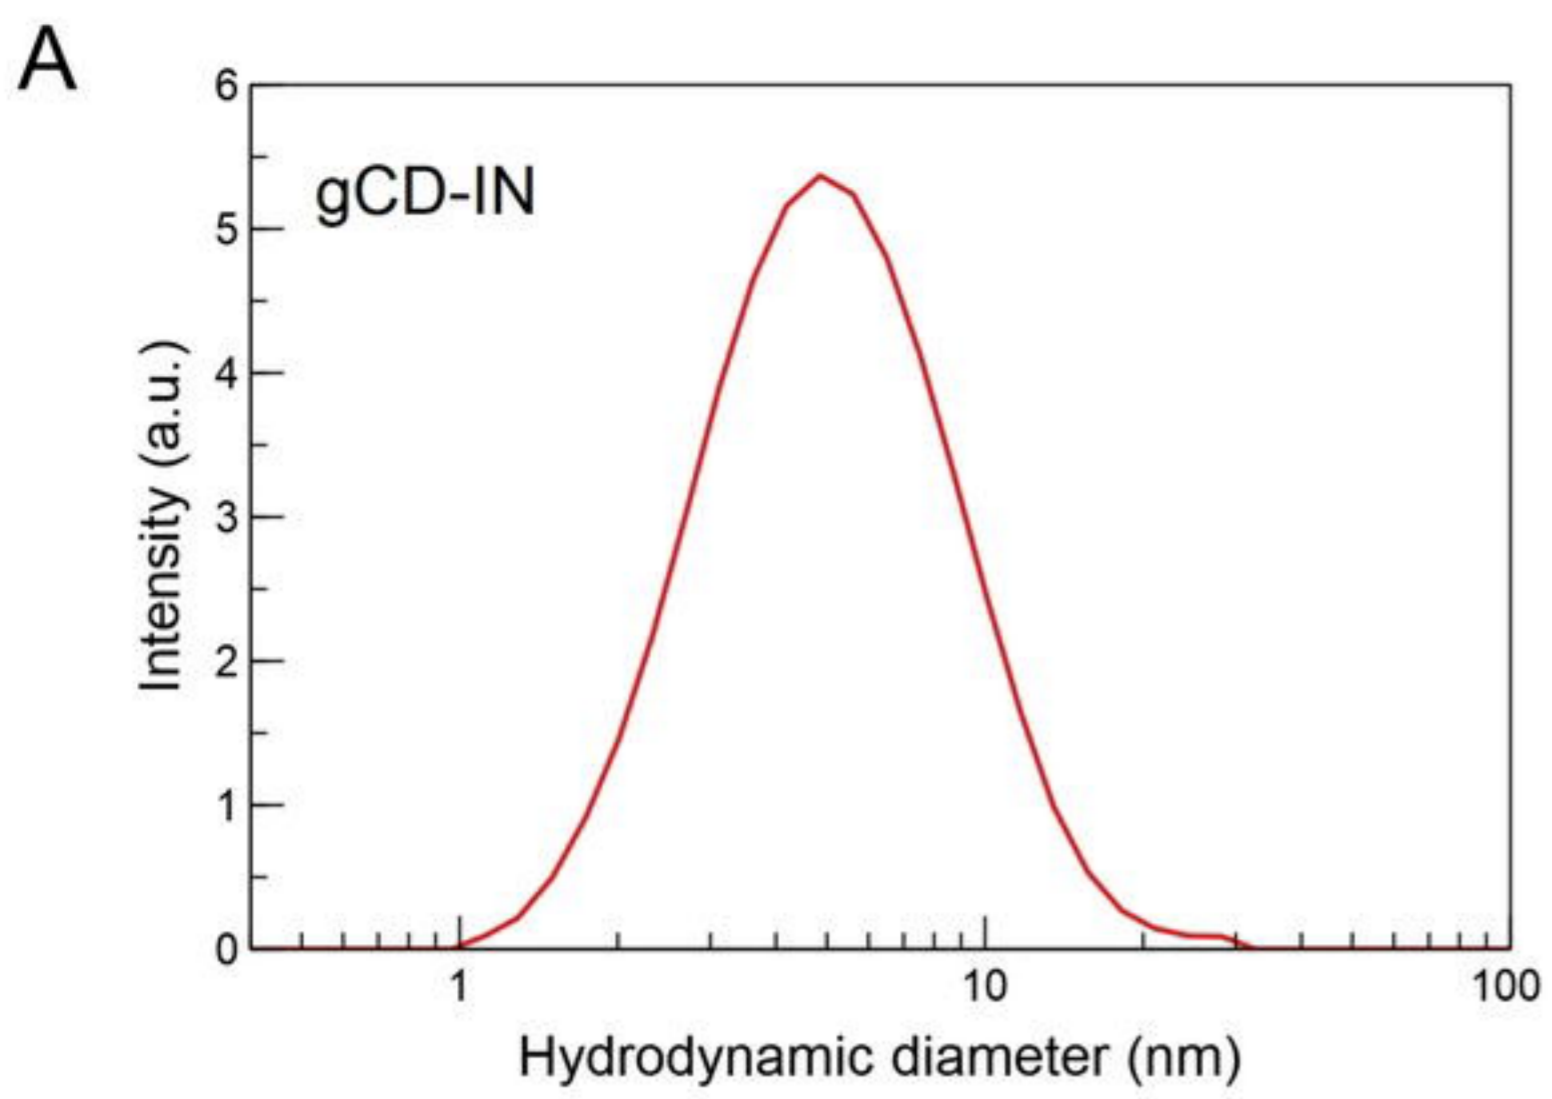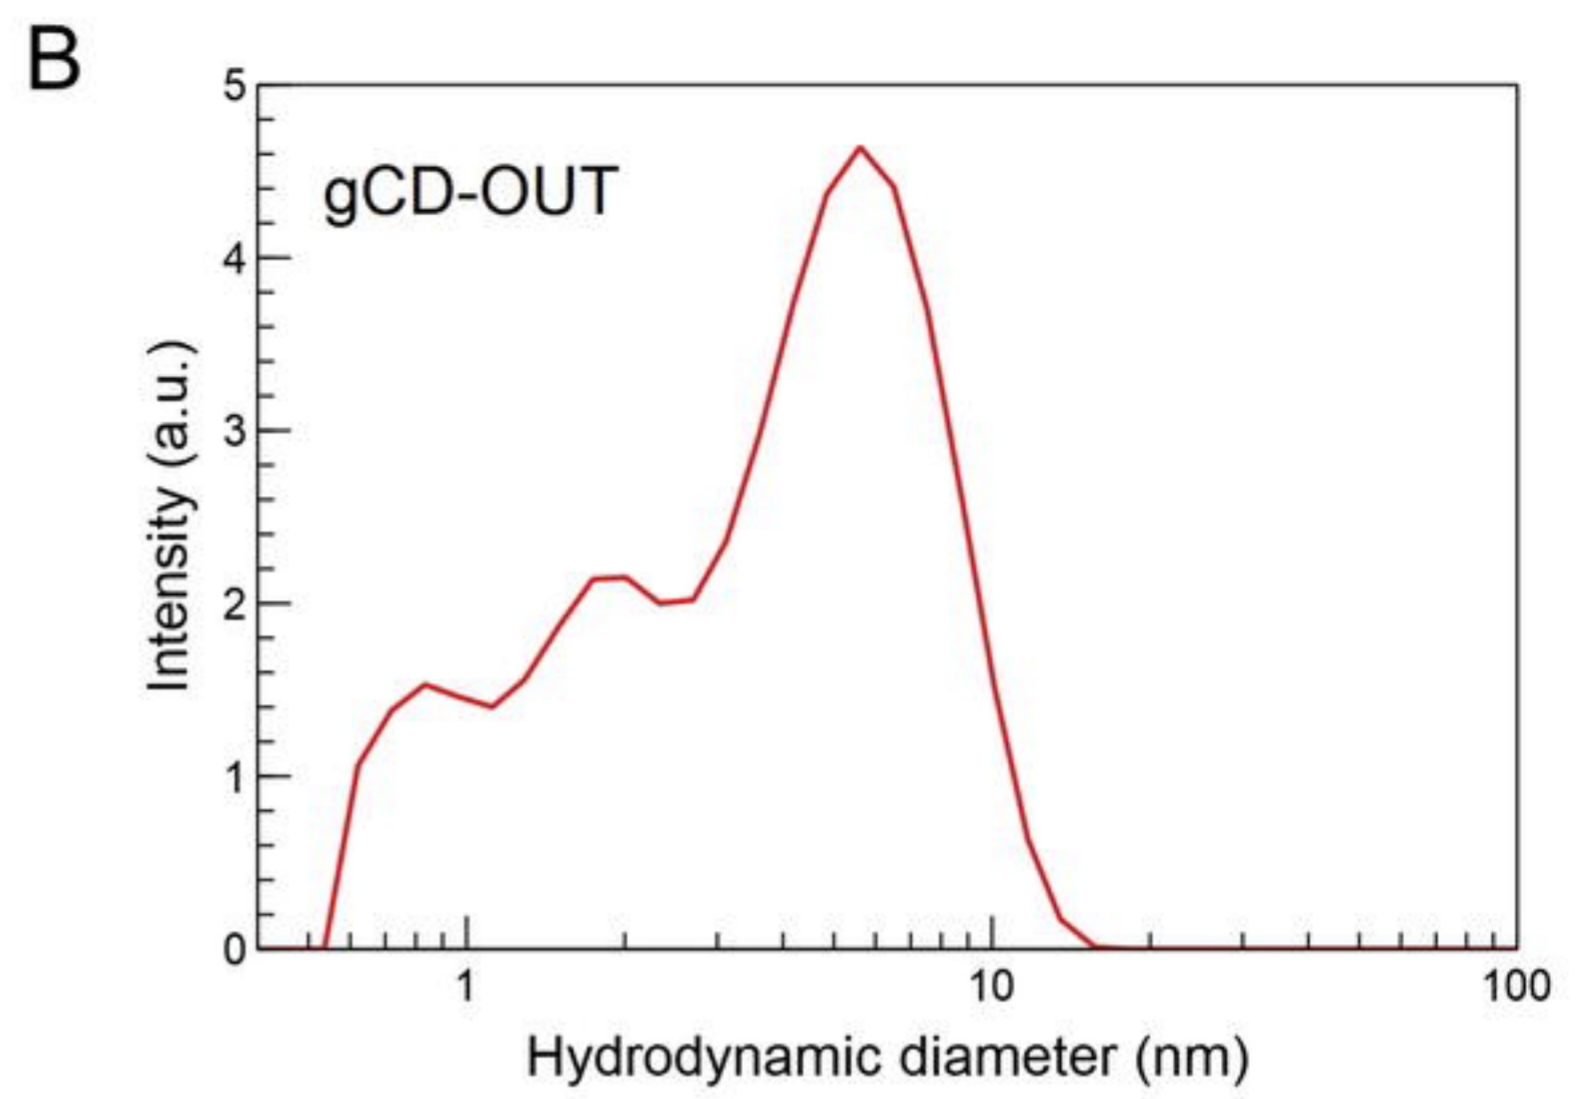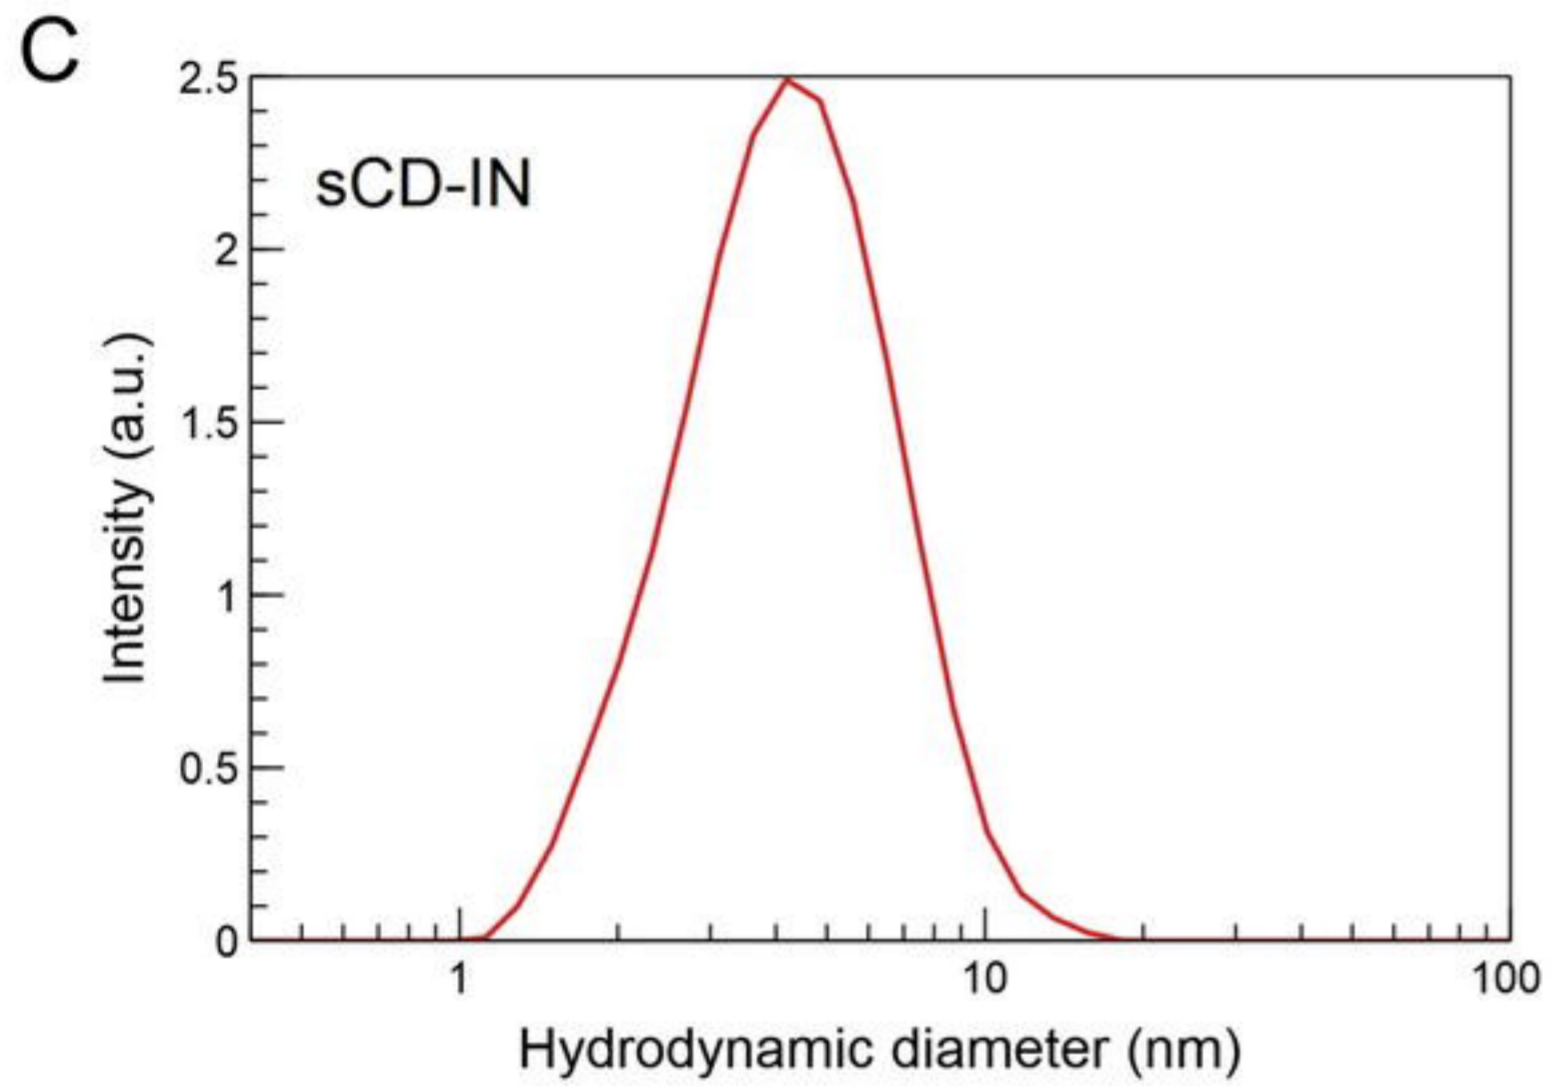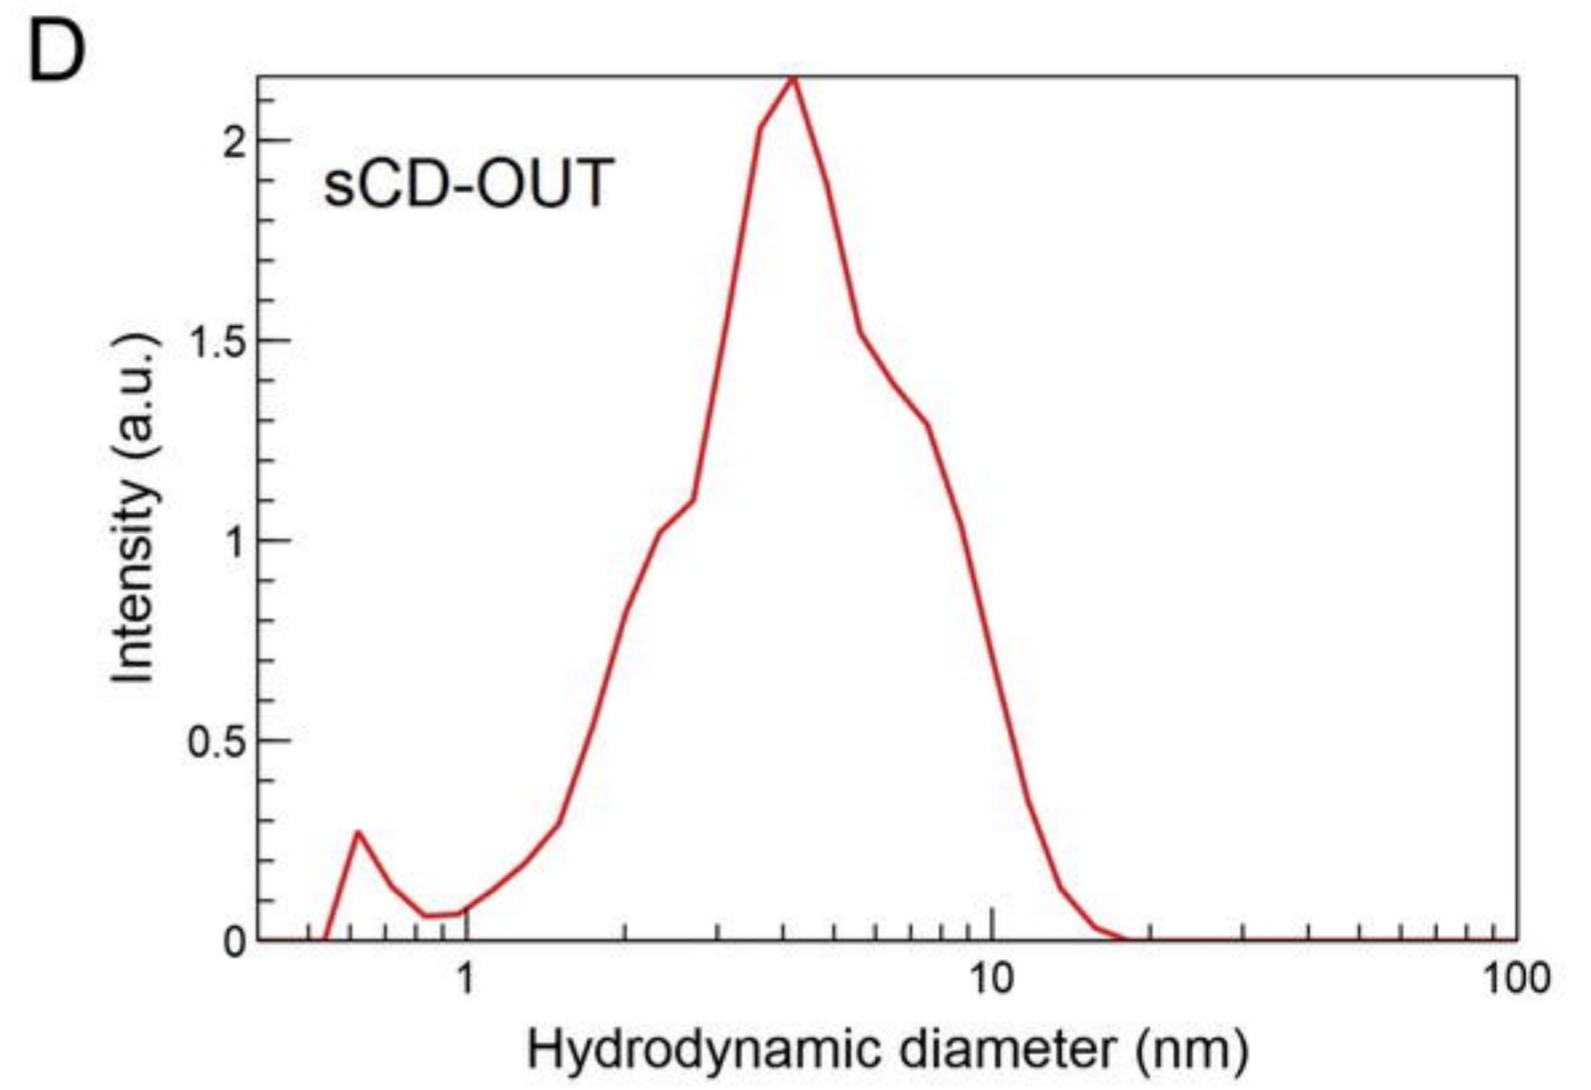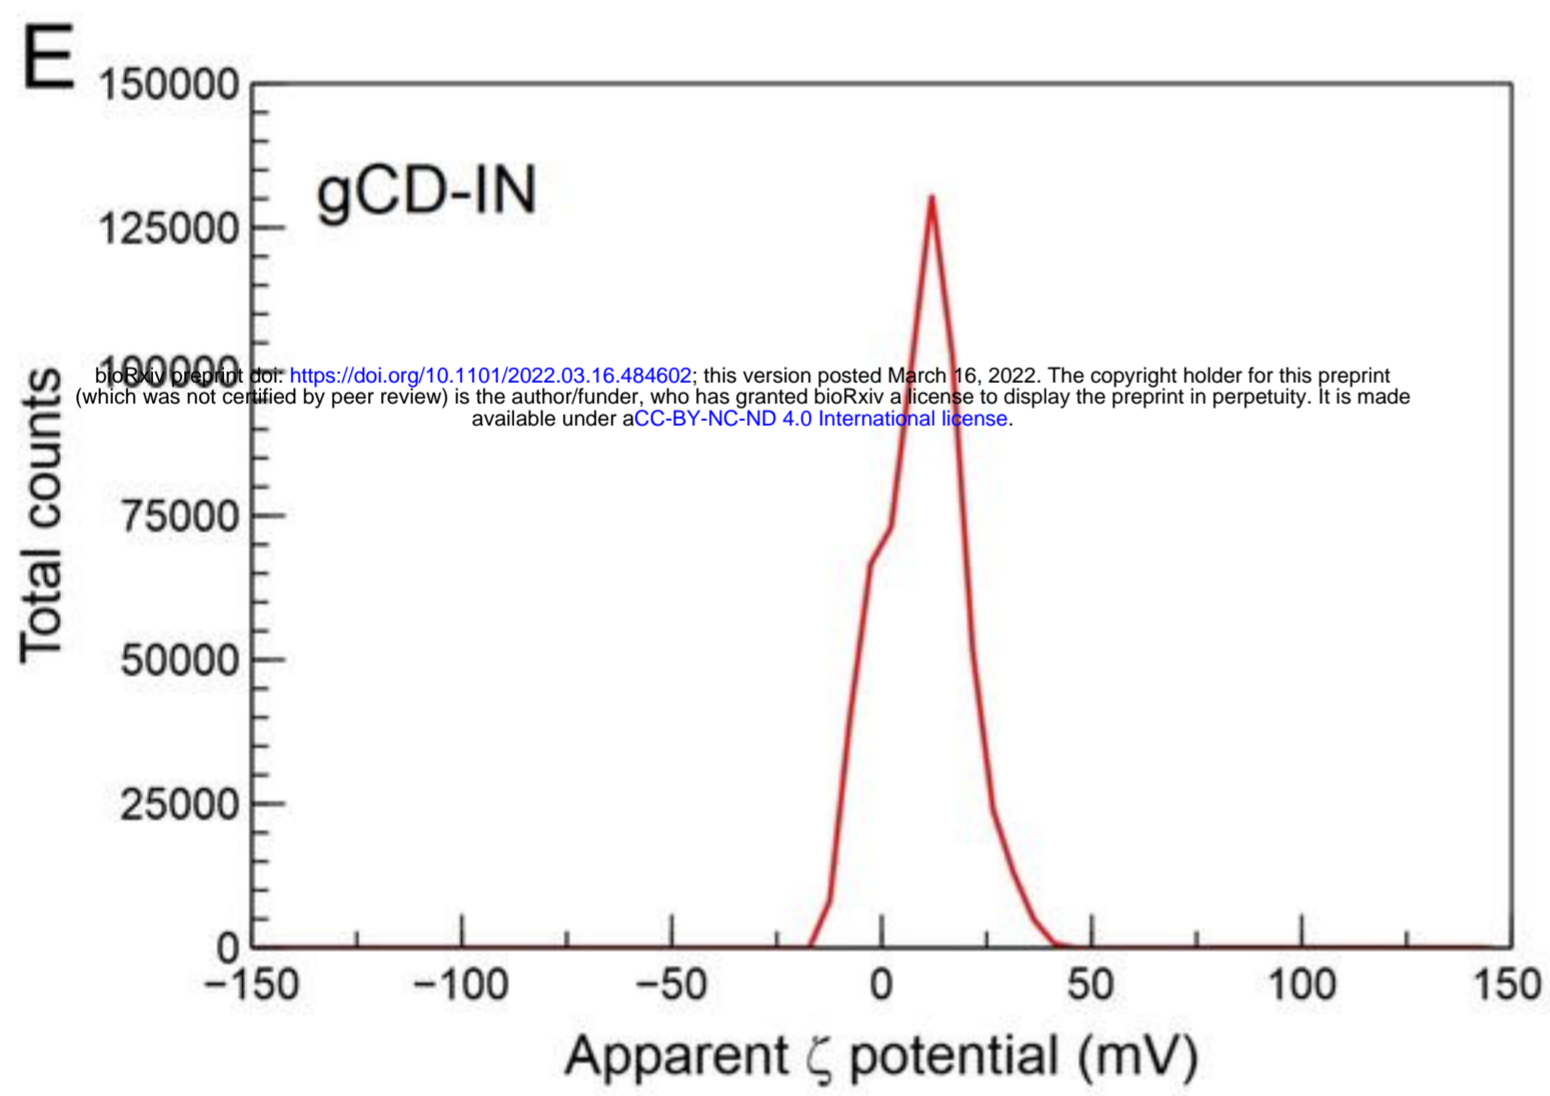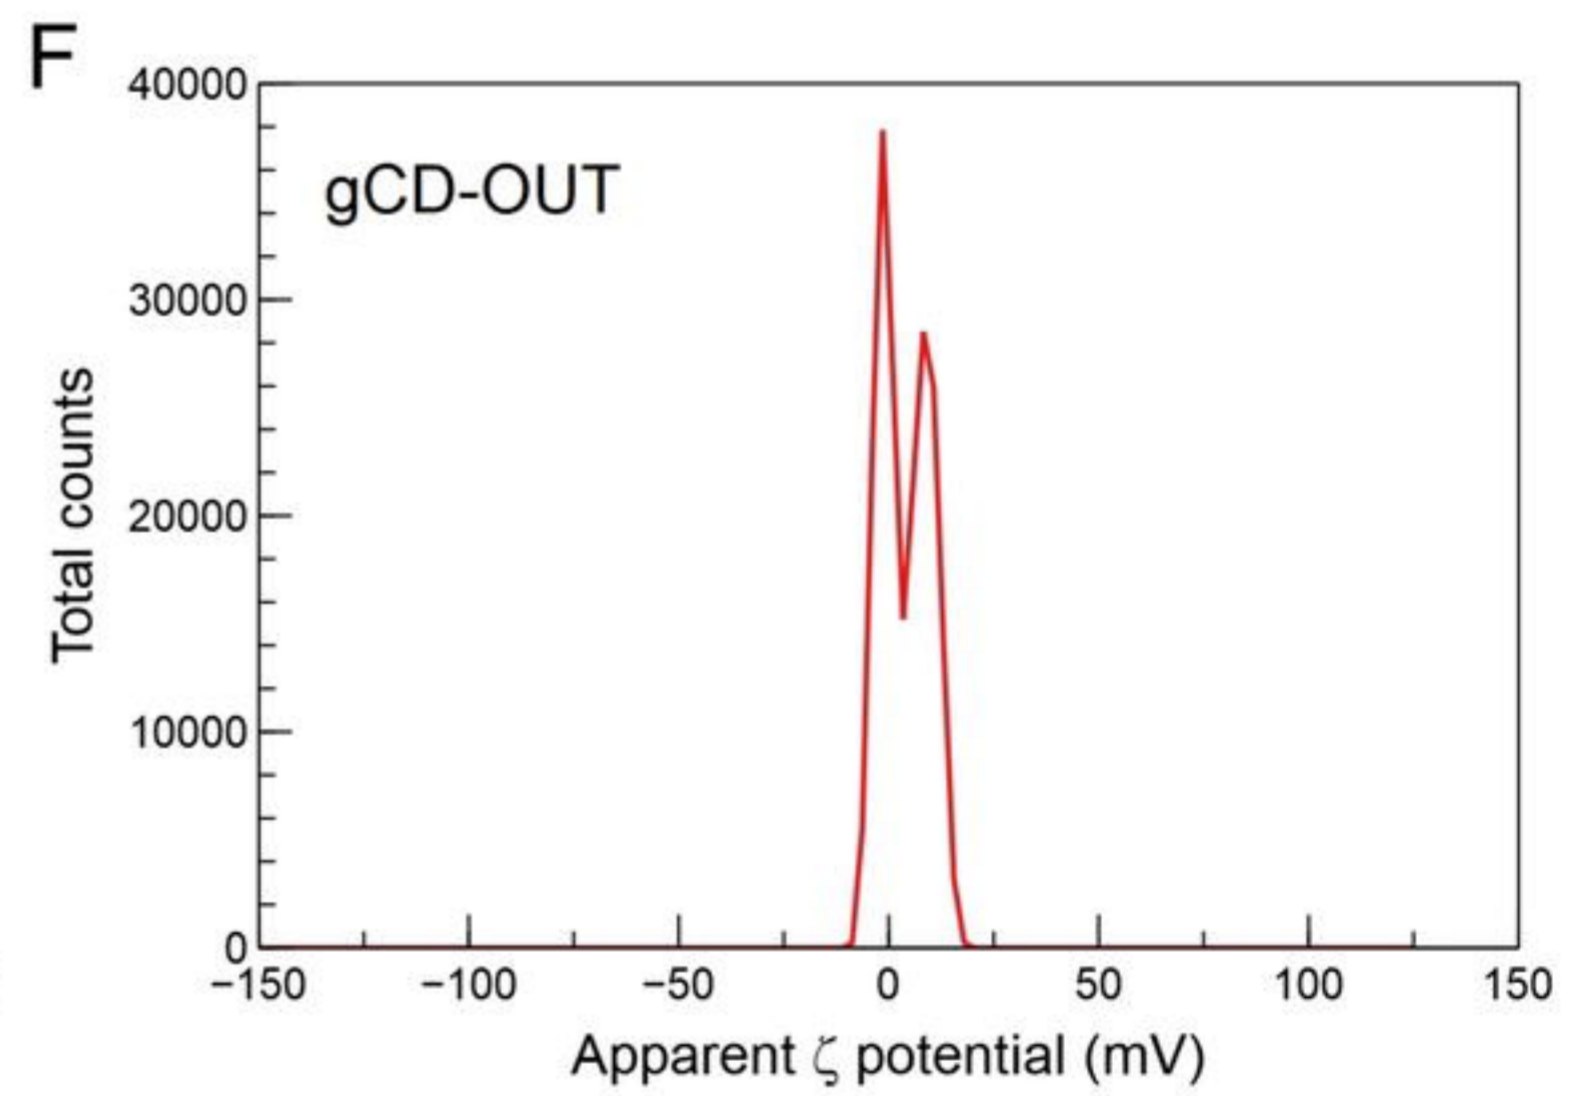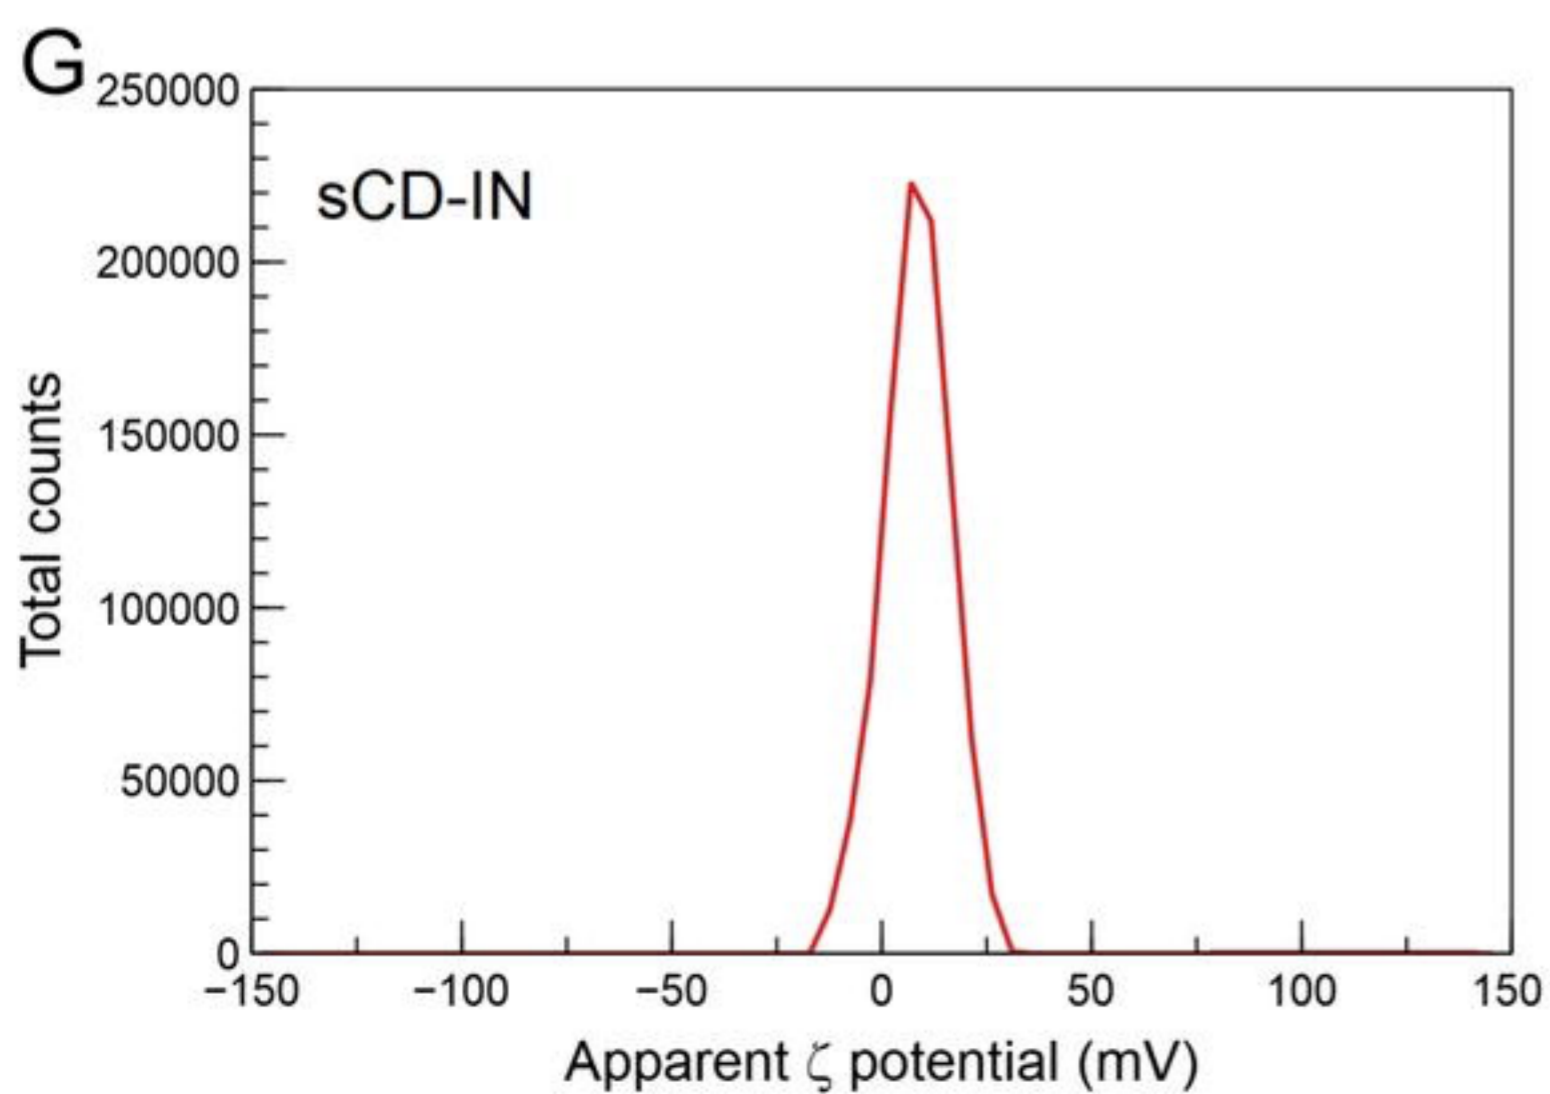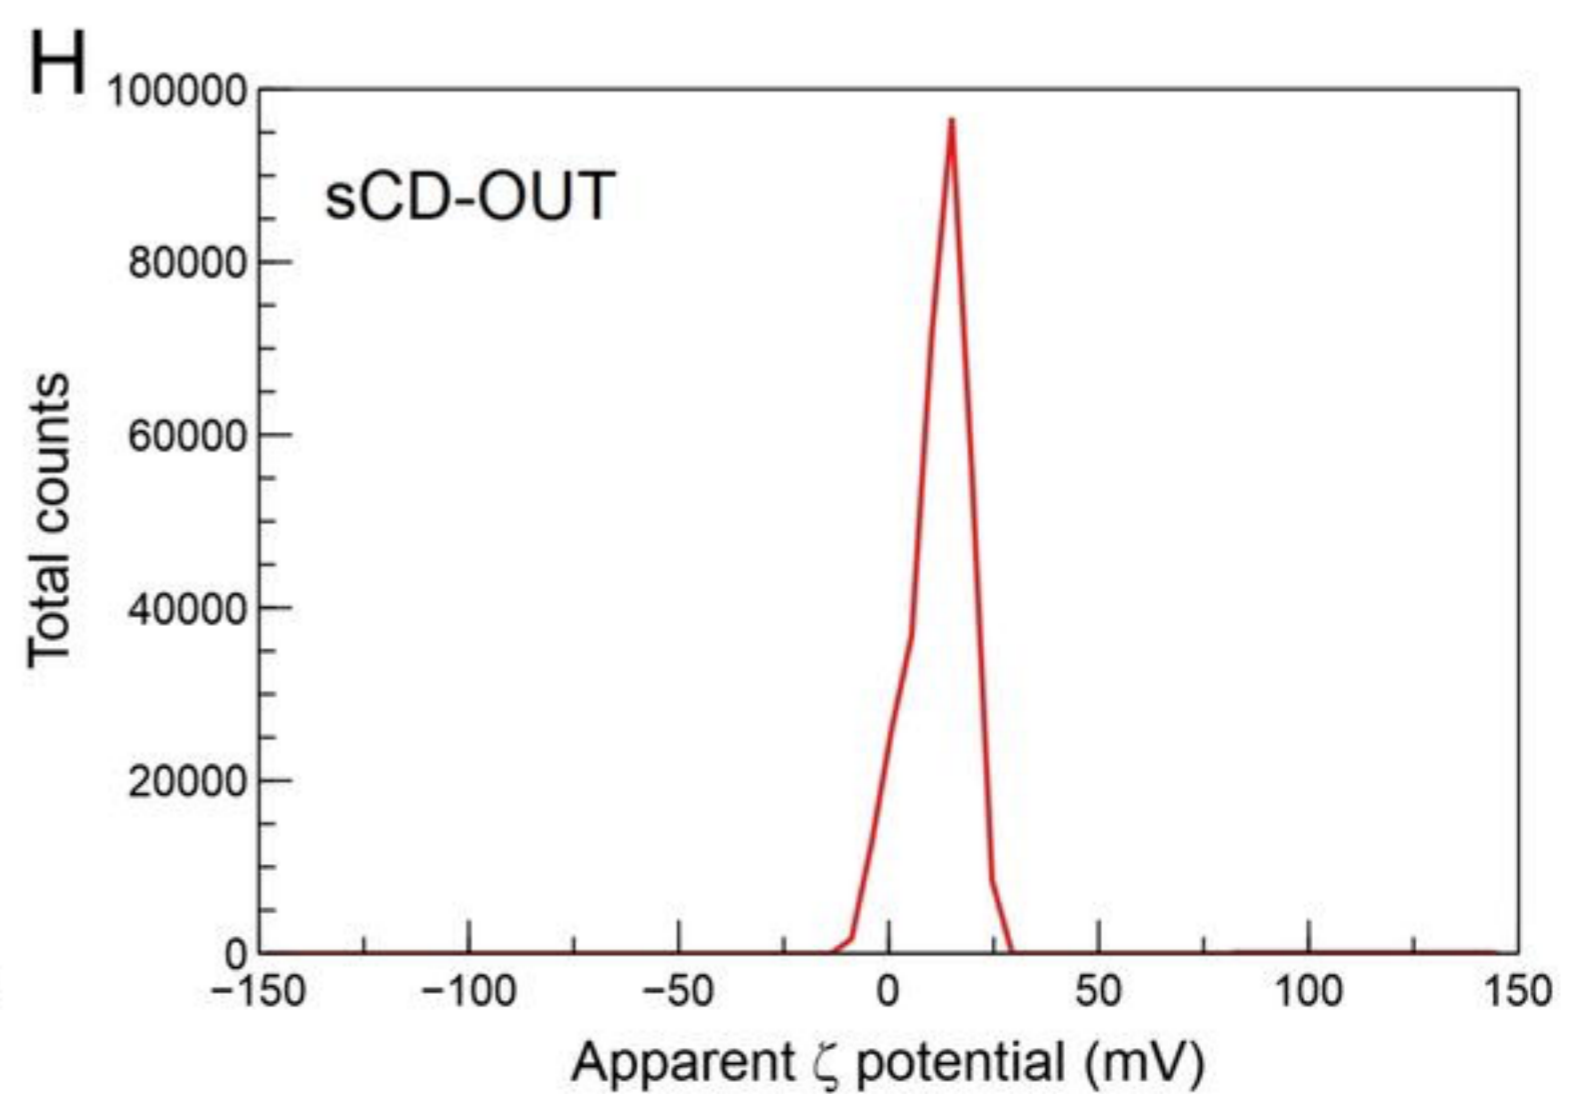



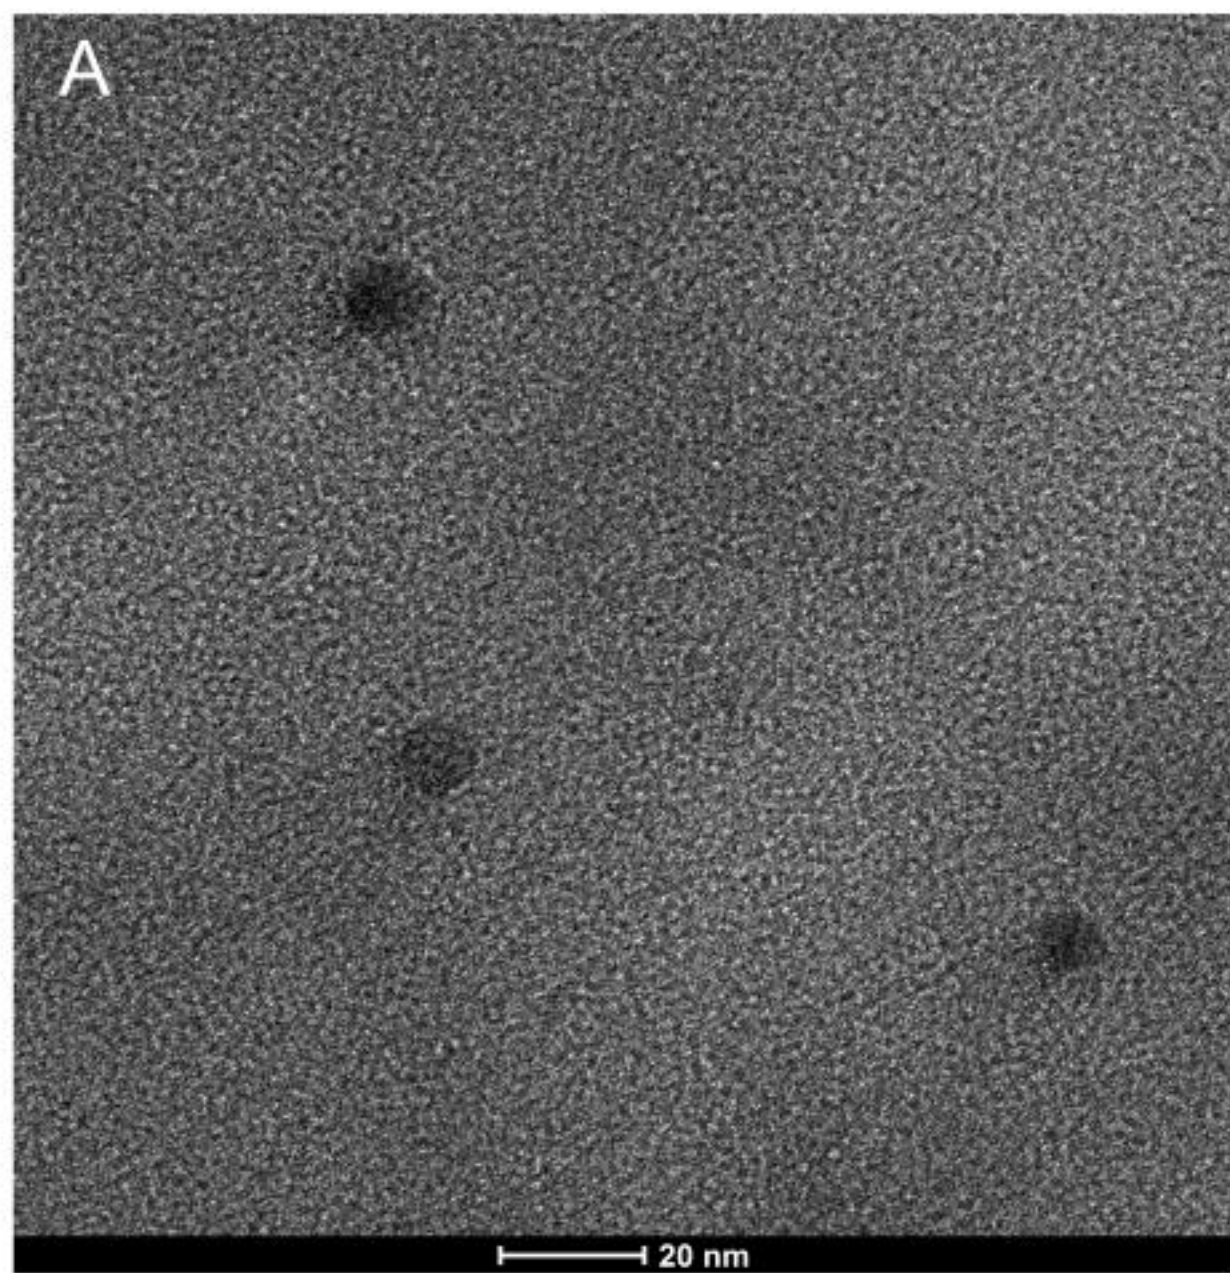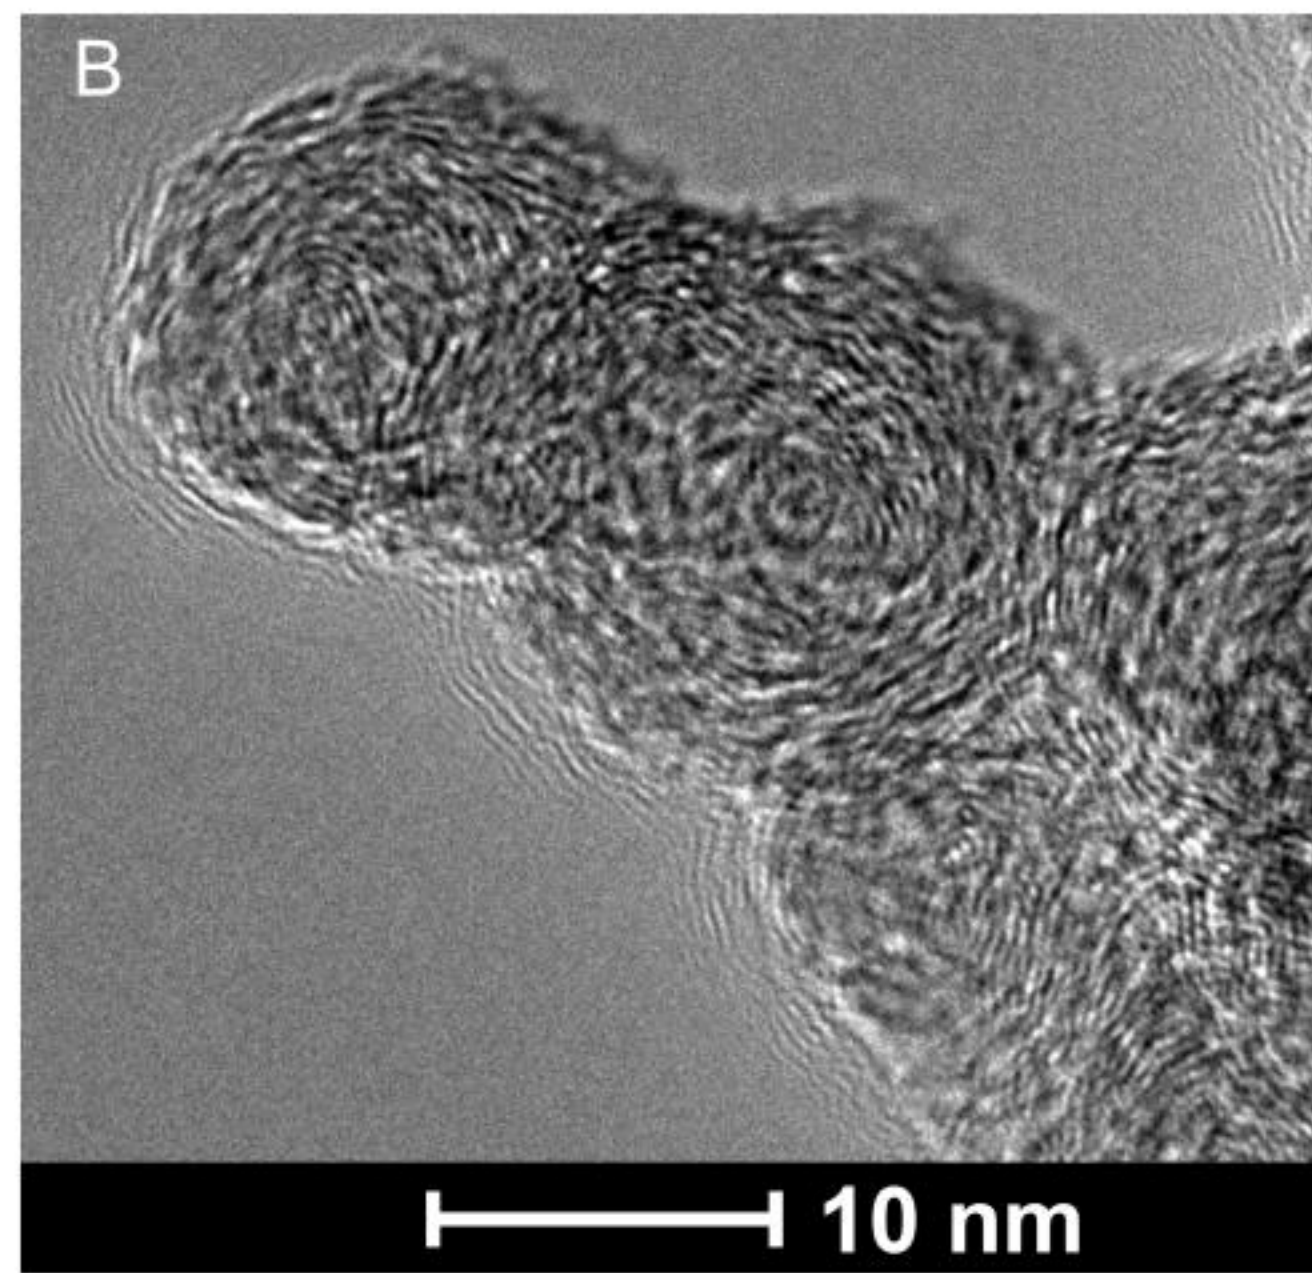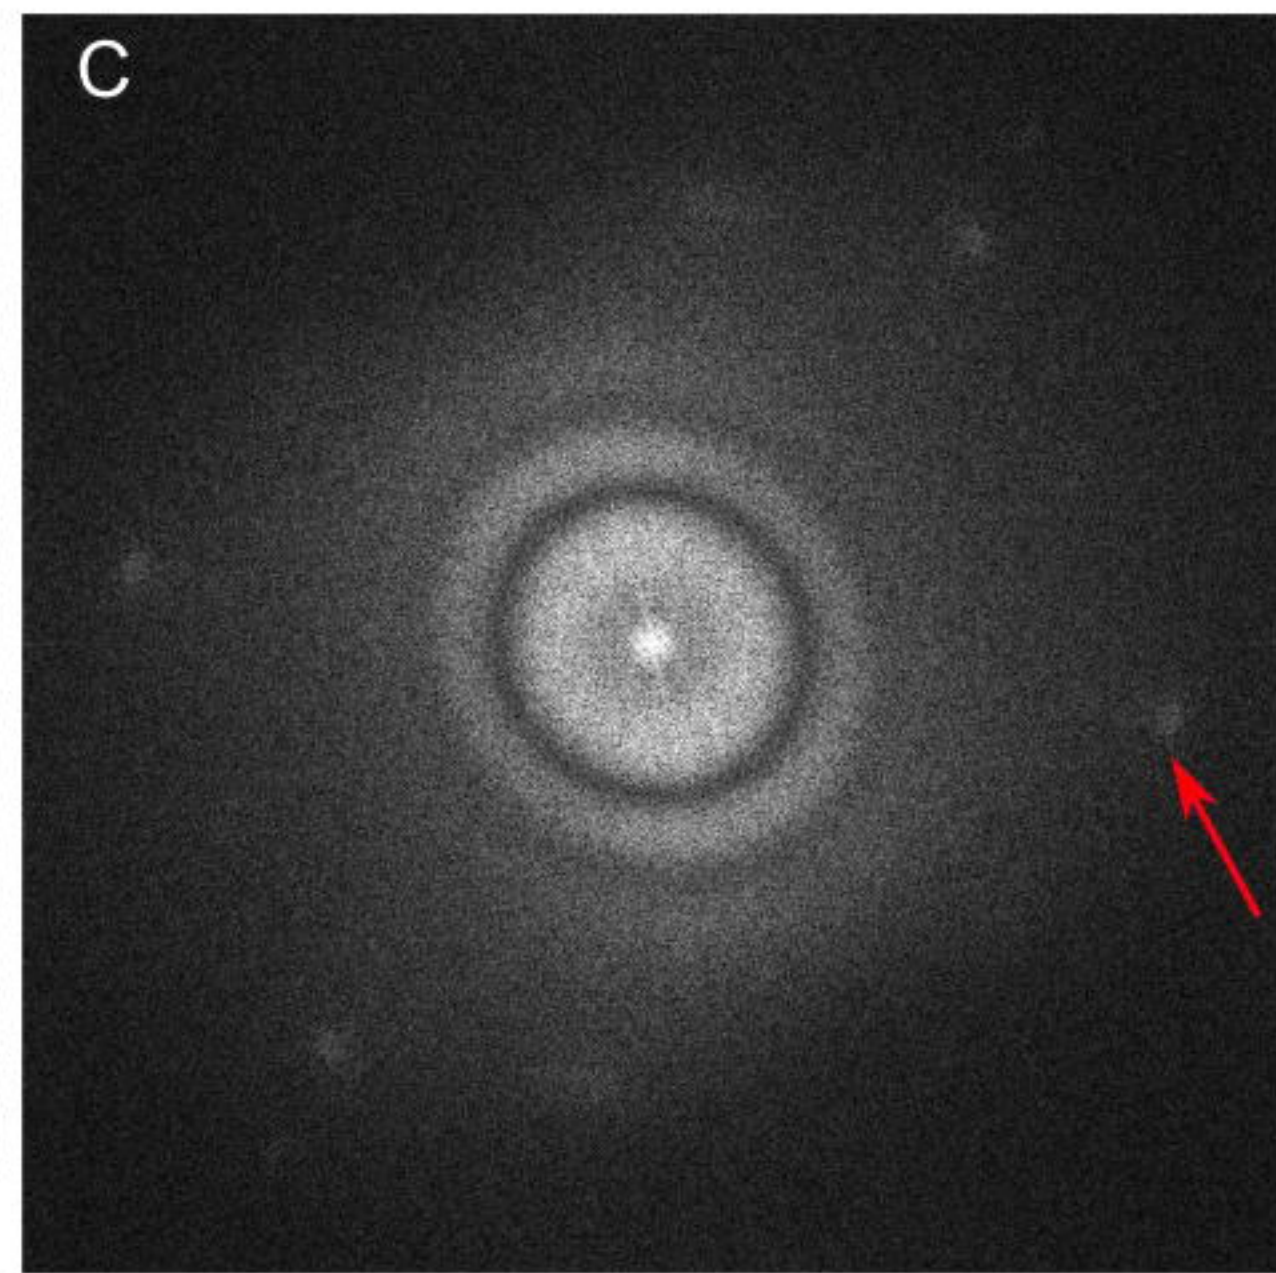



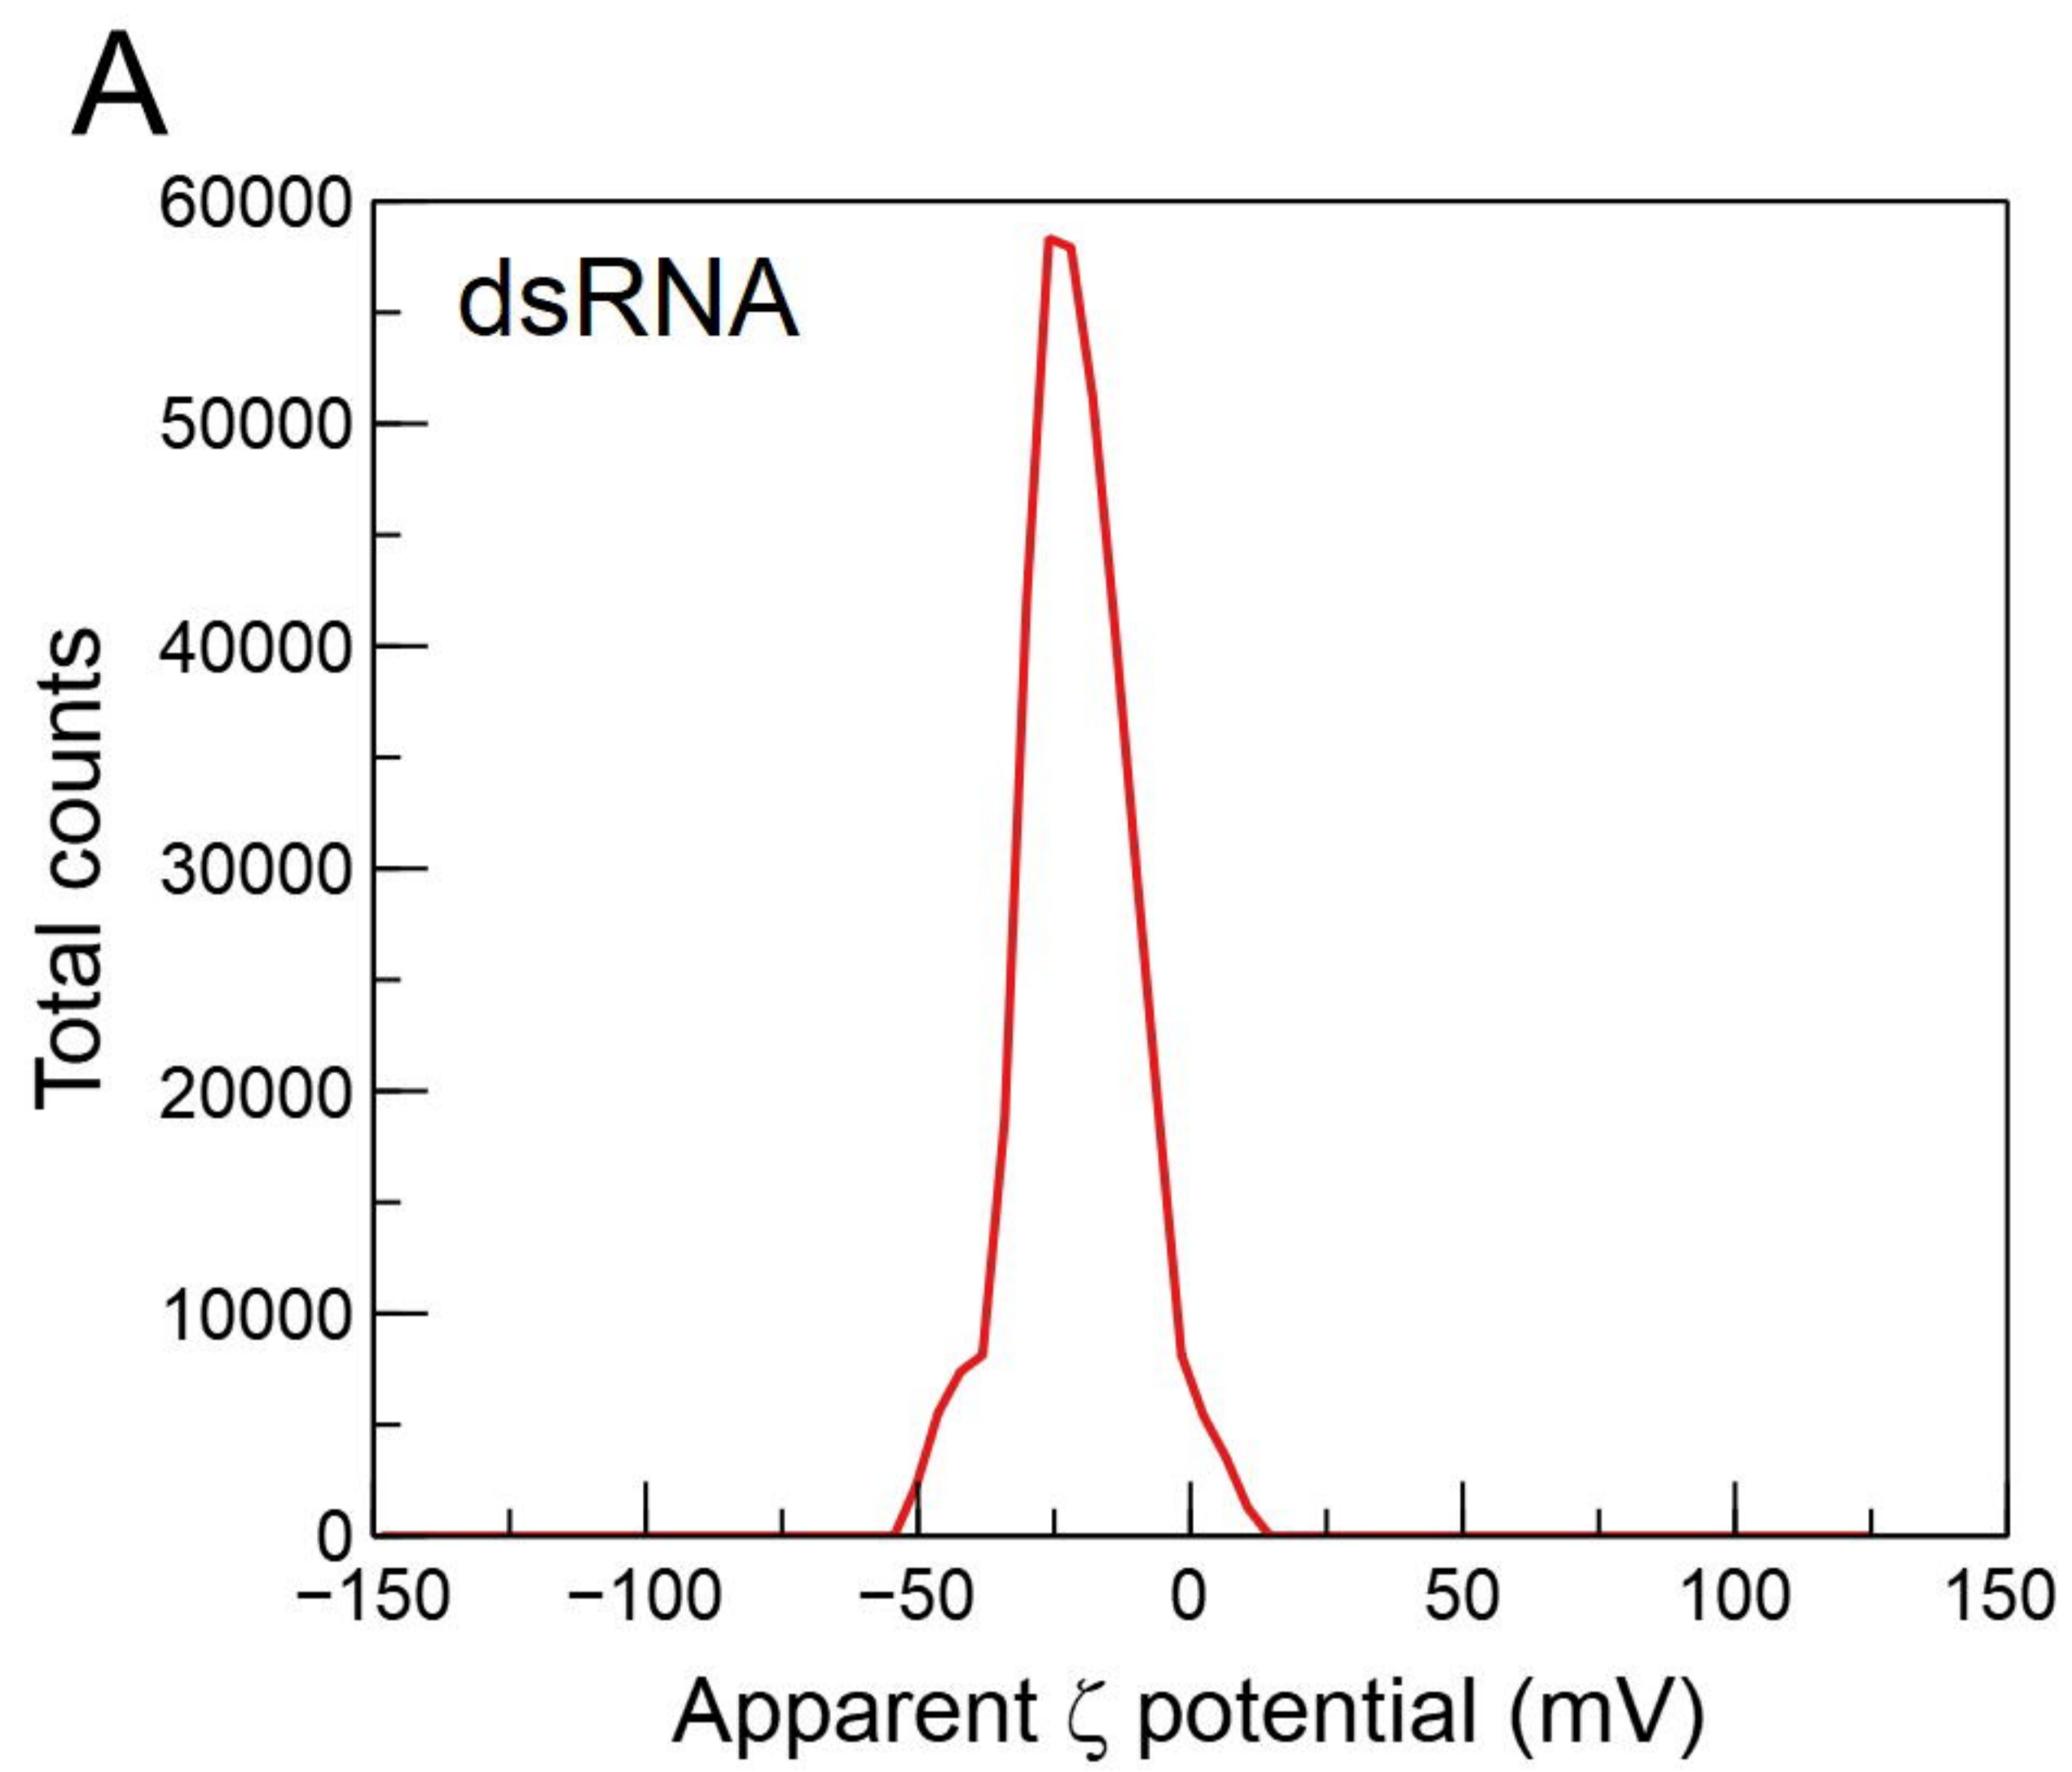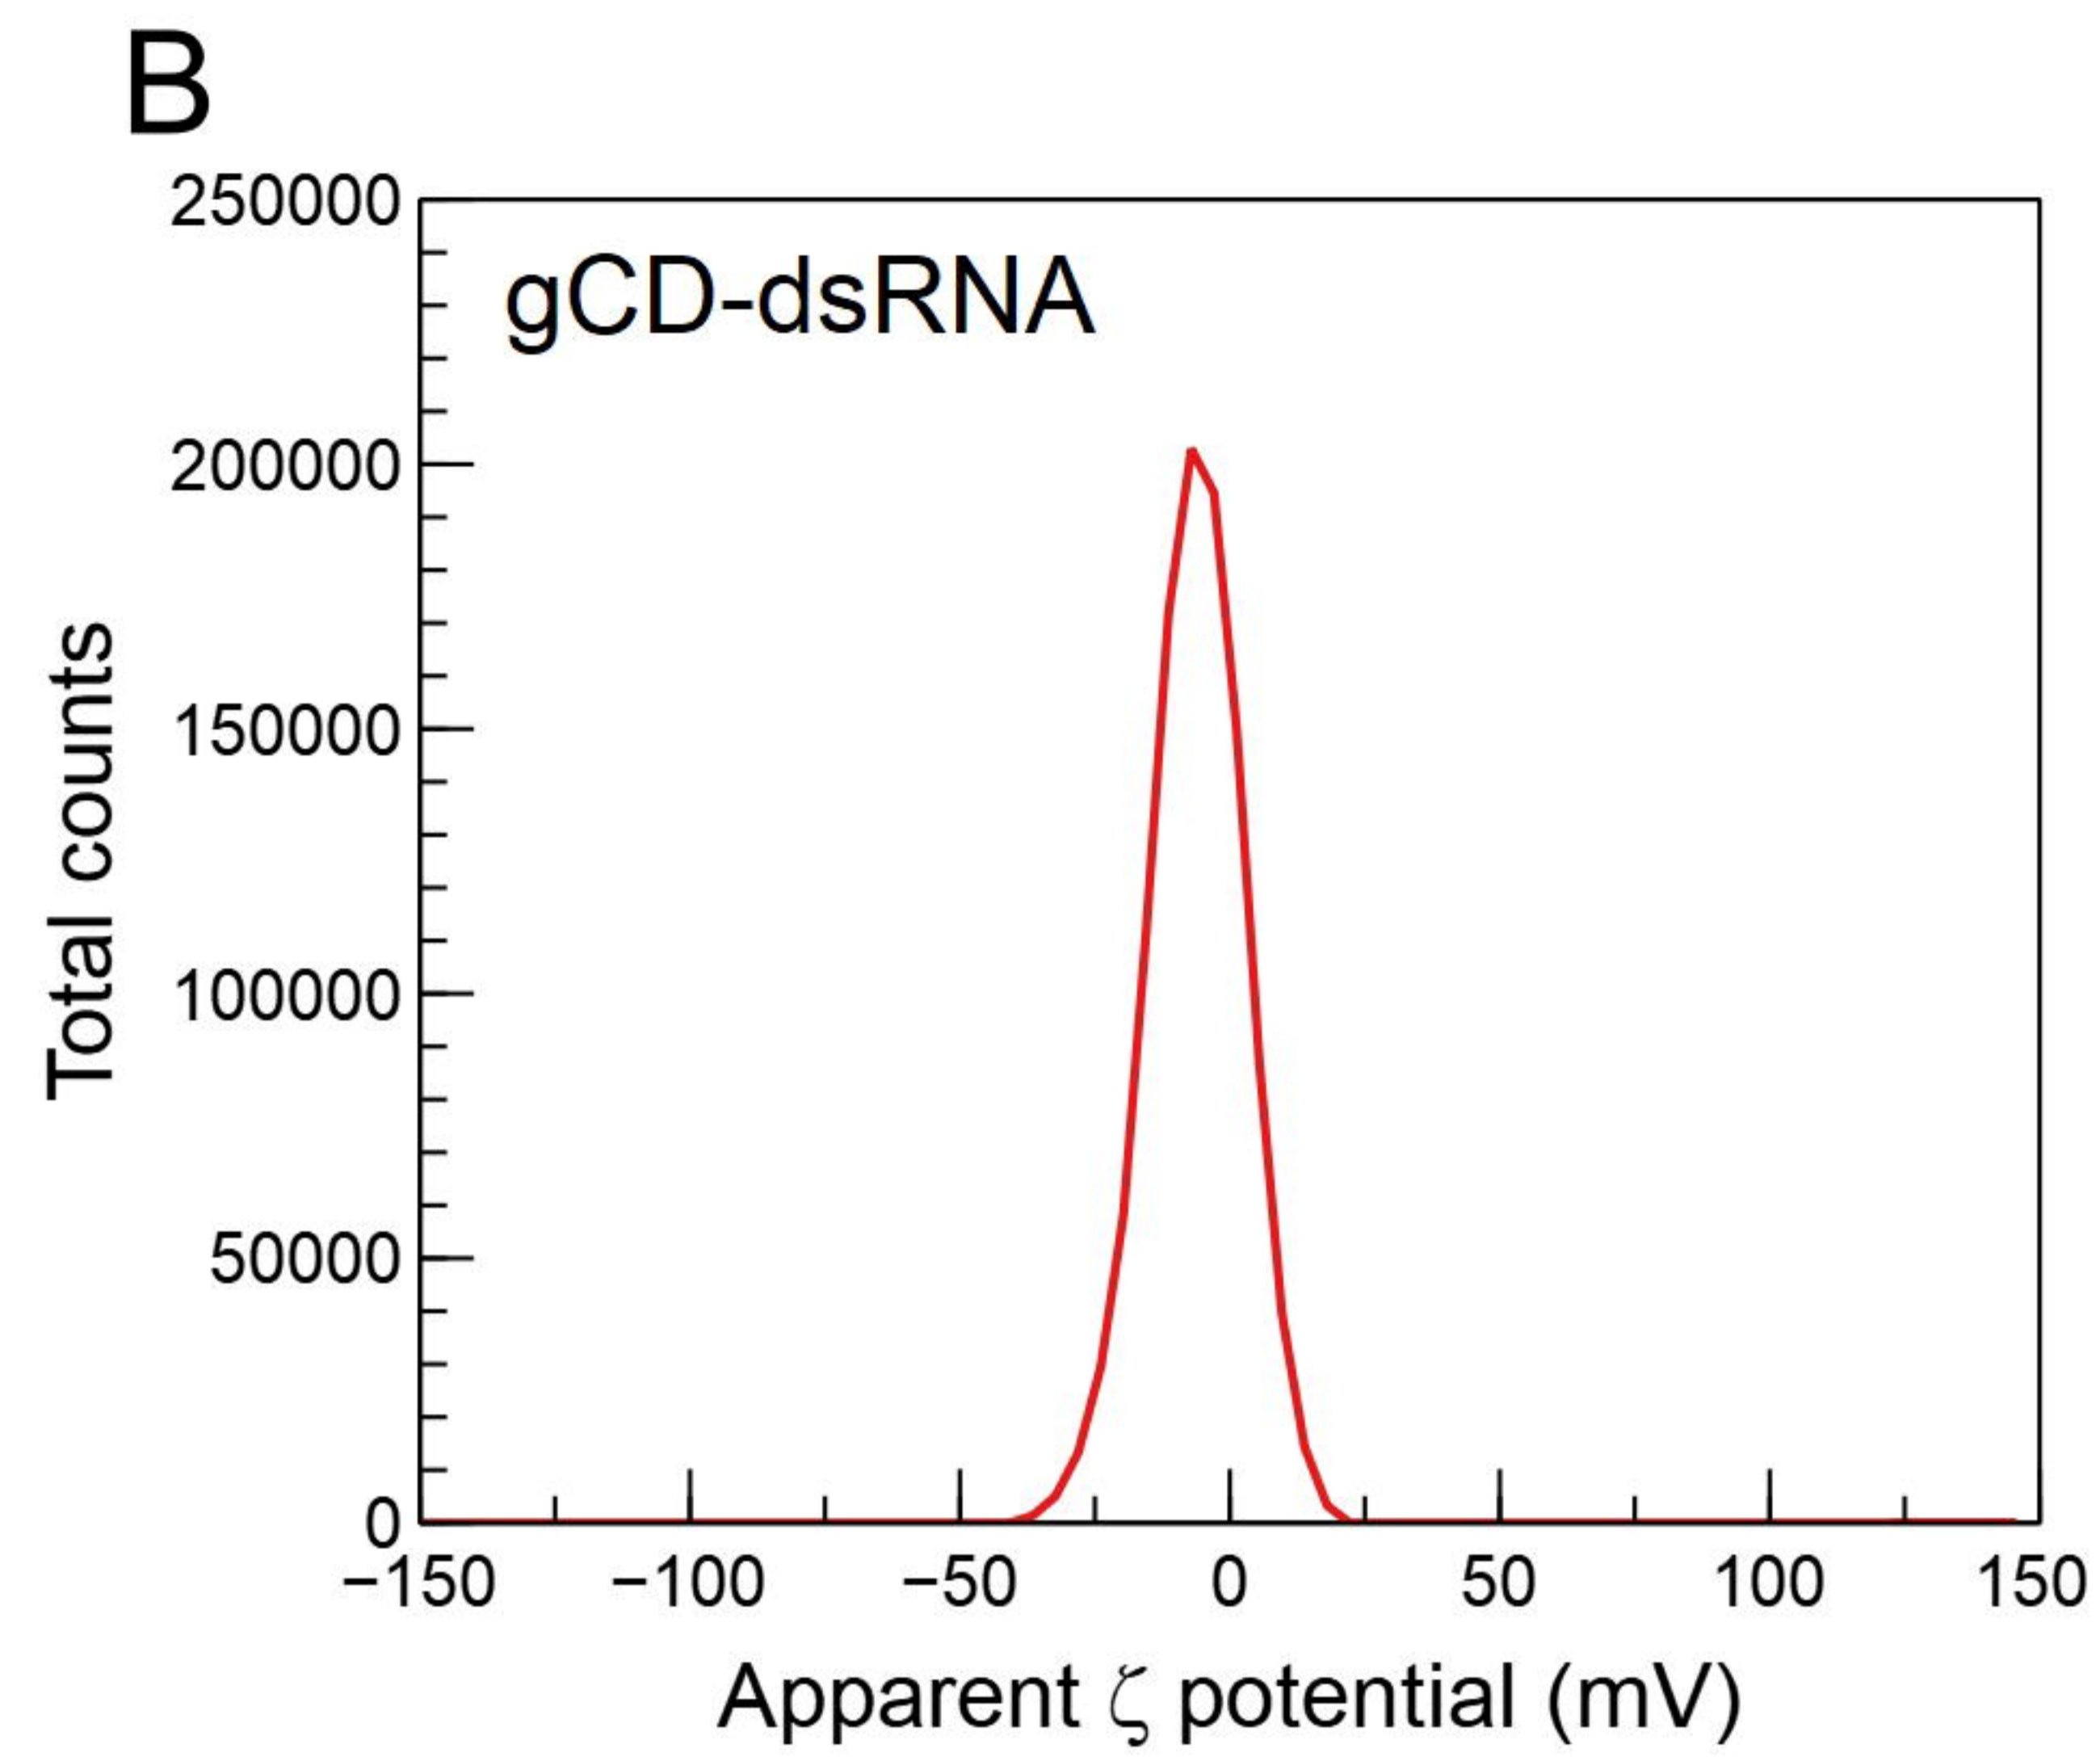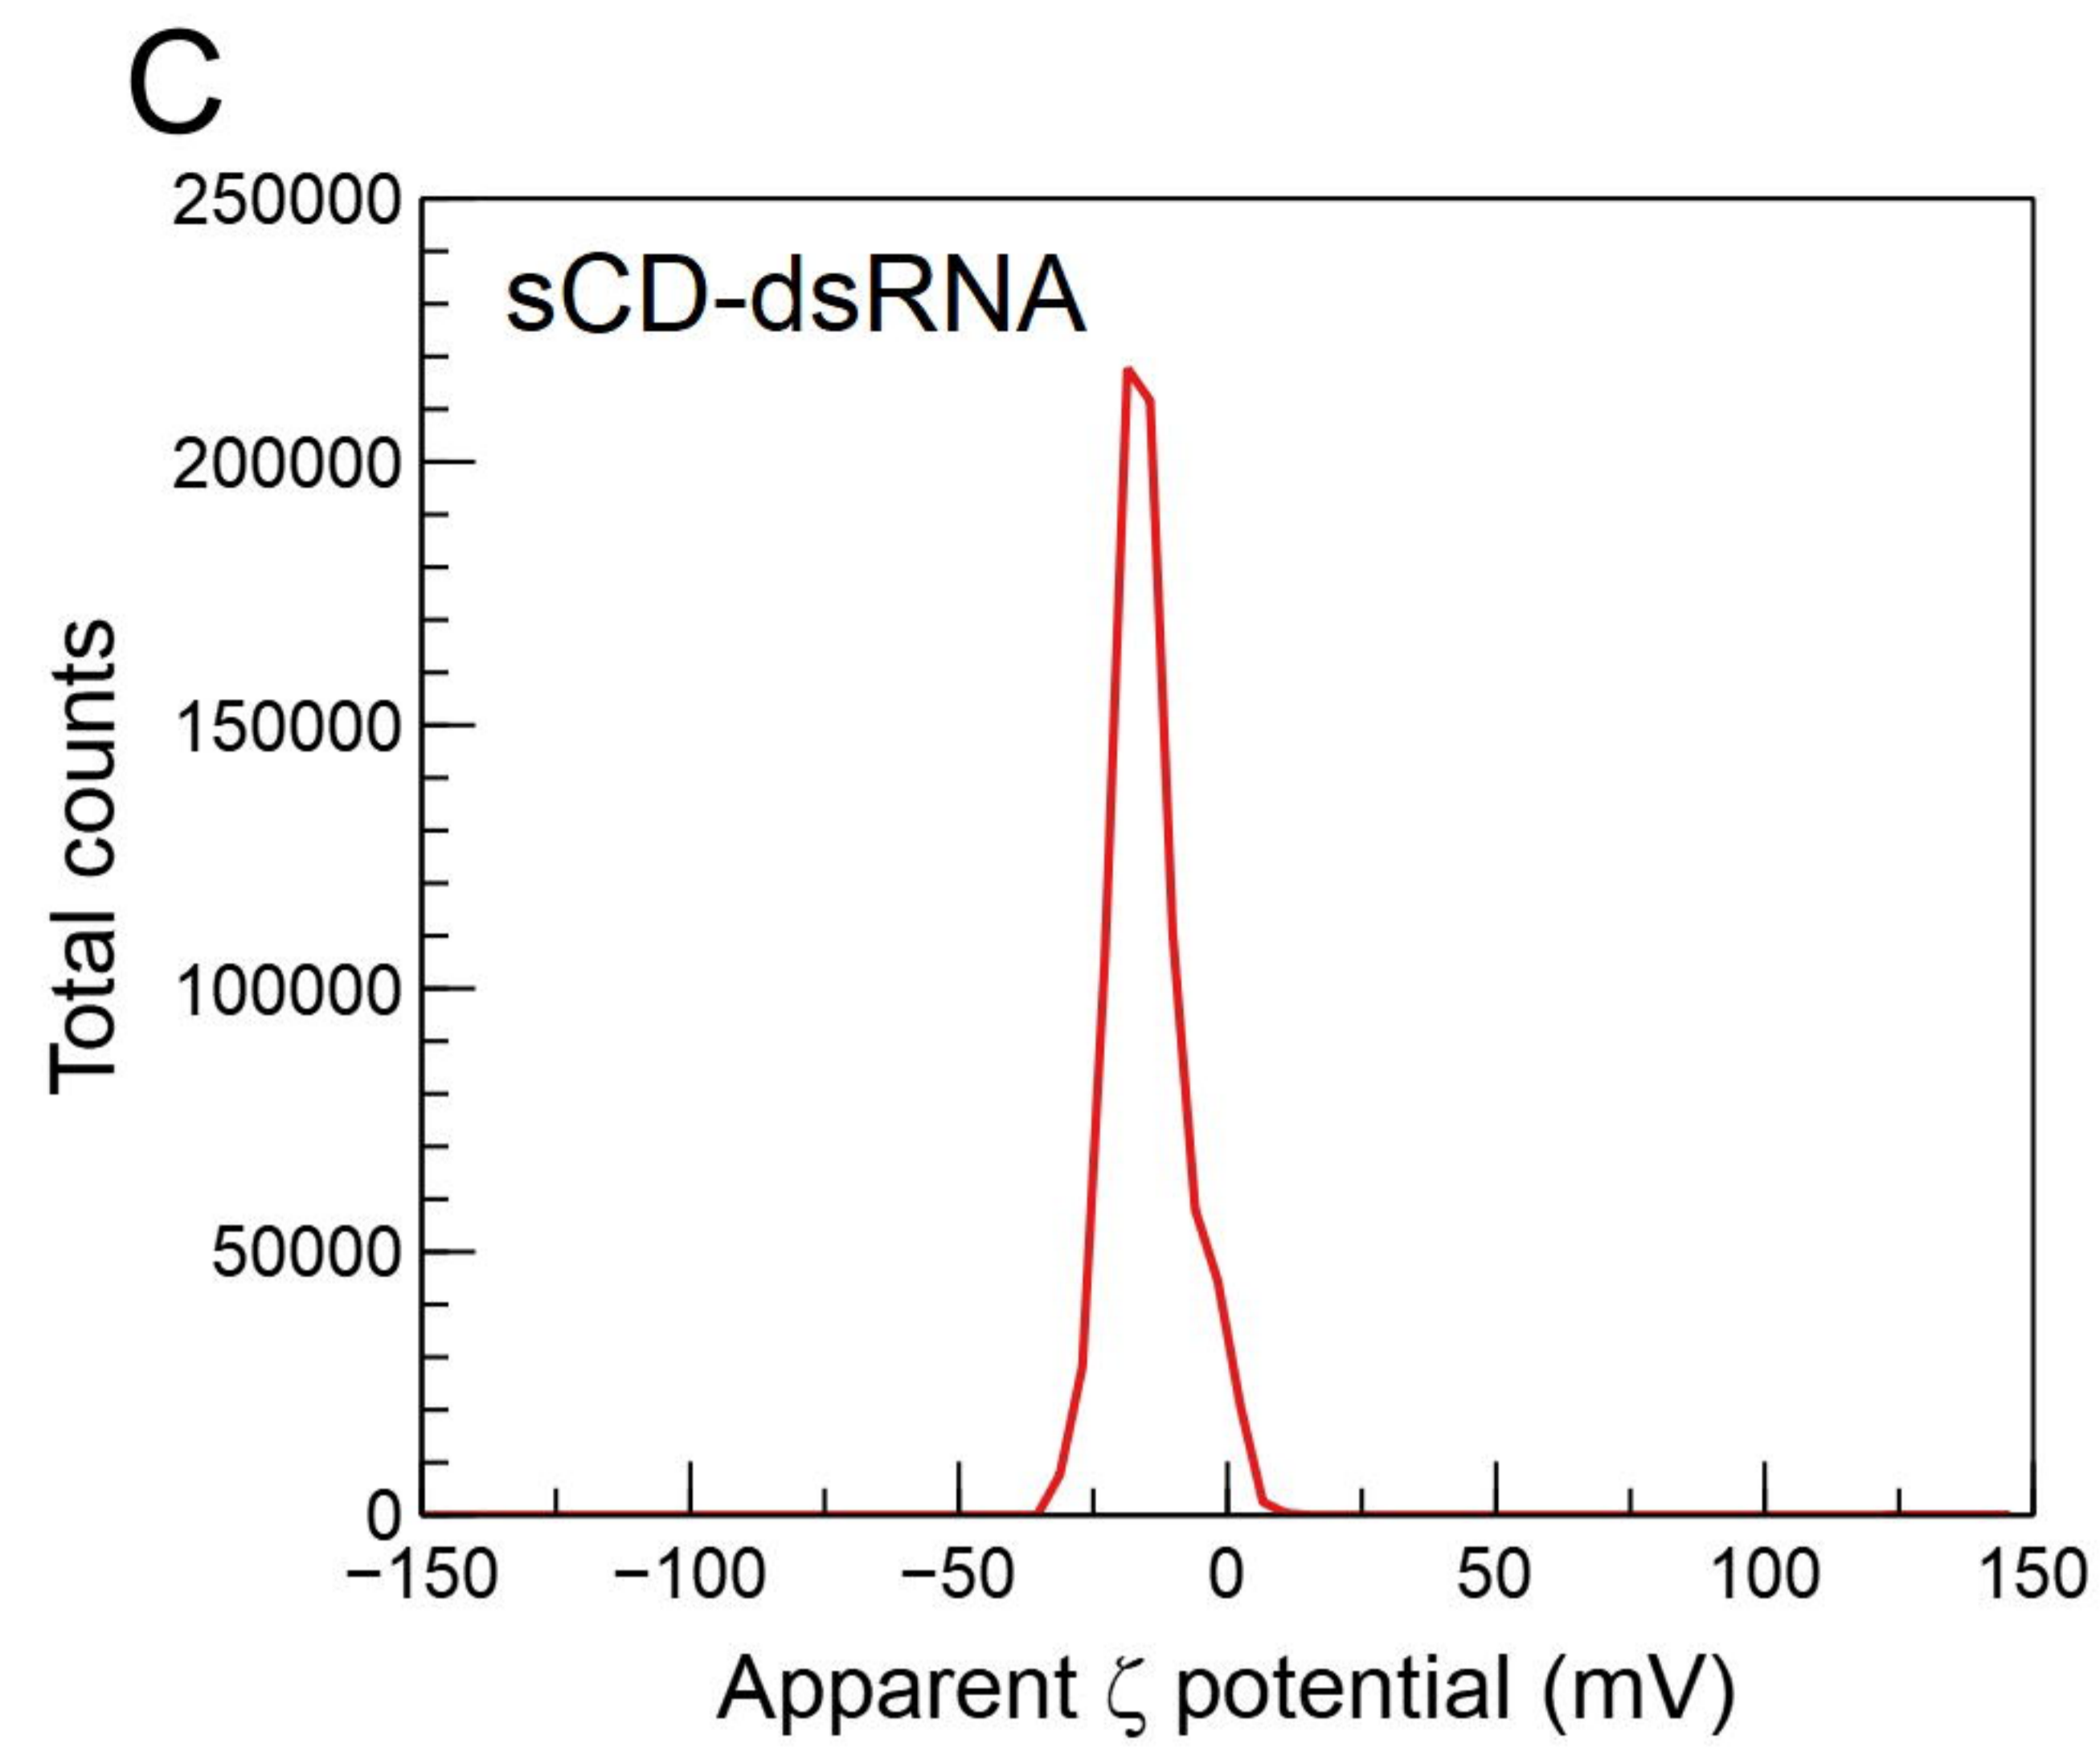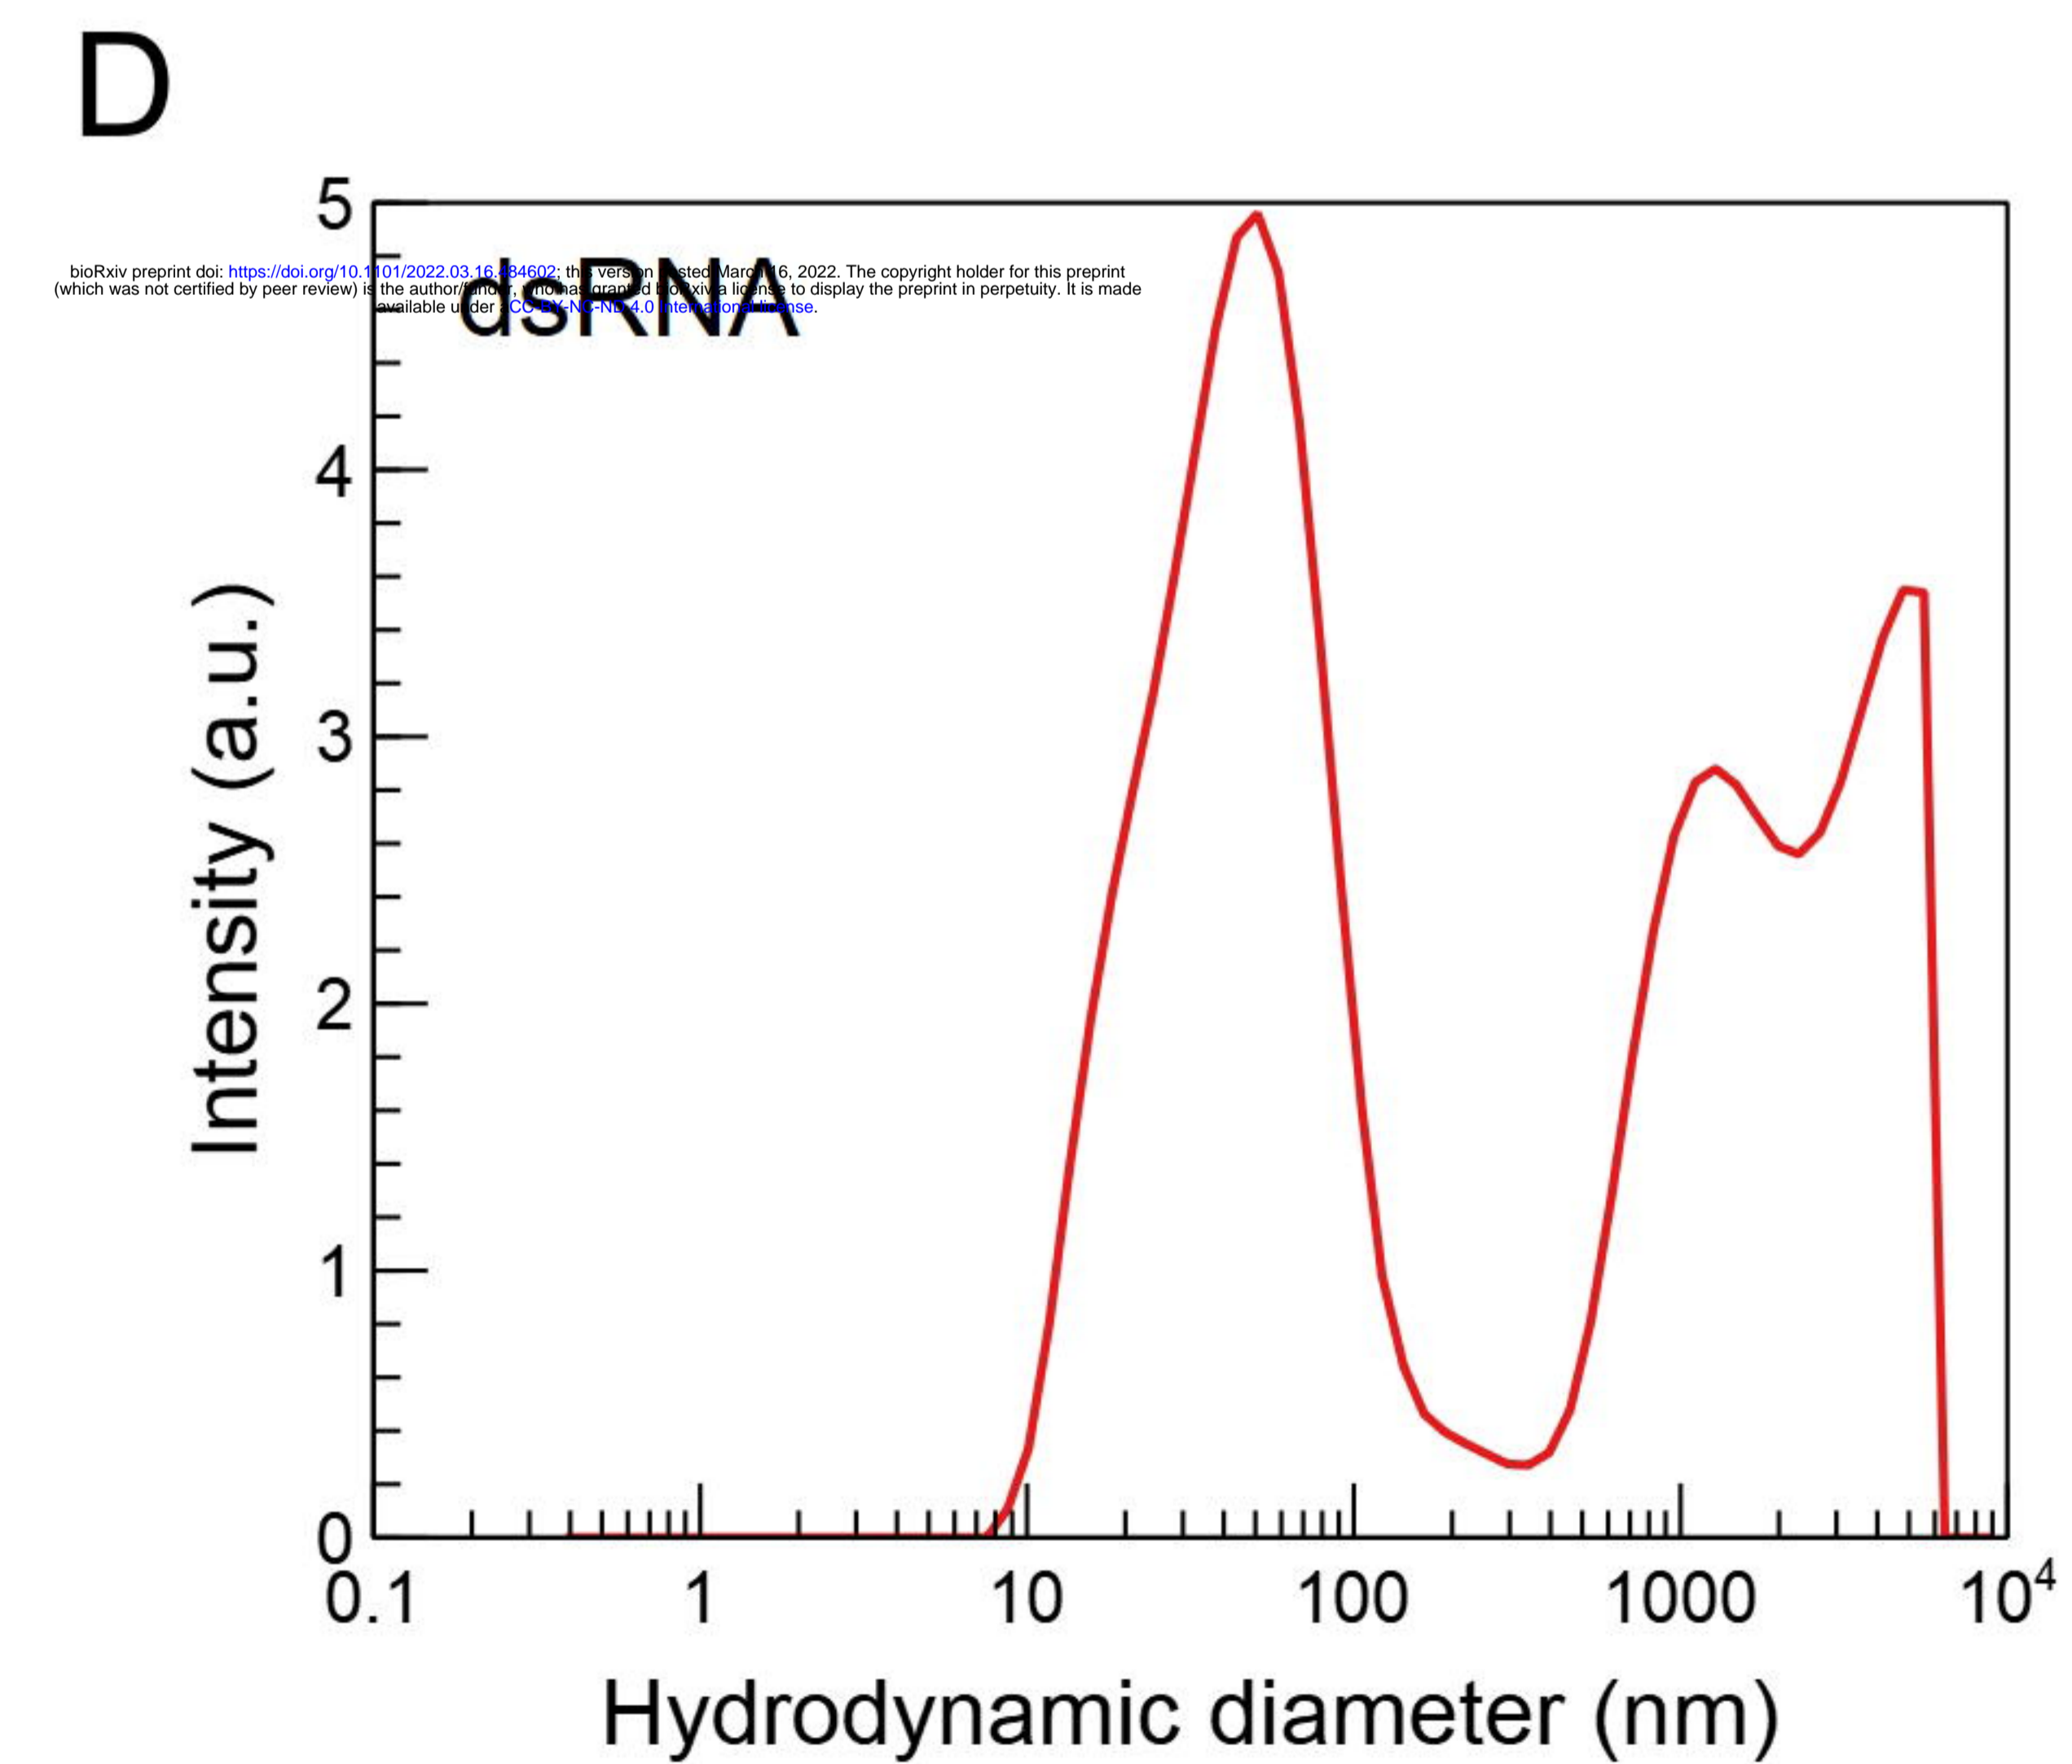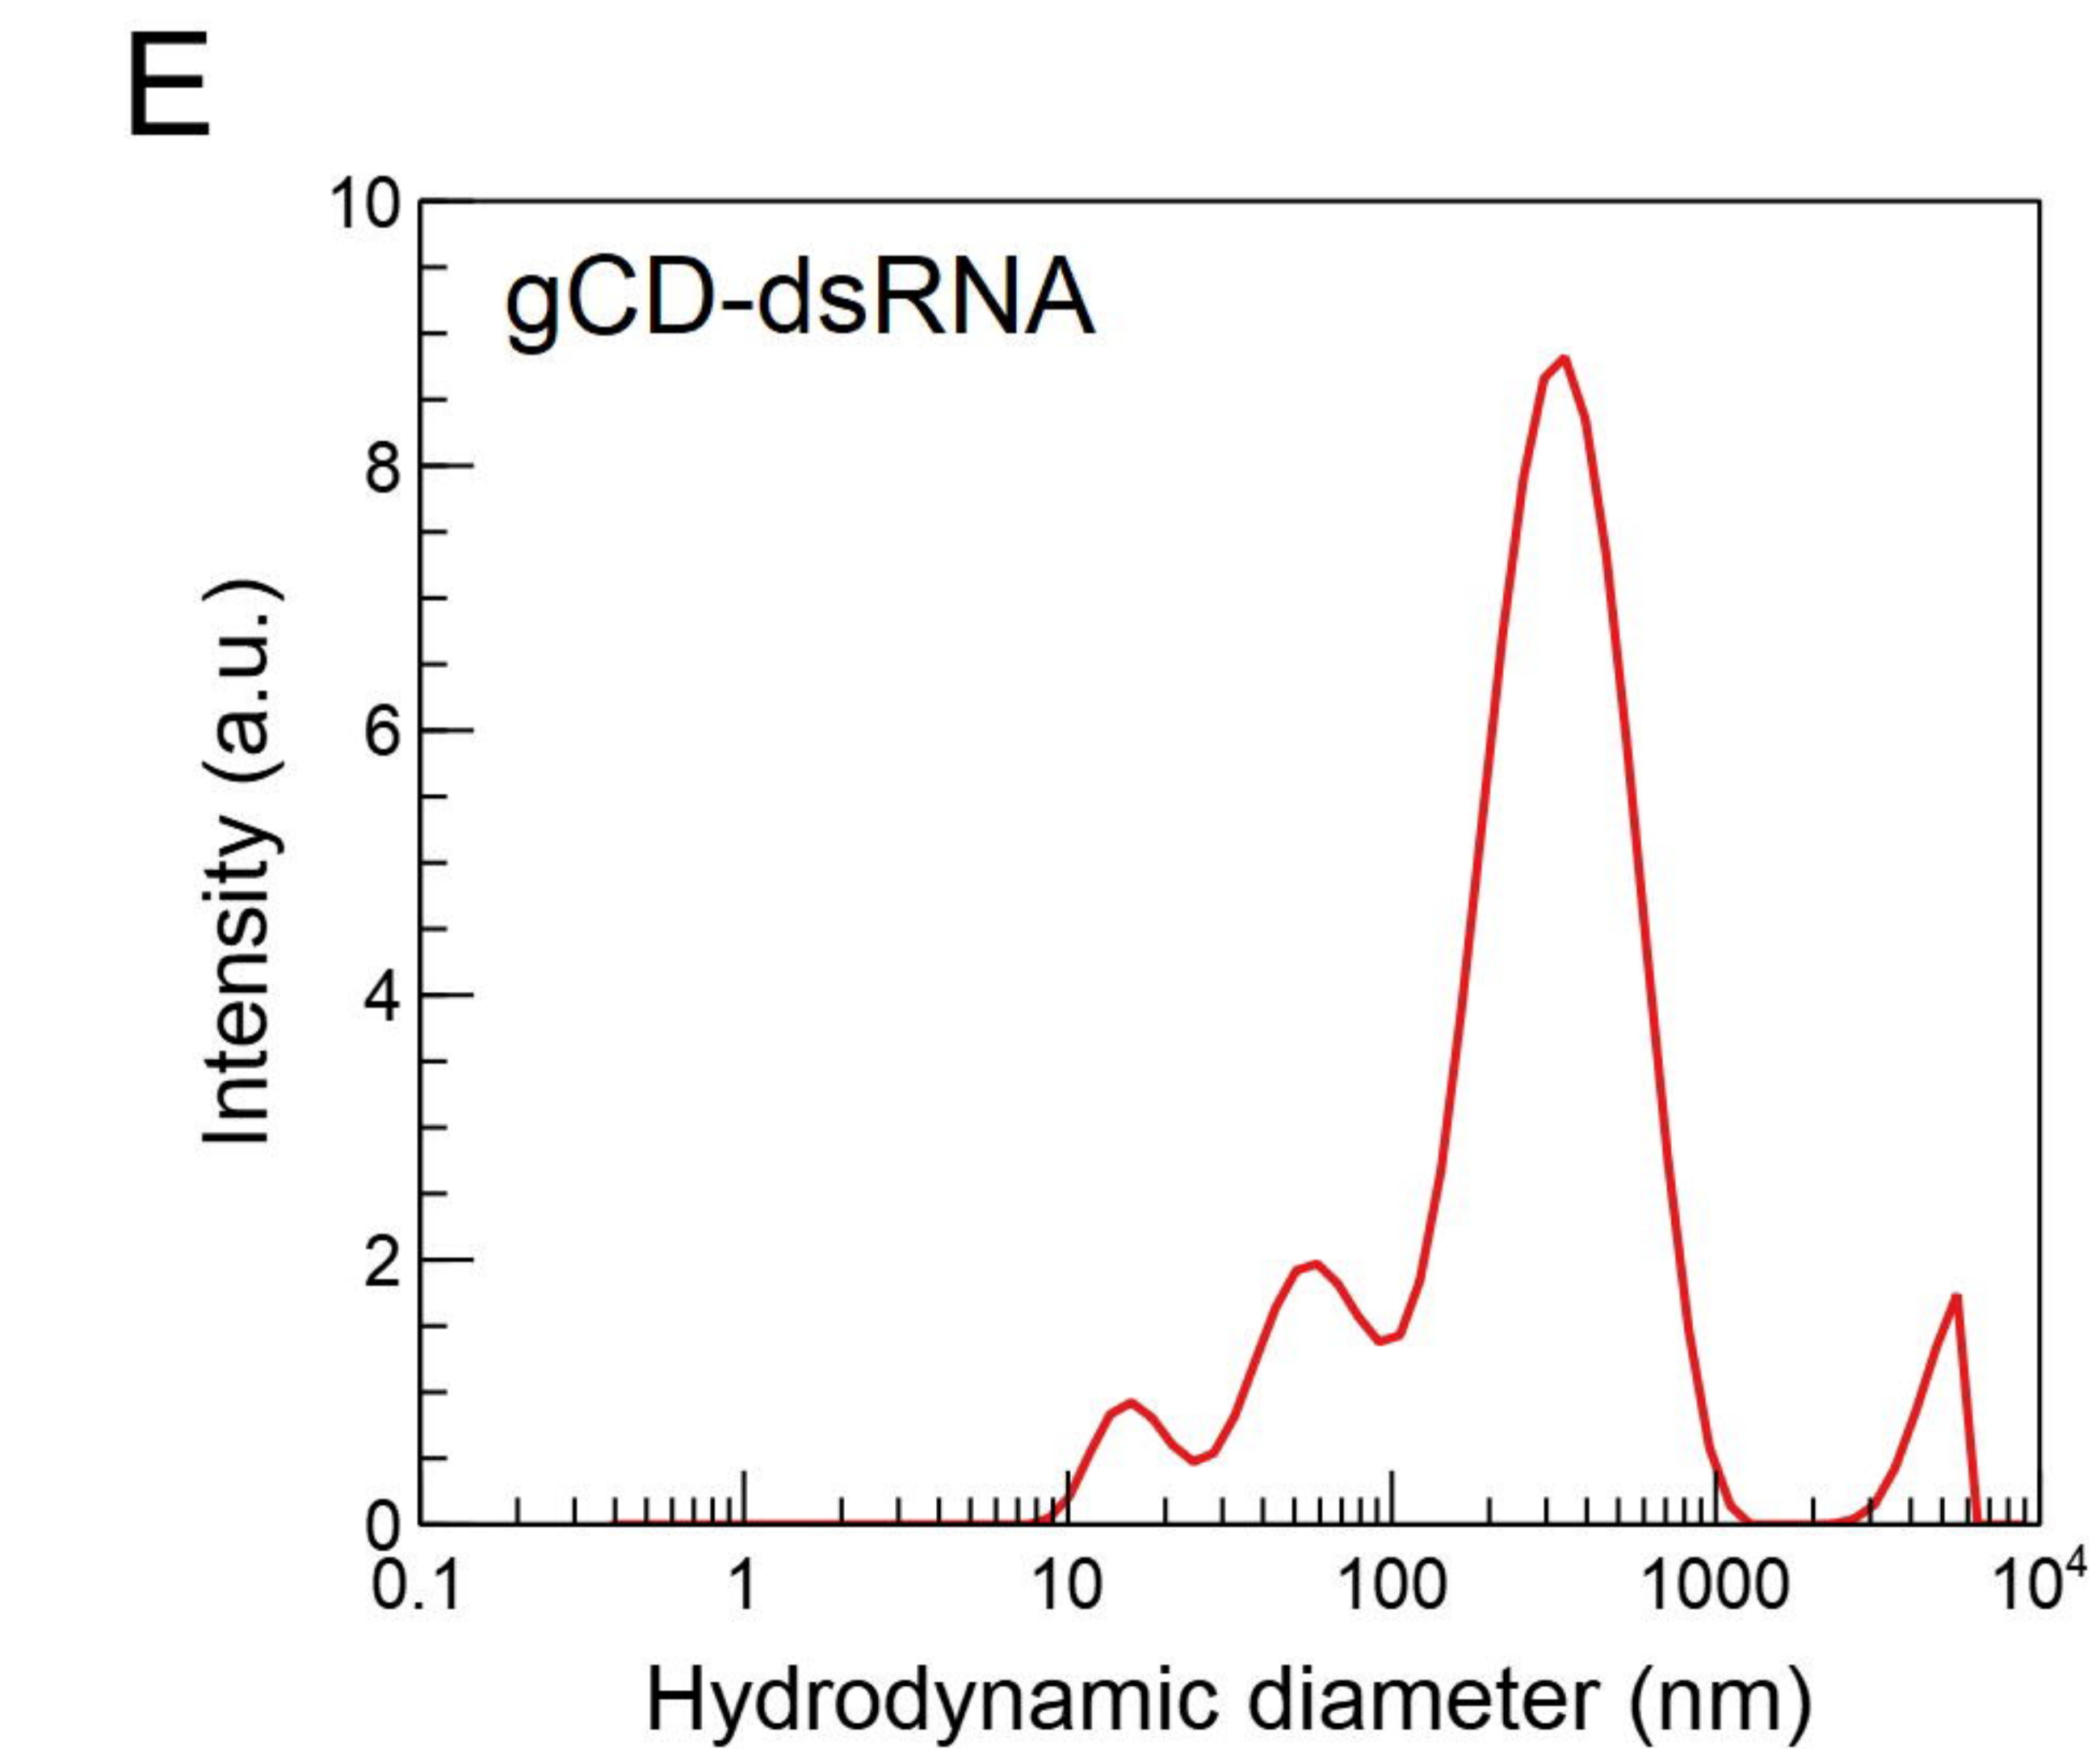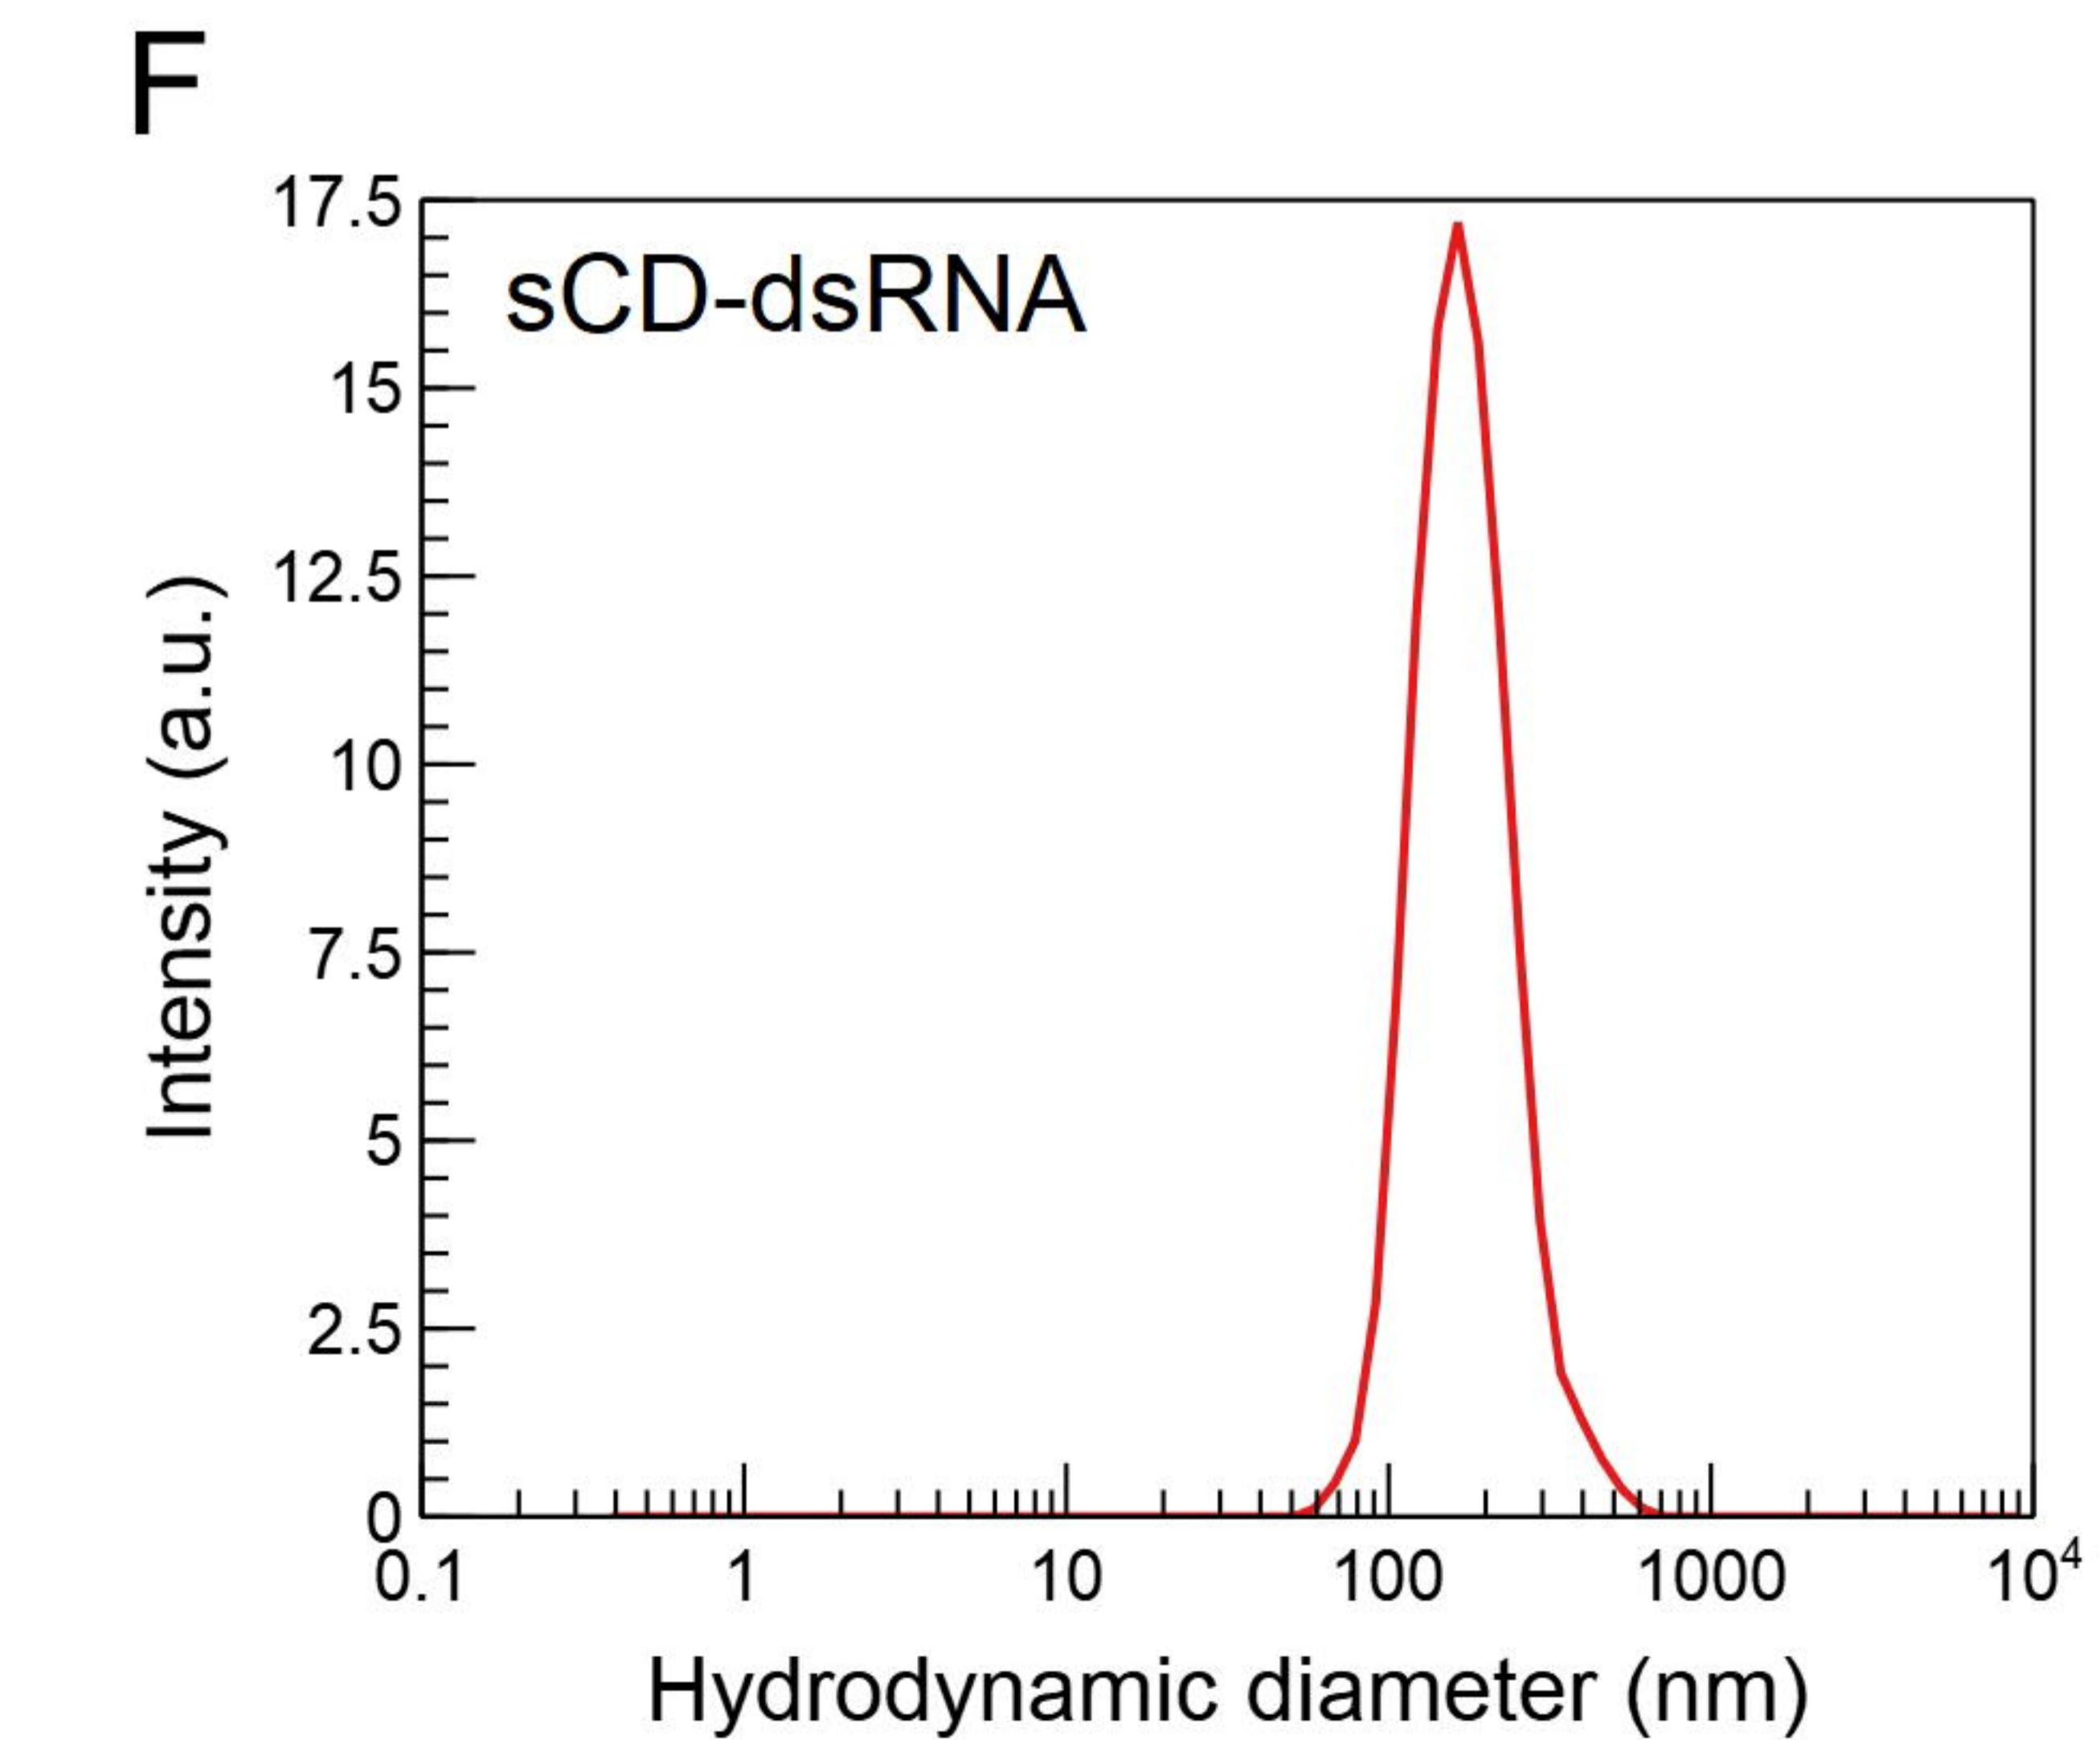



M 1 2 3 4 5 6 7

A

1000  
900  
800  
700  
600  
500  
400  
300  
200

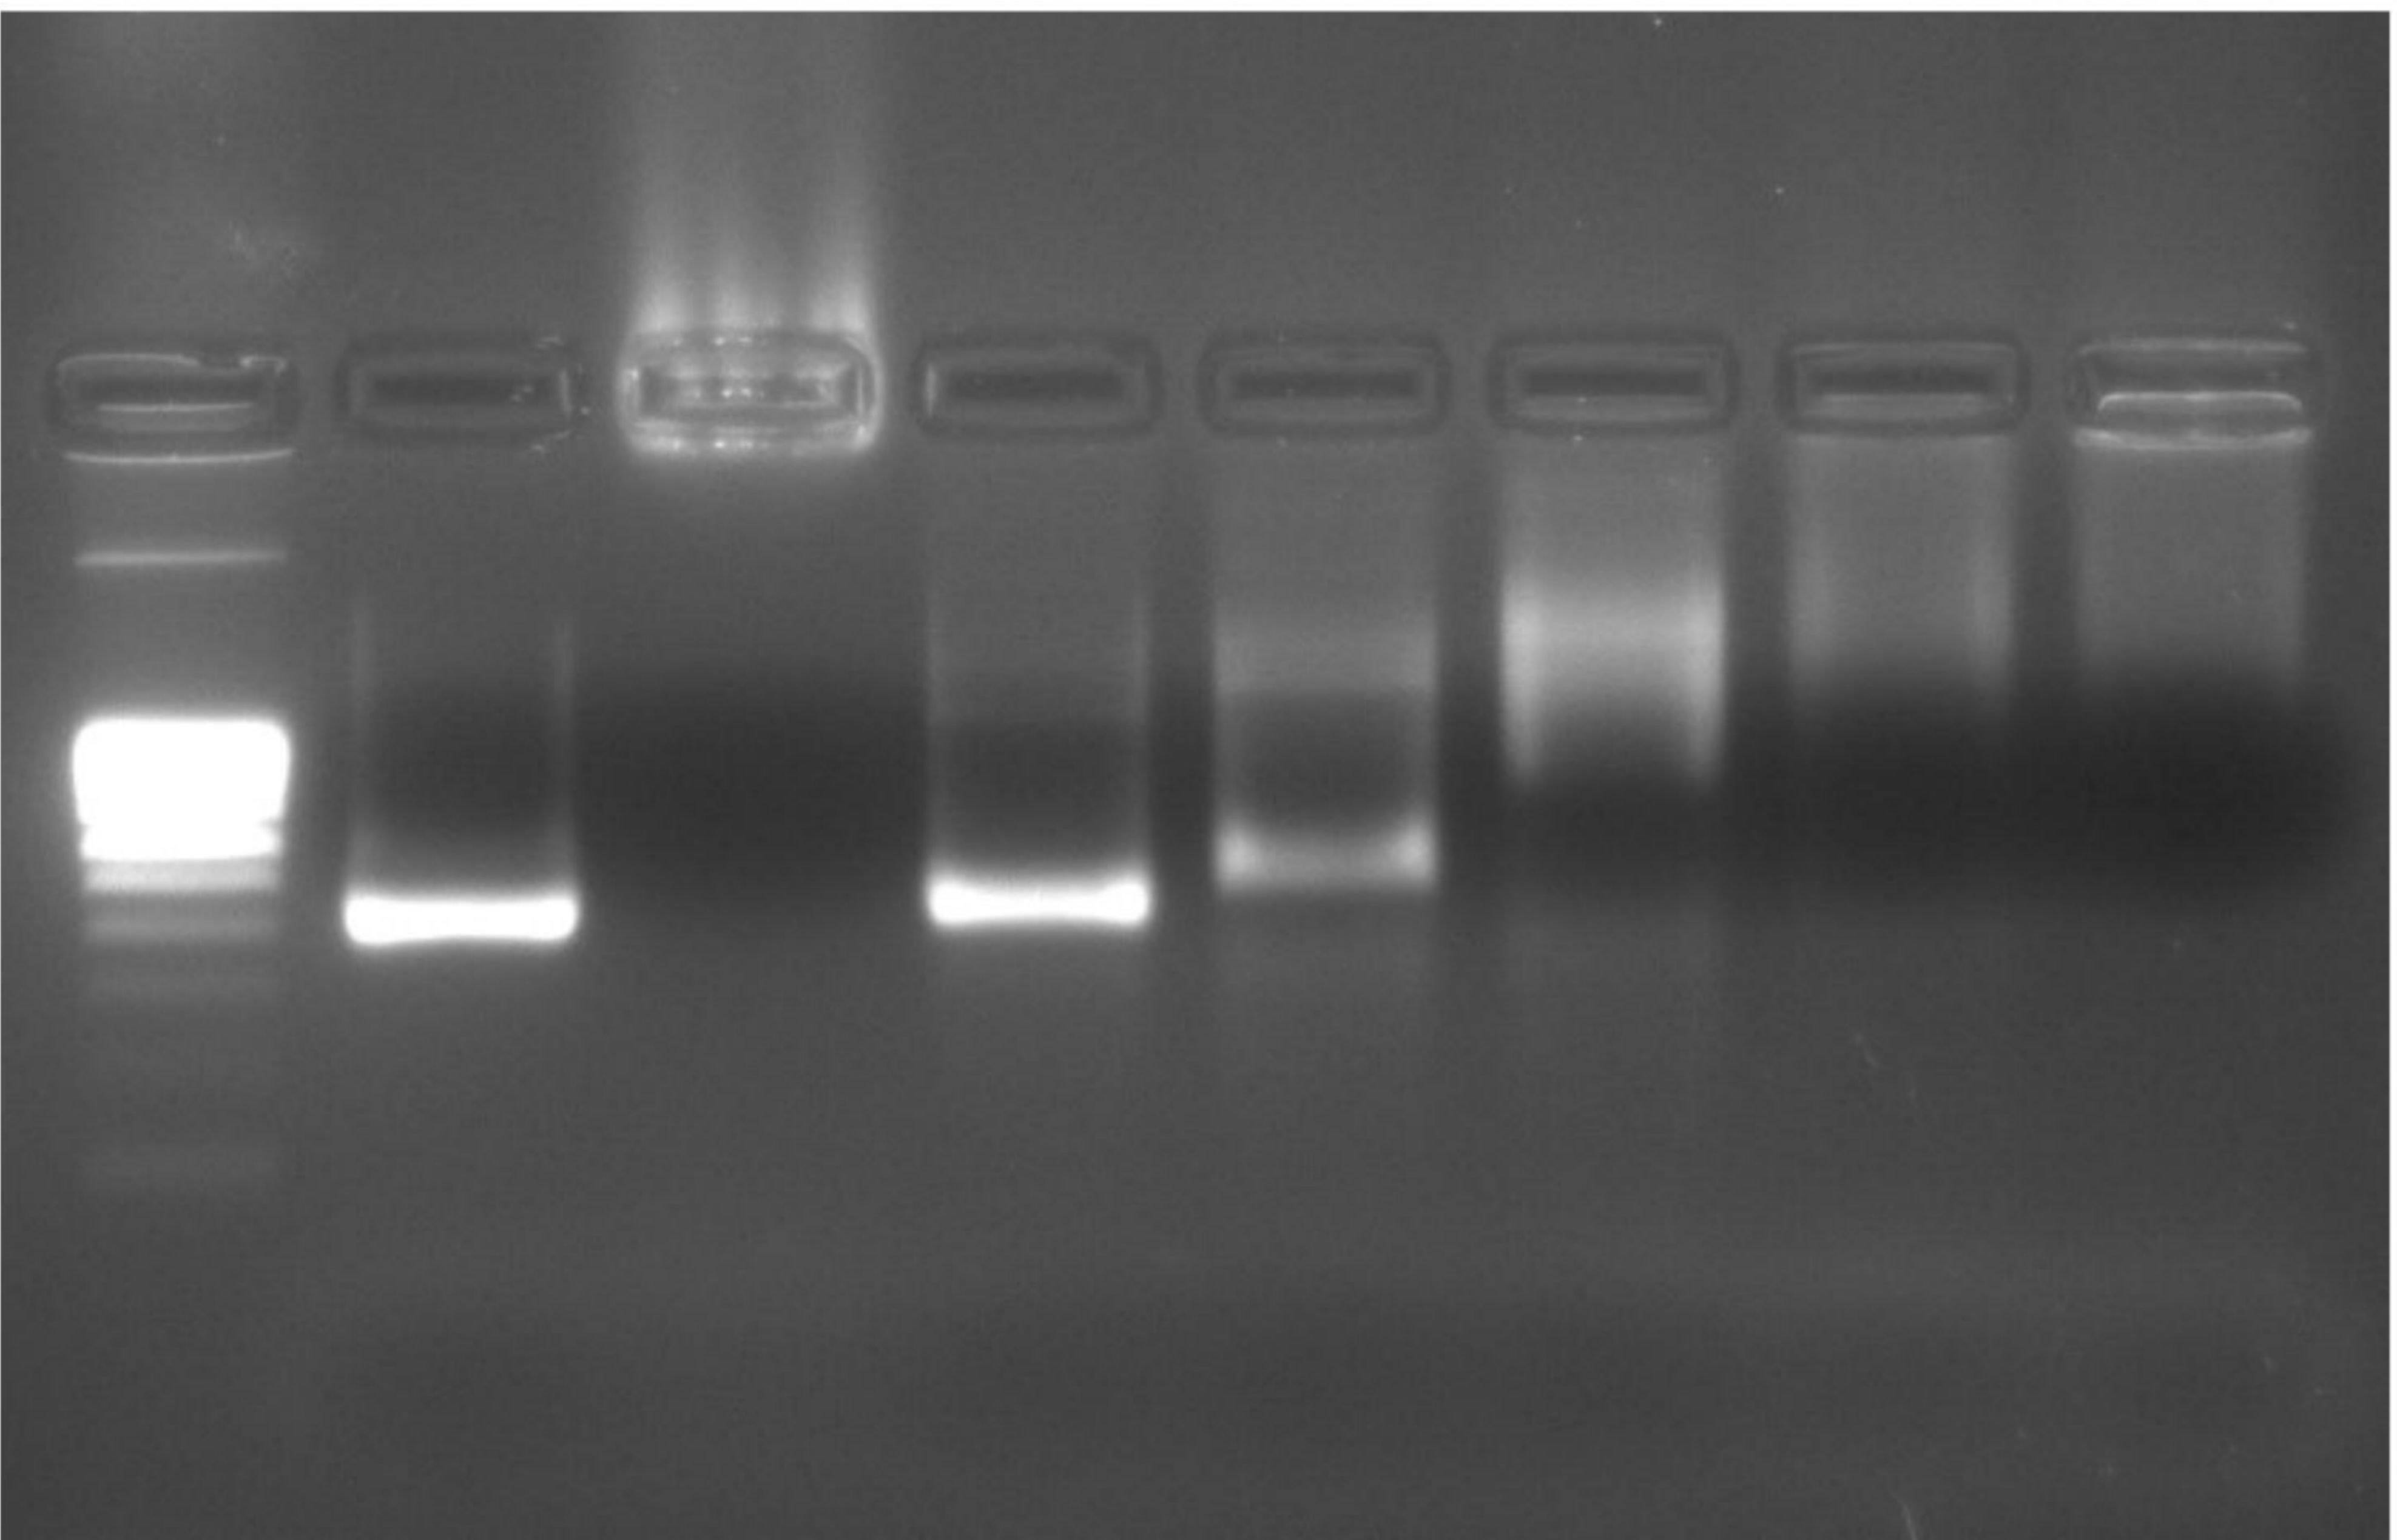

B

1000  
900  
800  
700  
600  
500

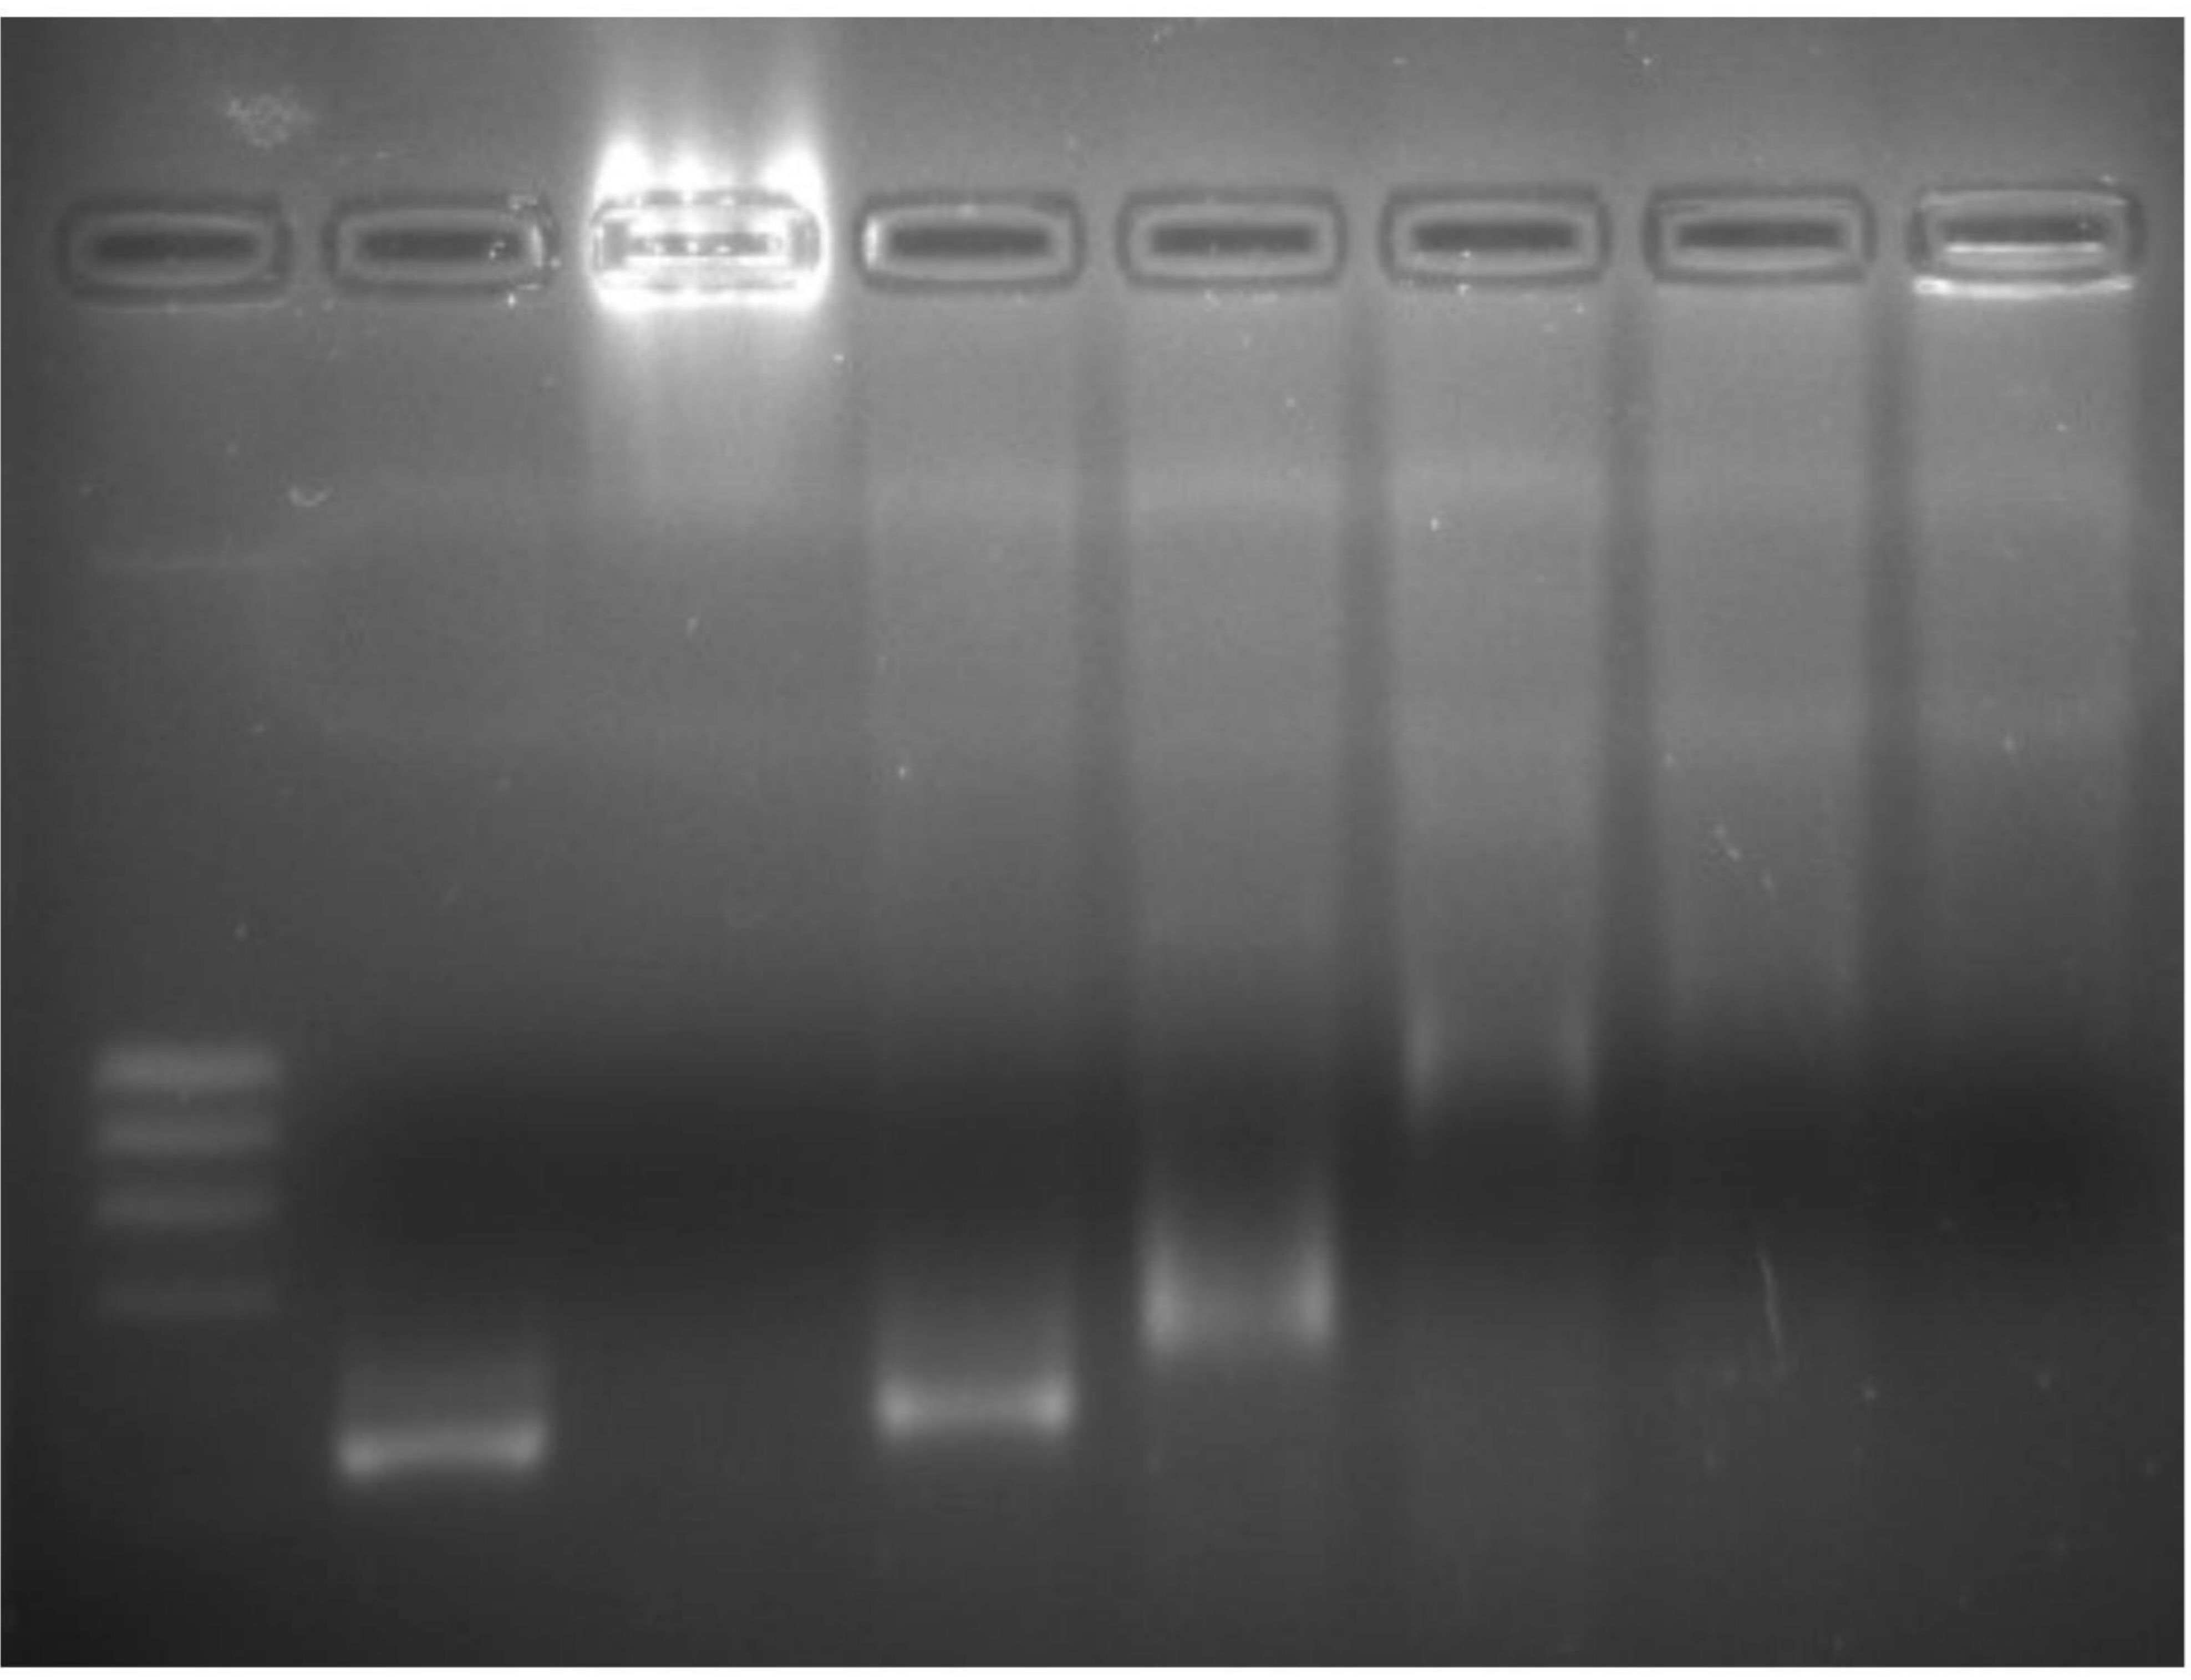

M 1 2 3 4 5 6

C

1000  
900  
800  
700  
600  
500  
400  
300  
200

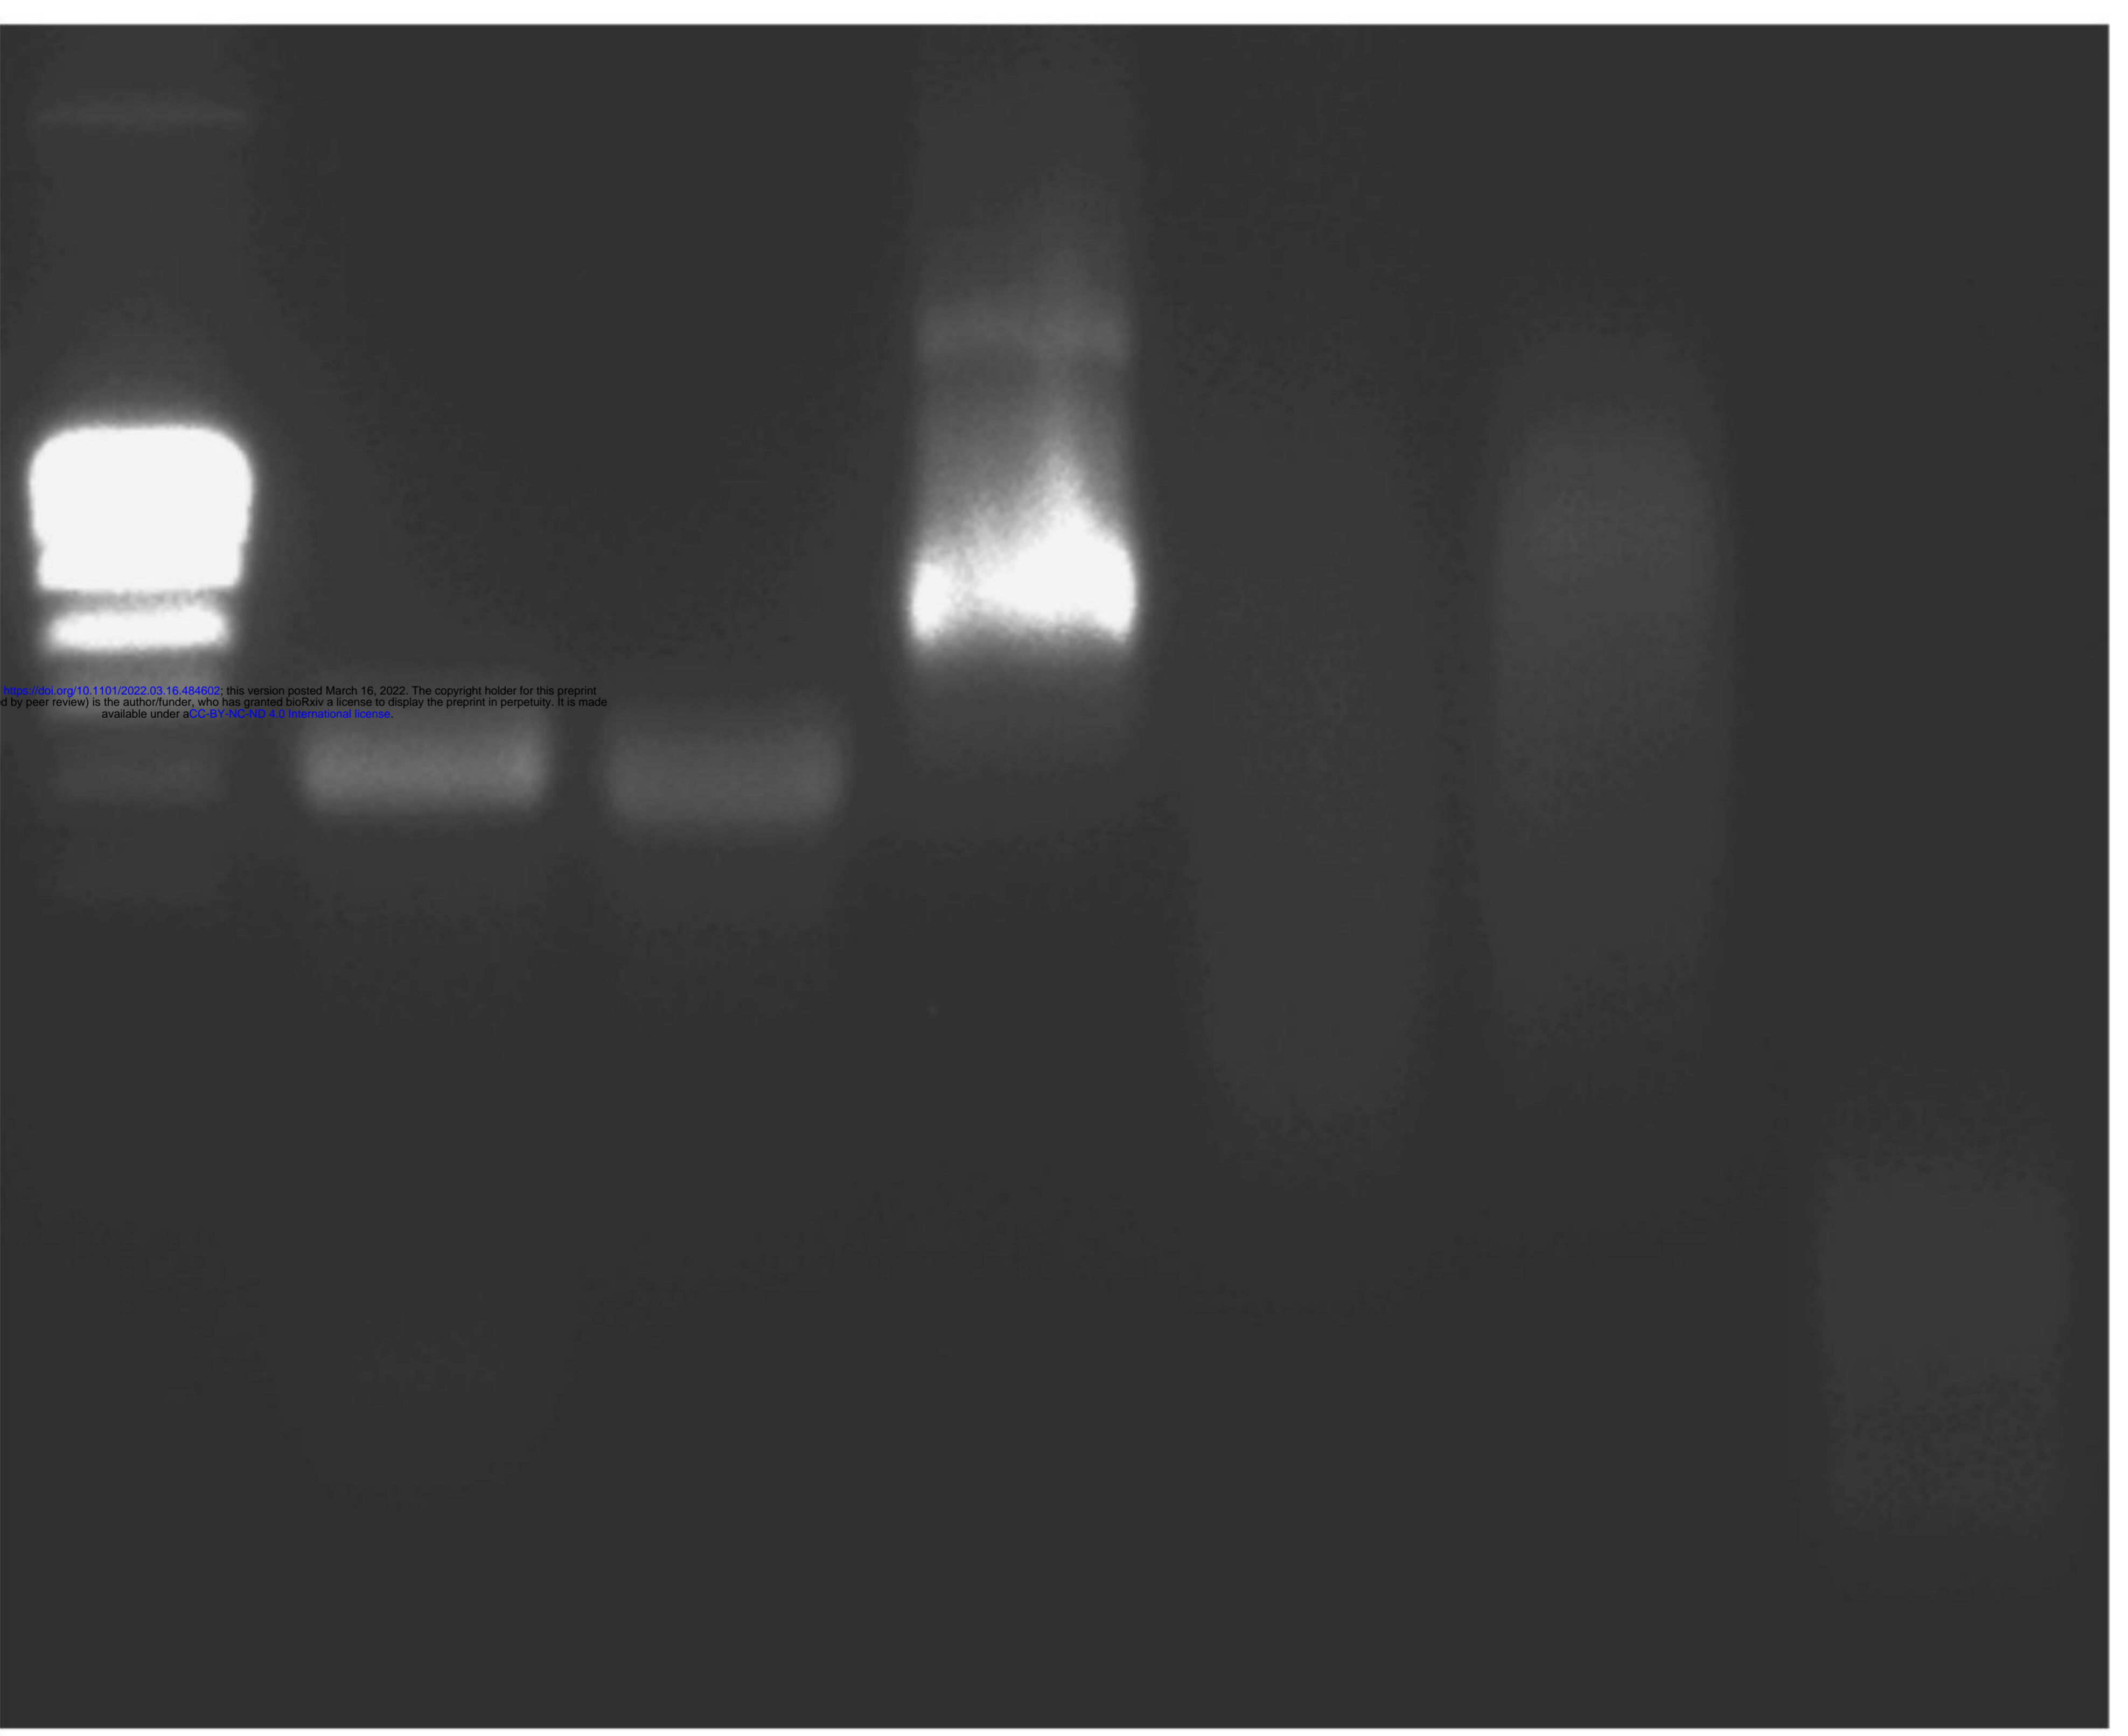



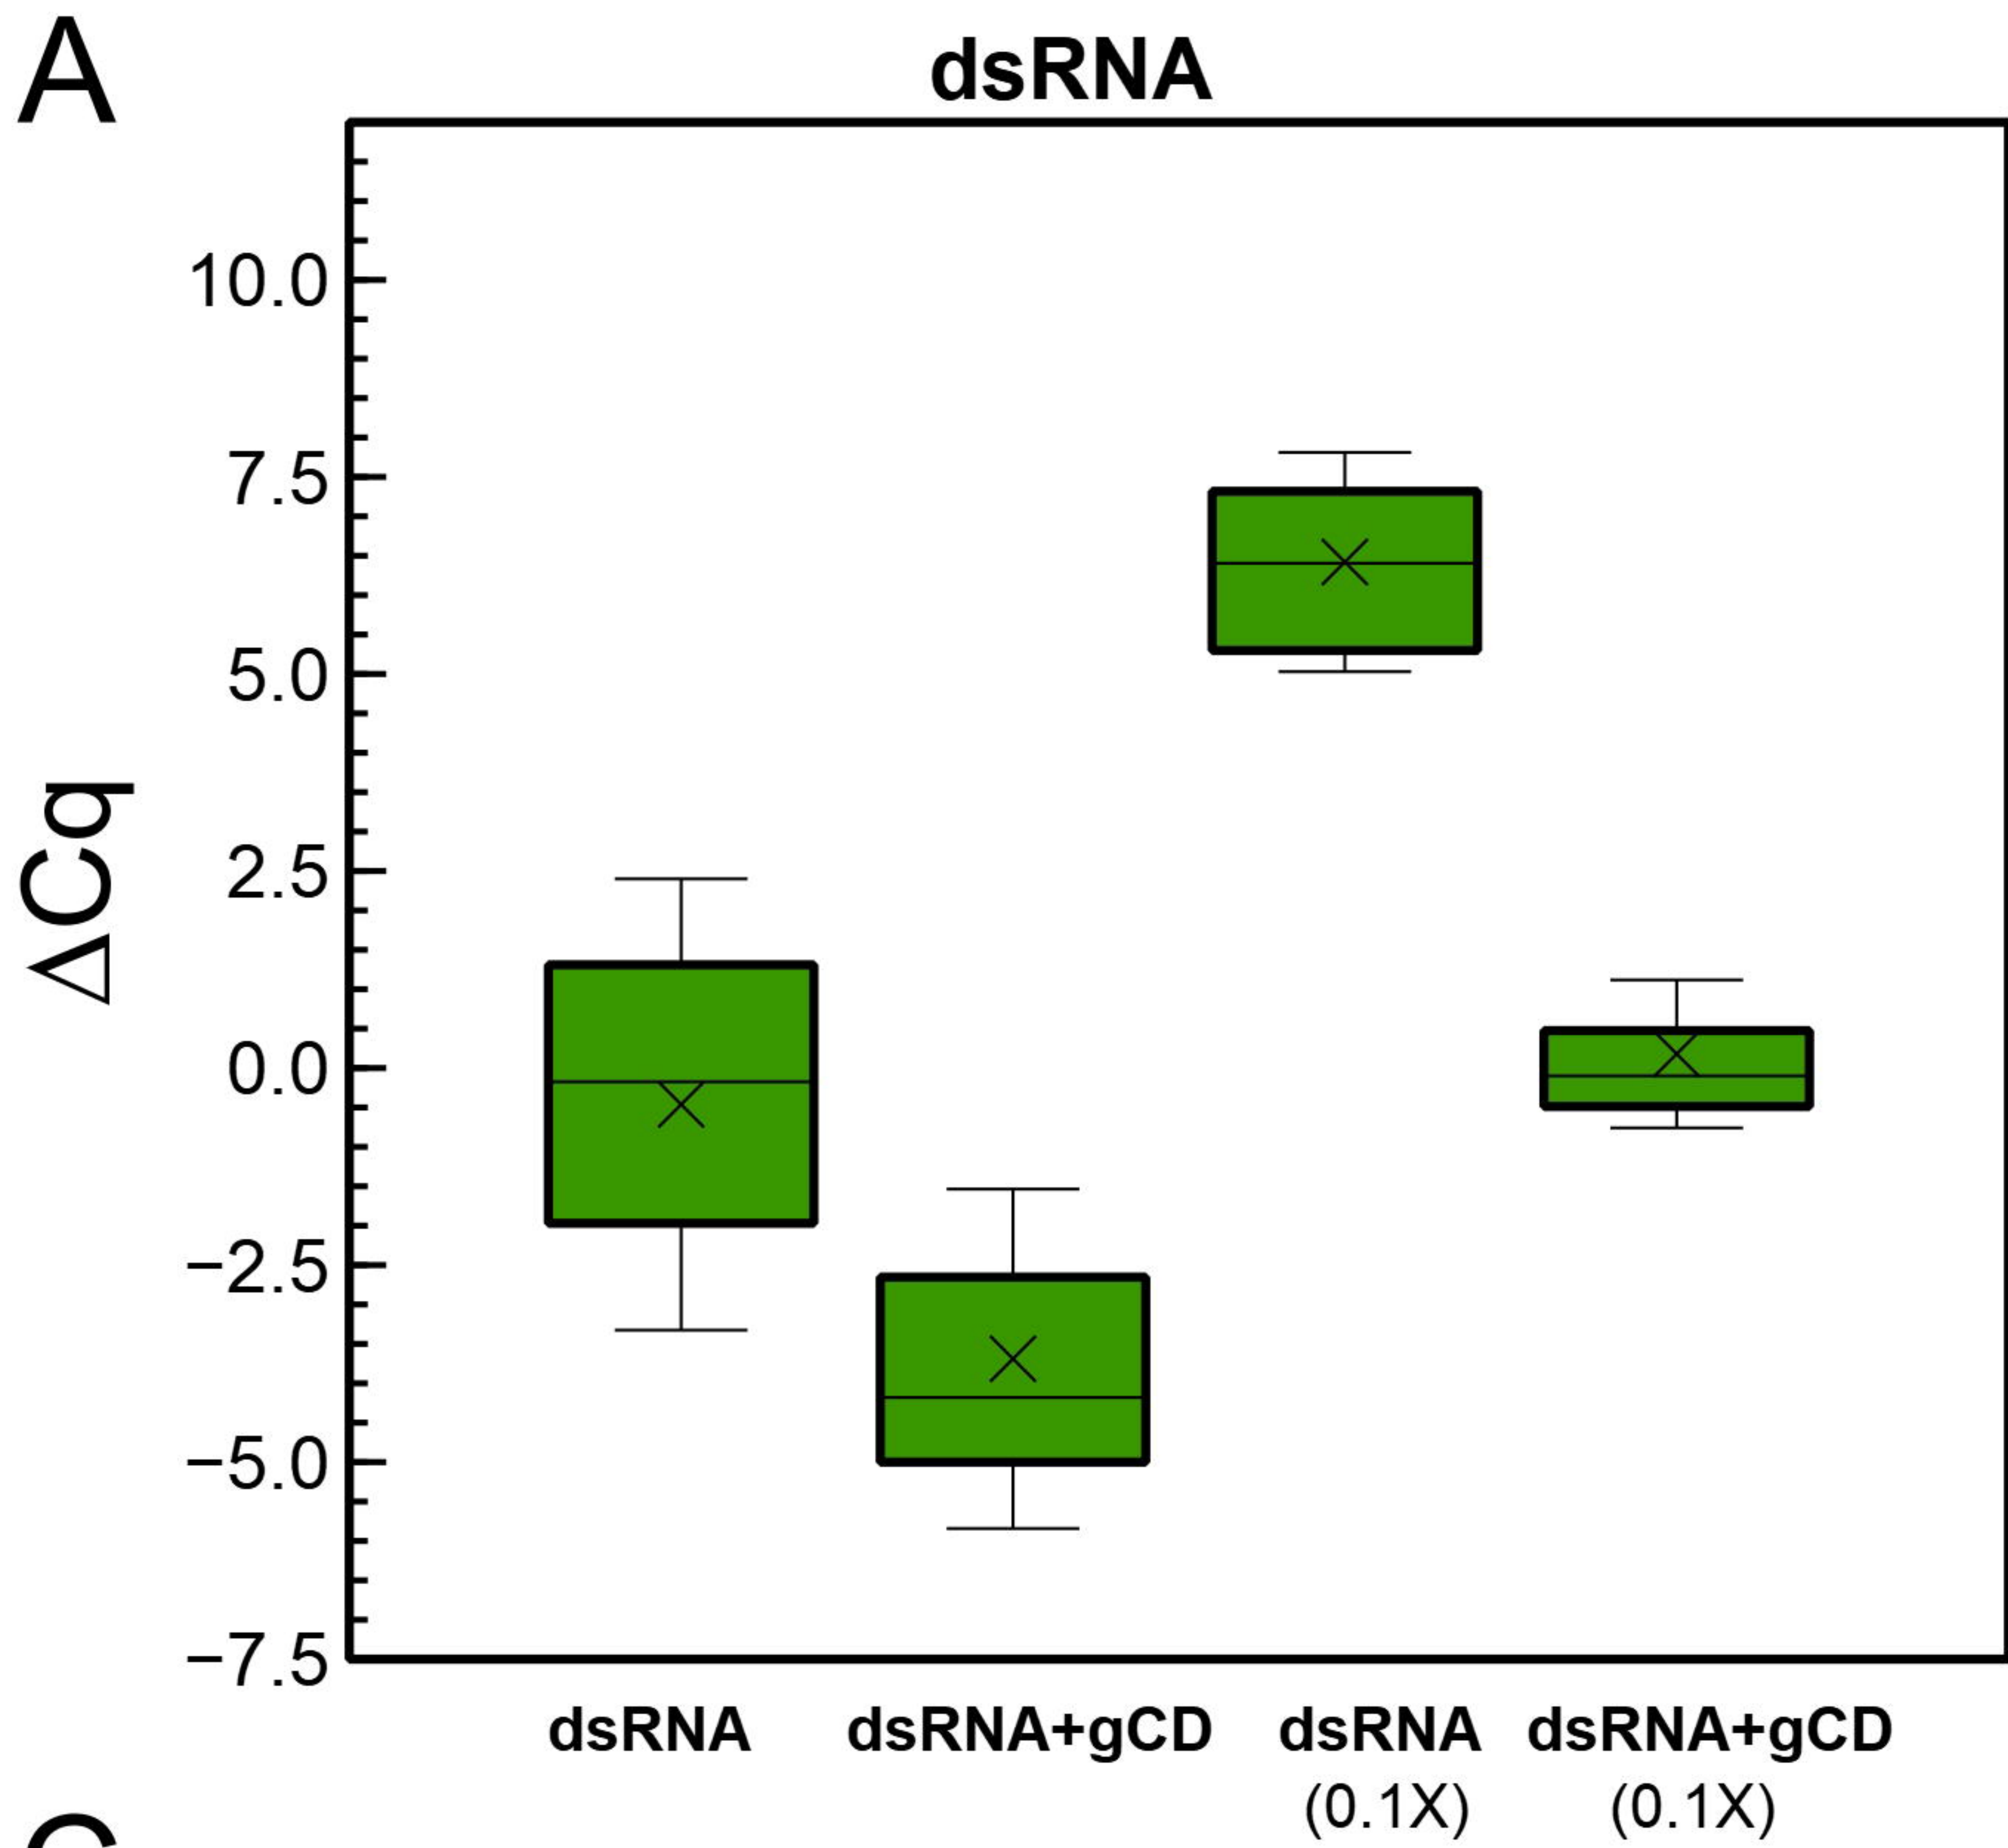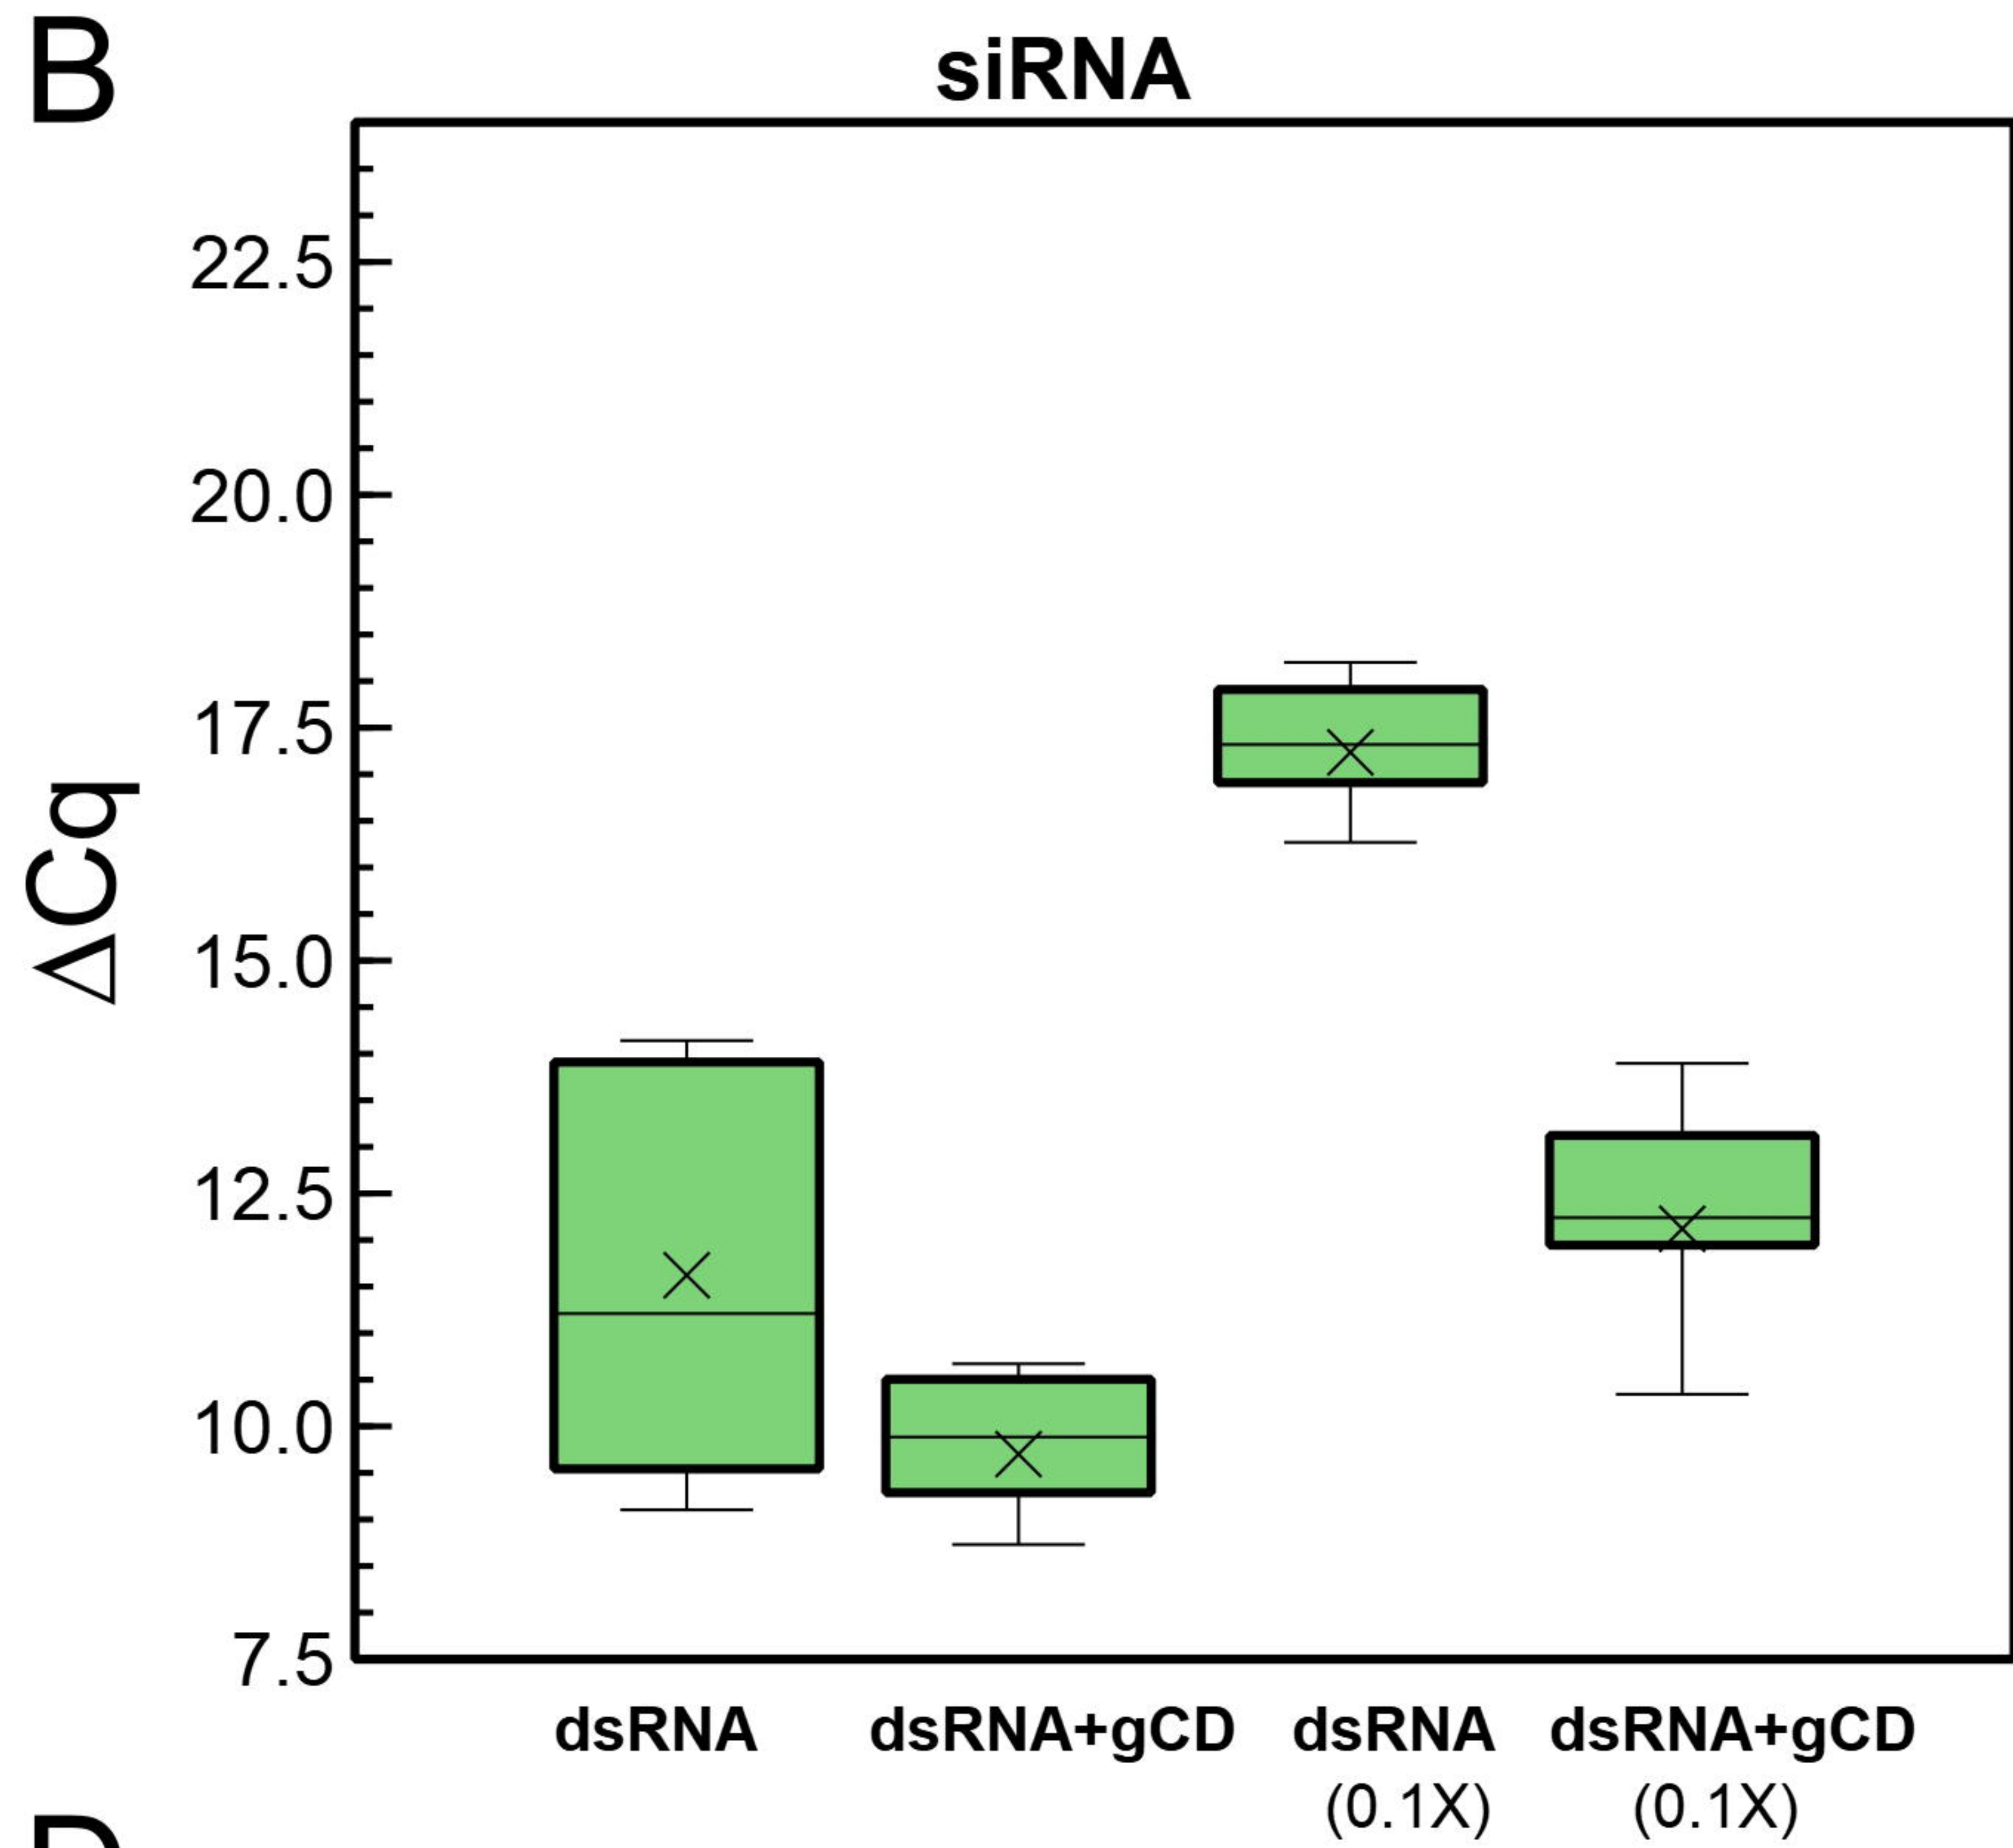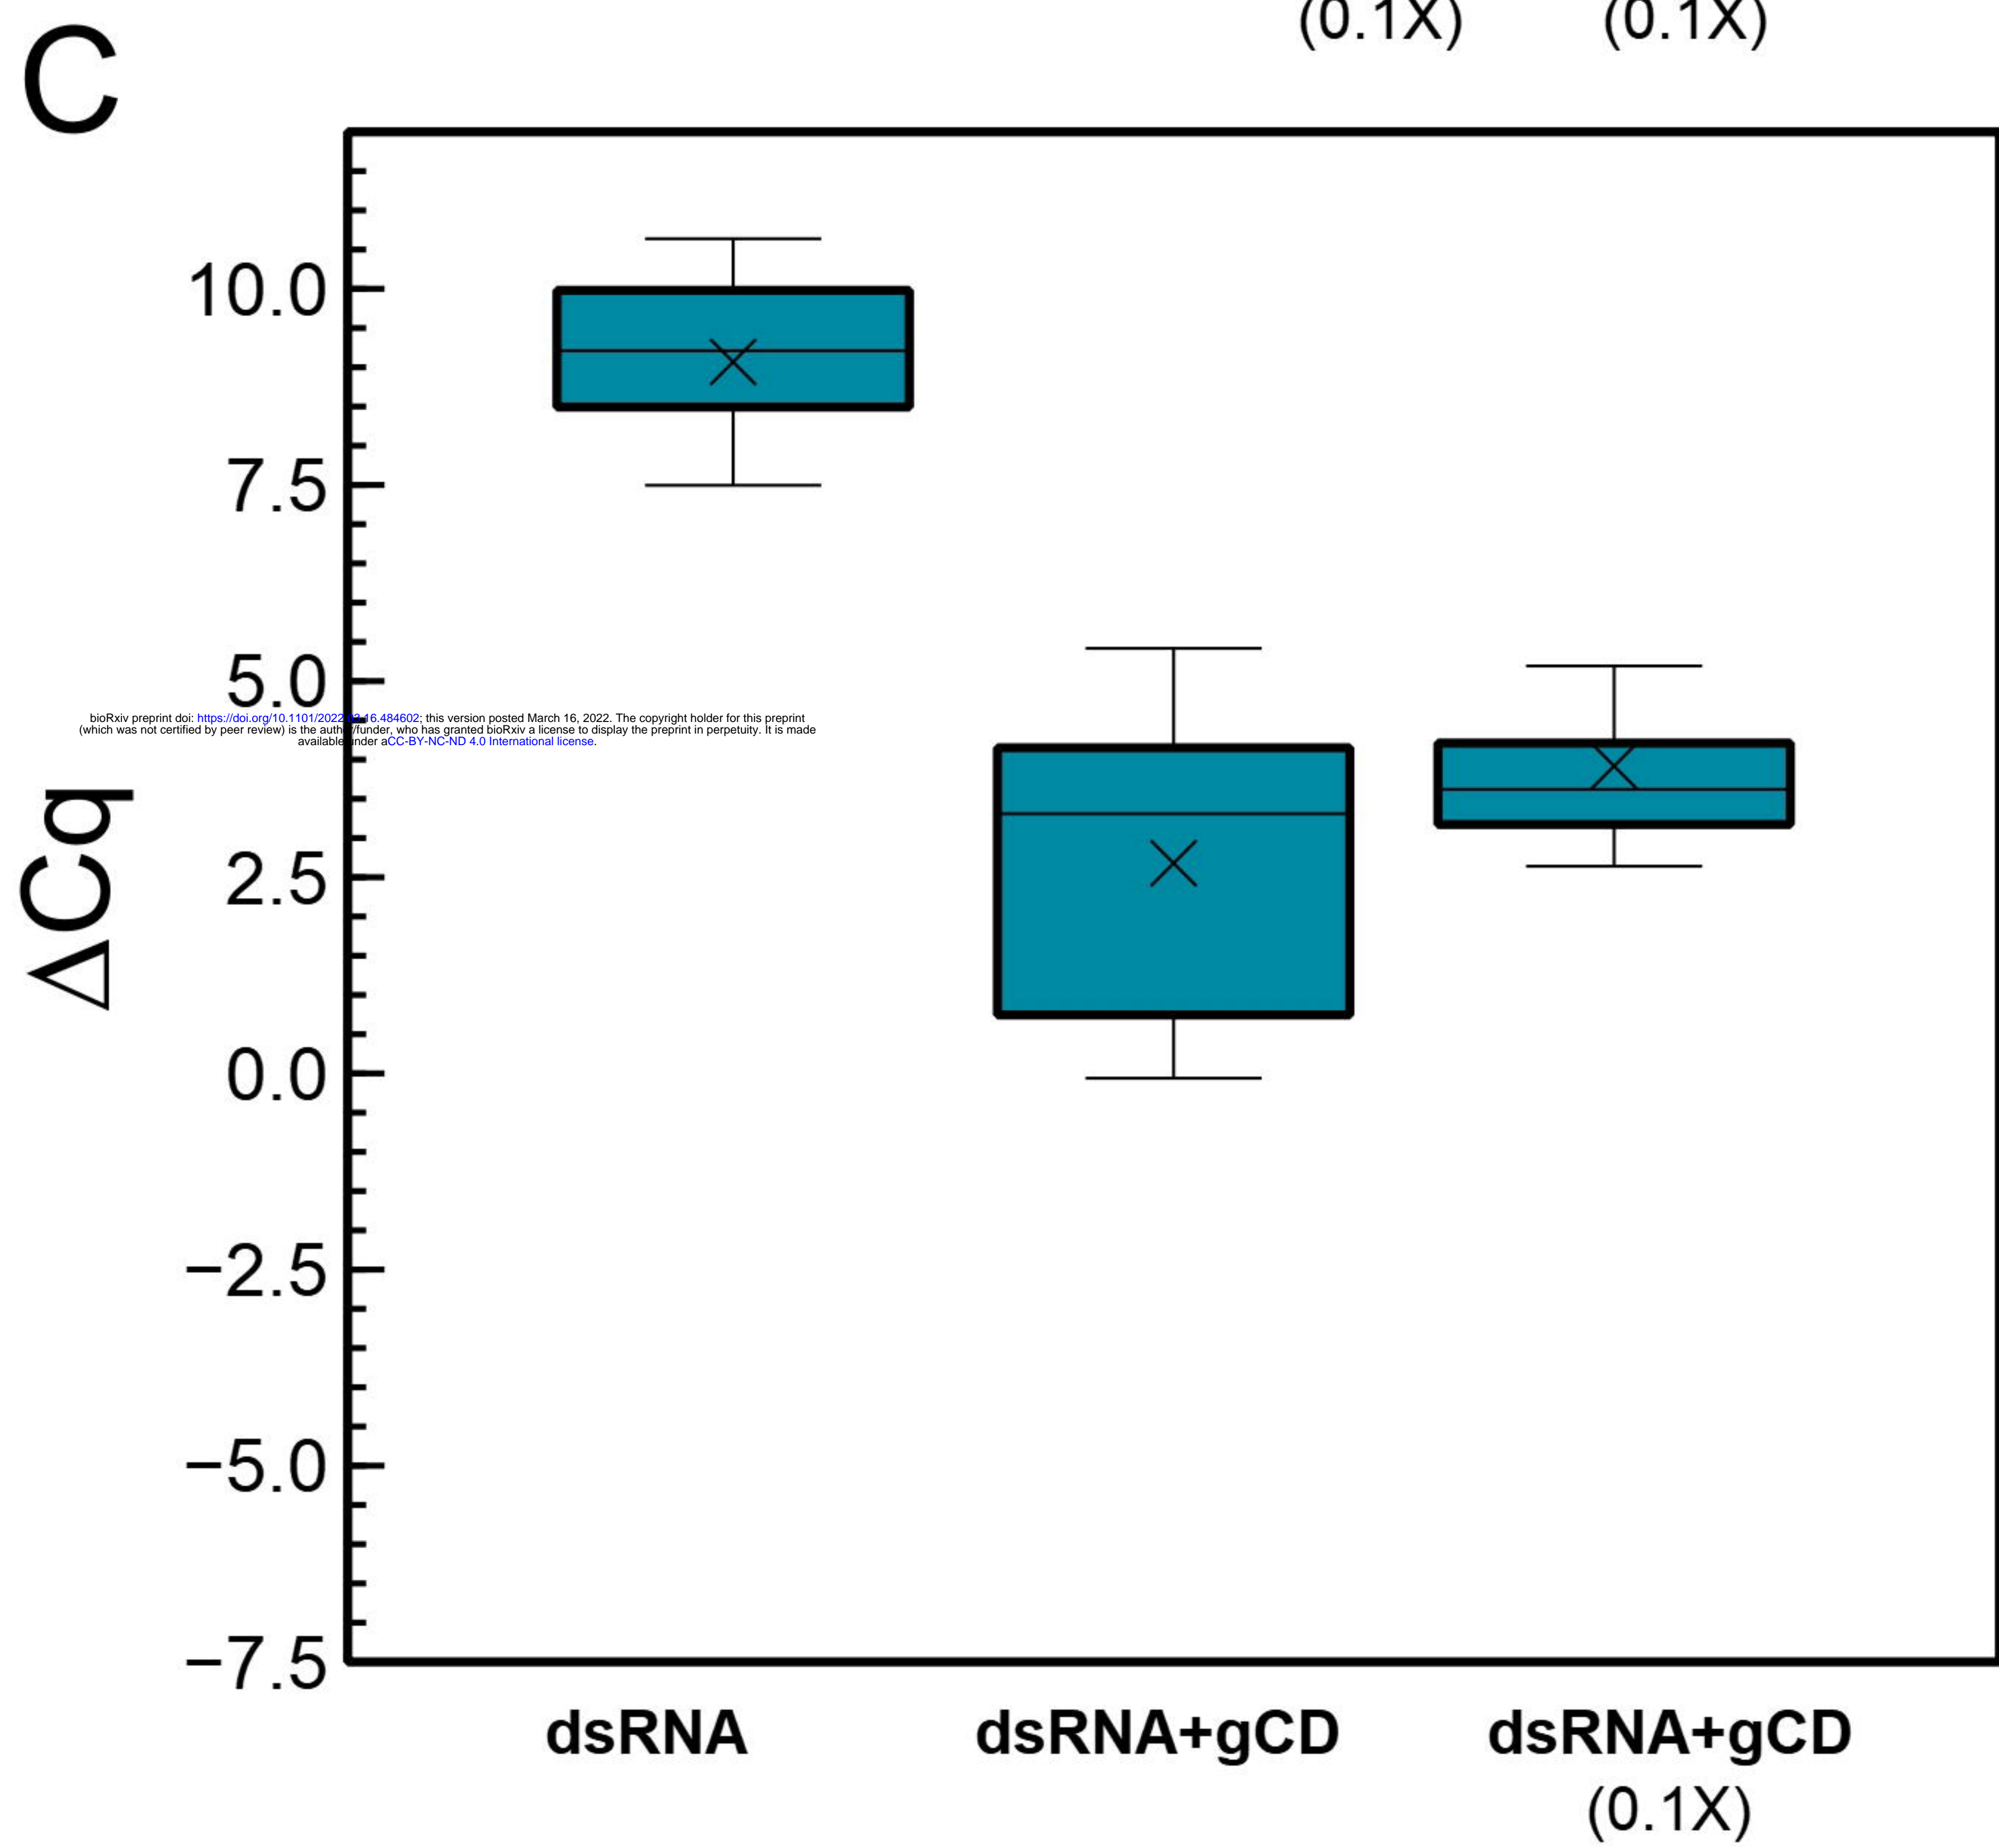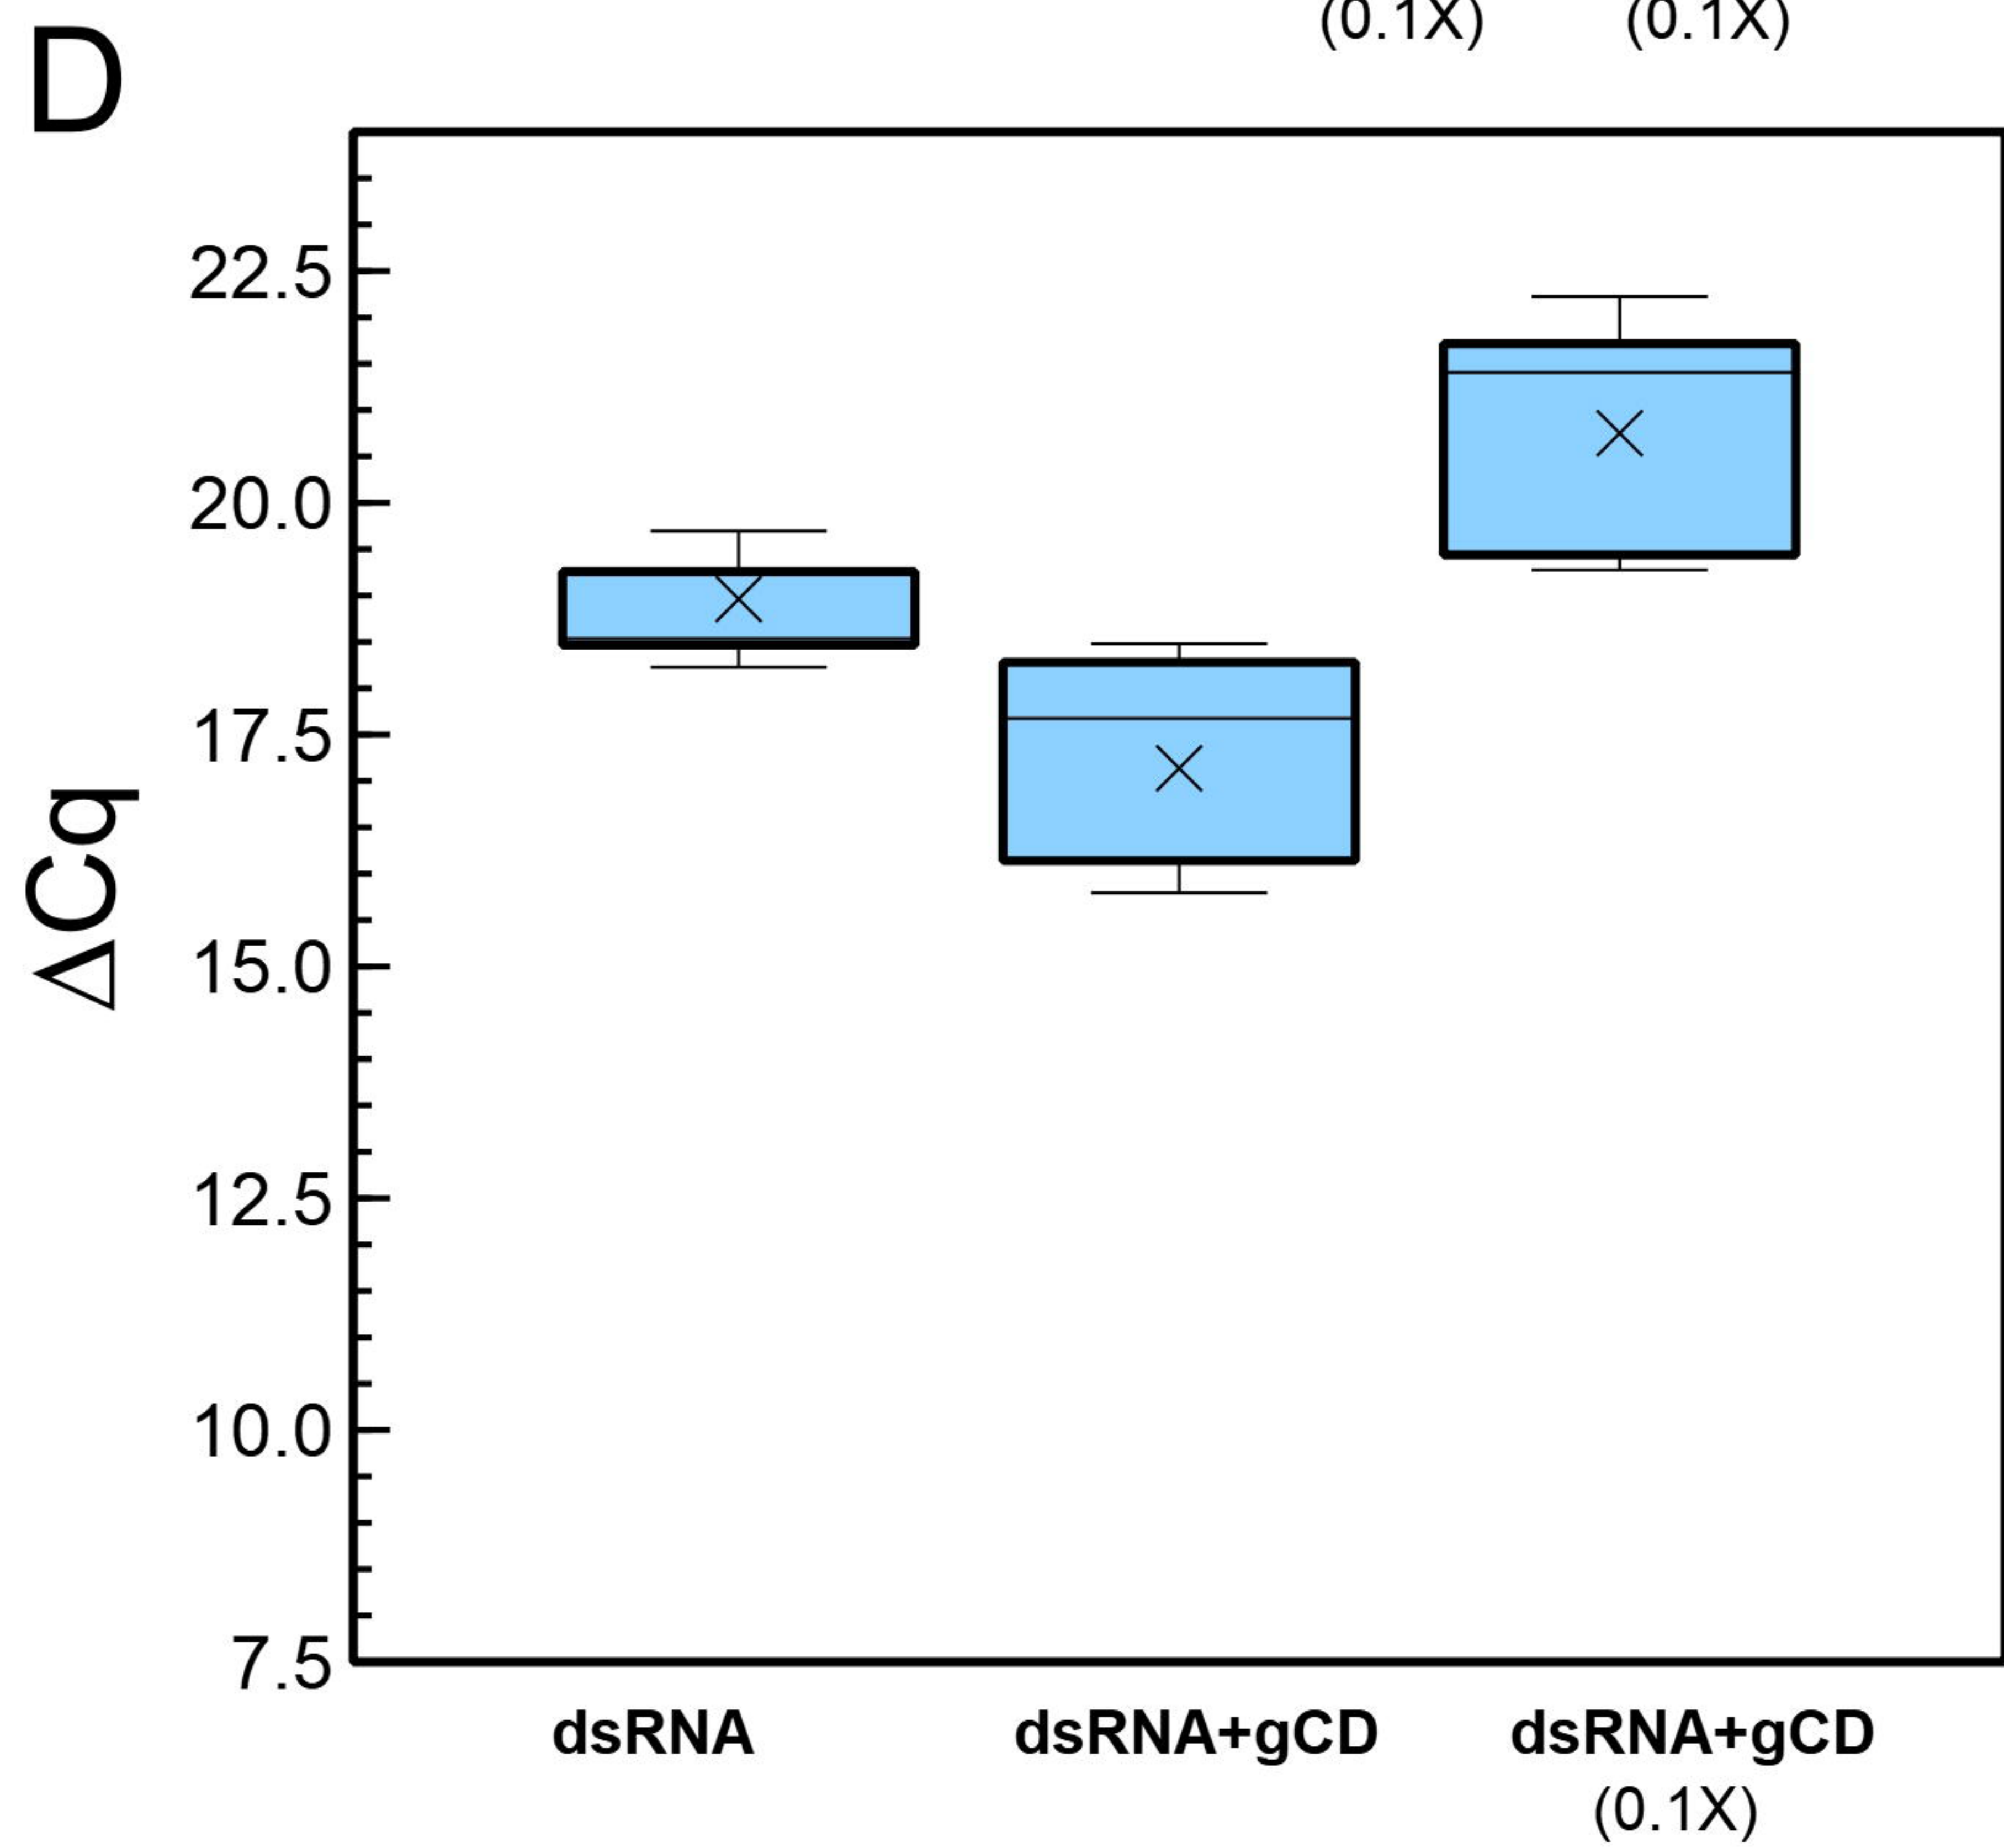



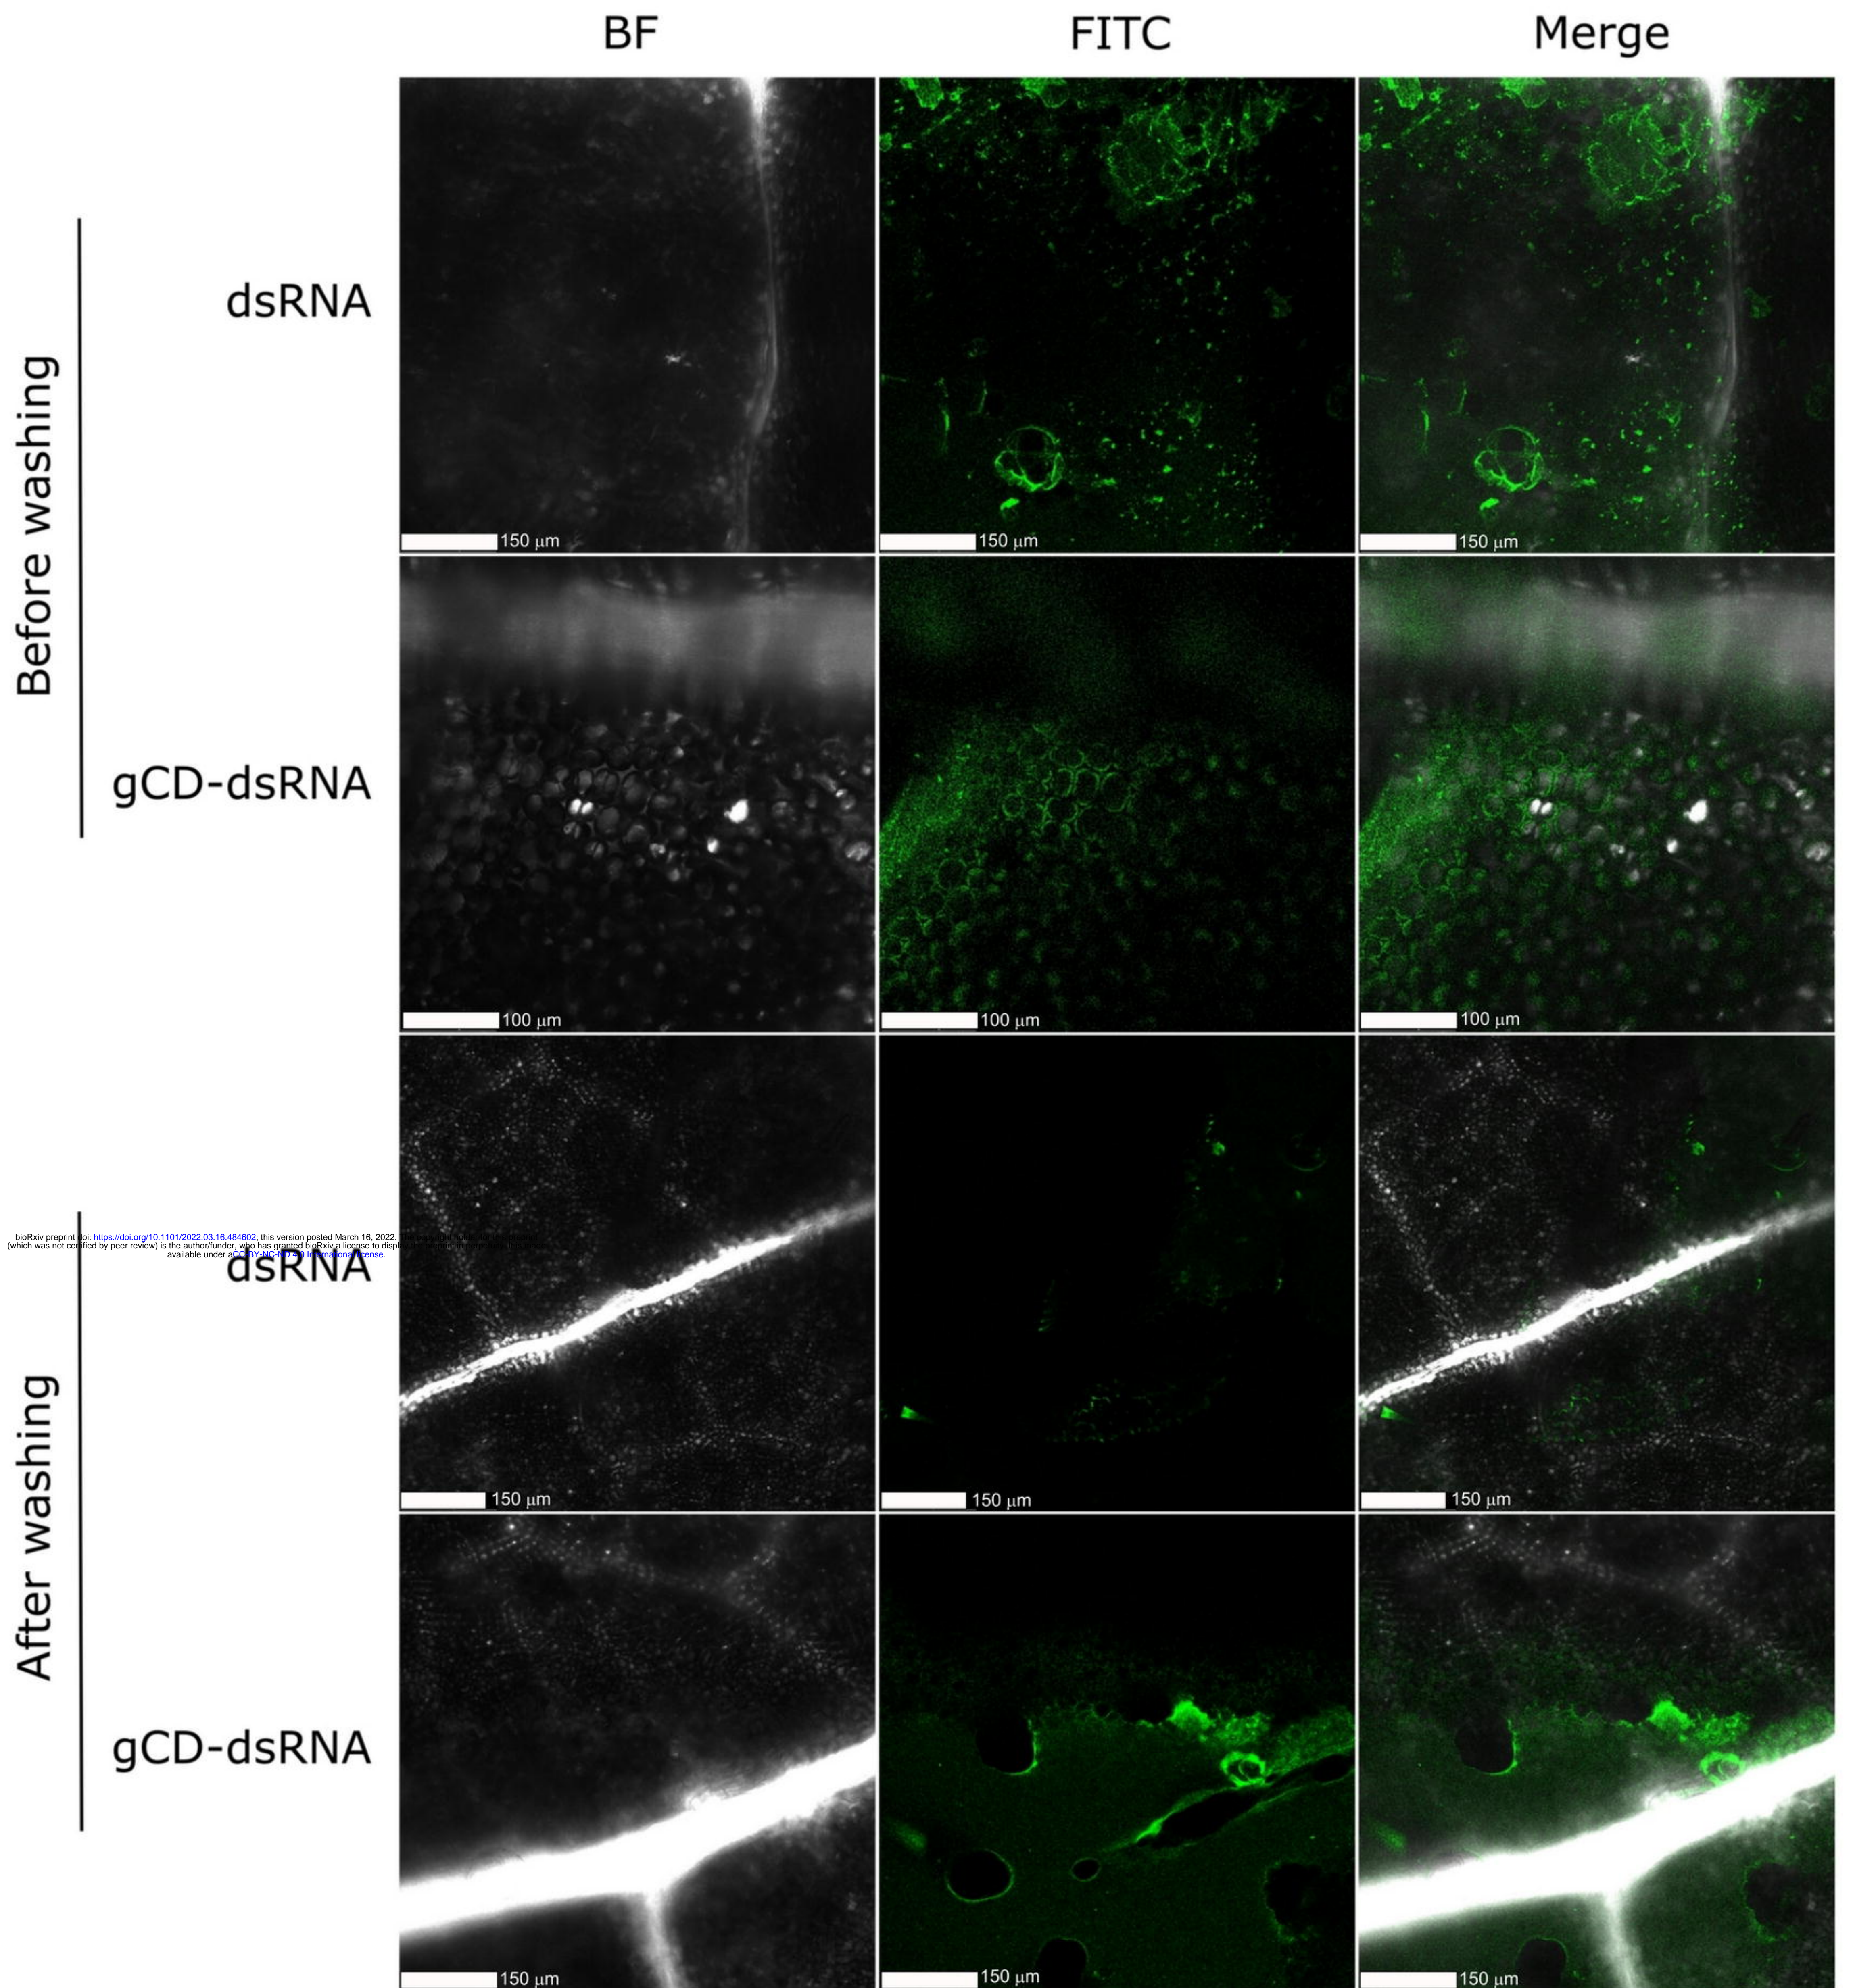



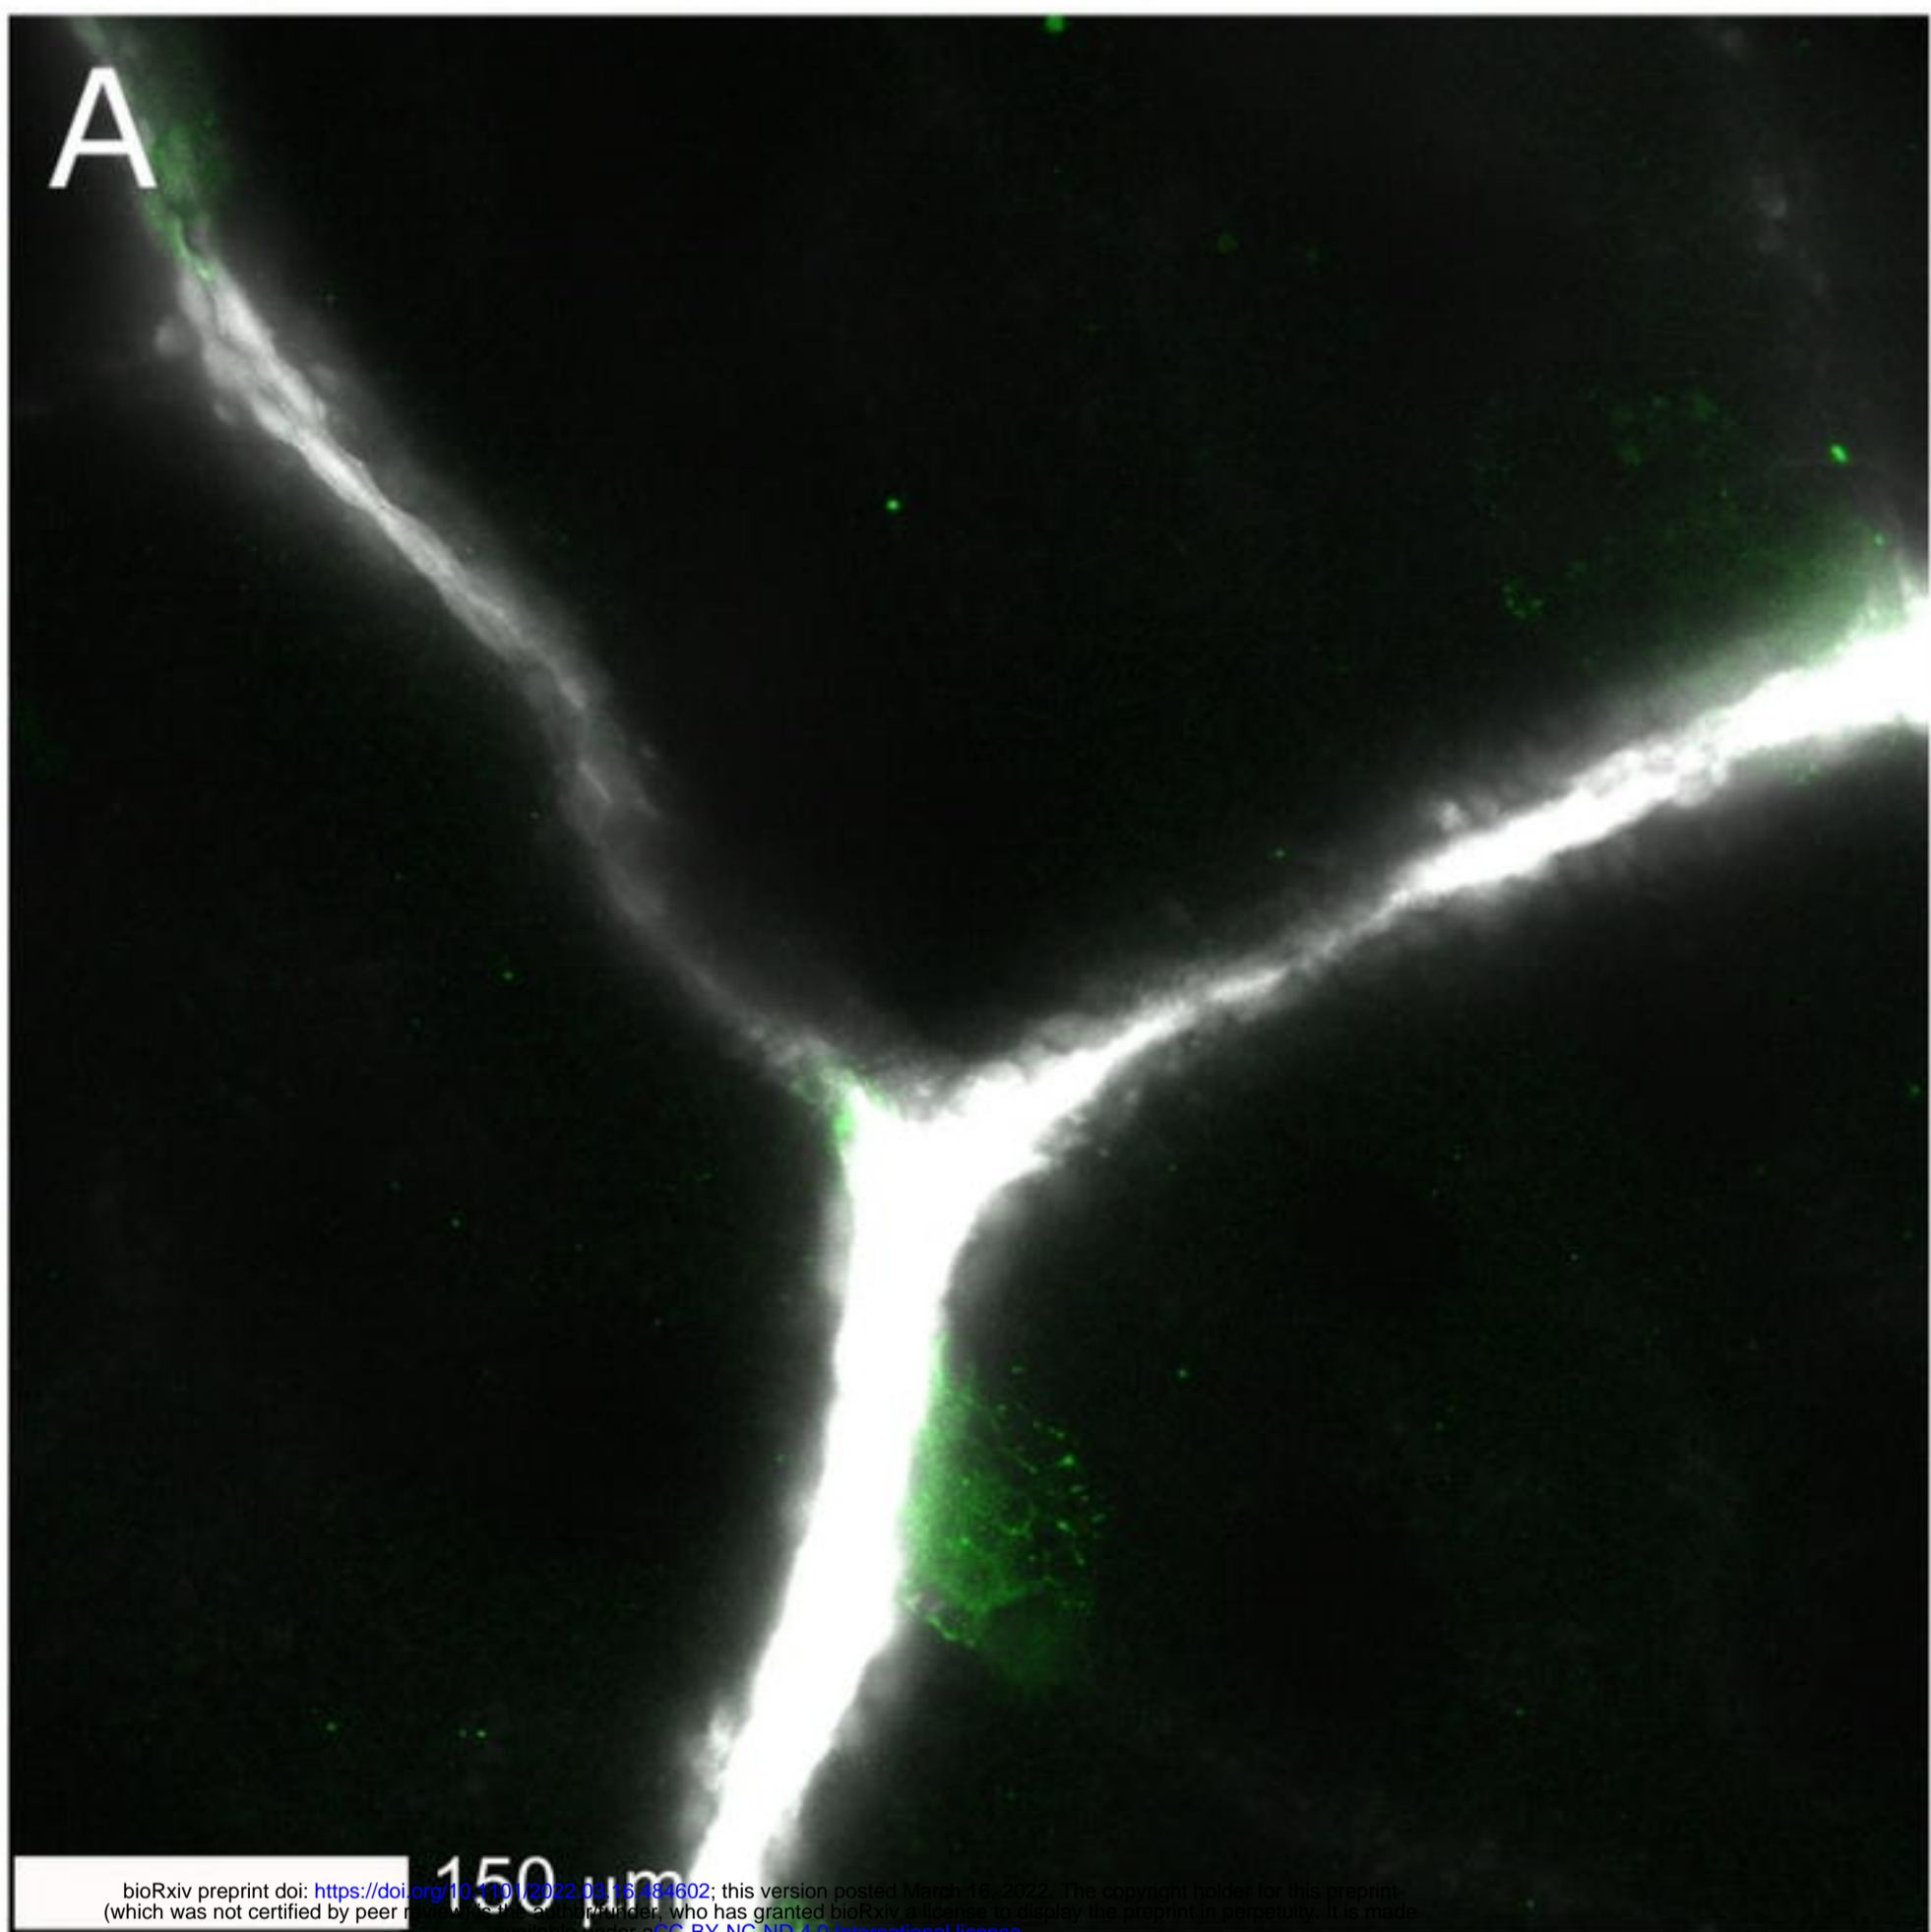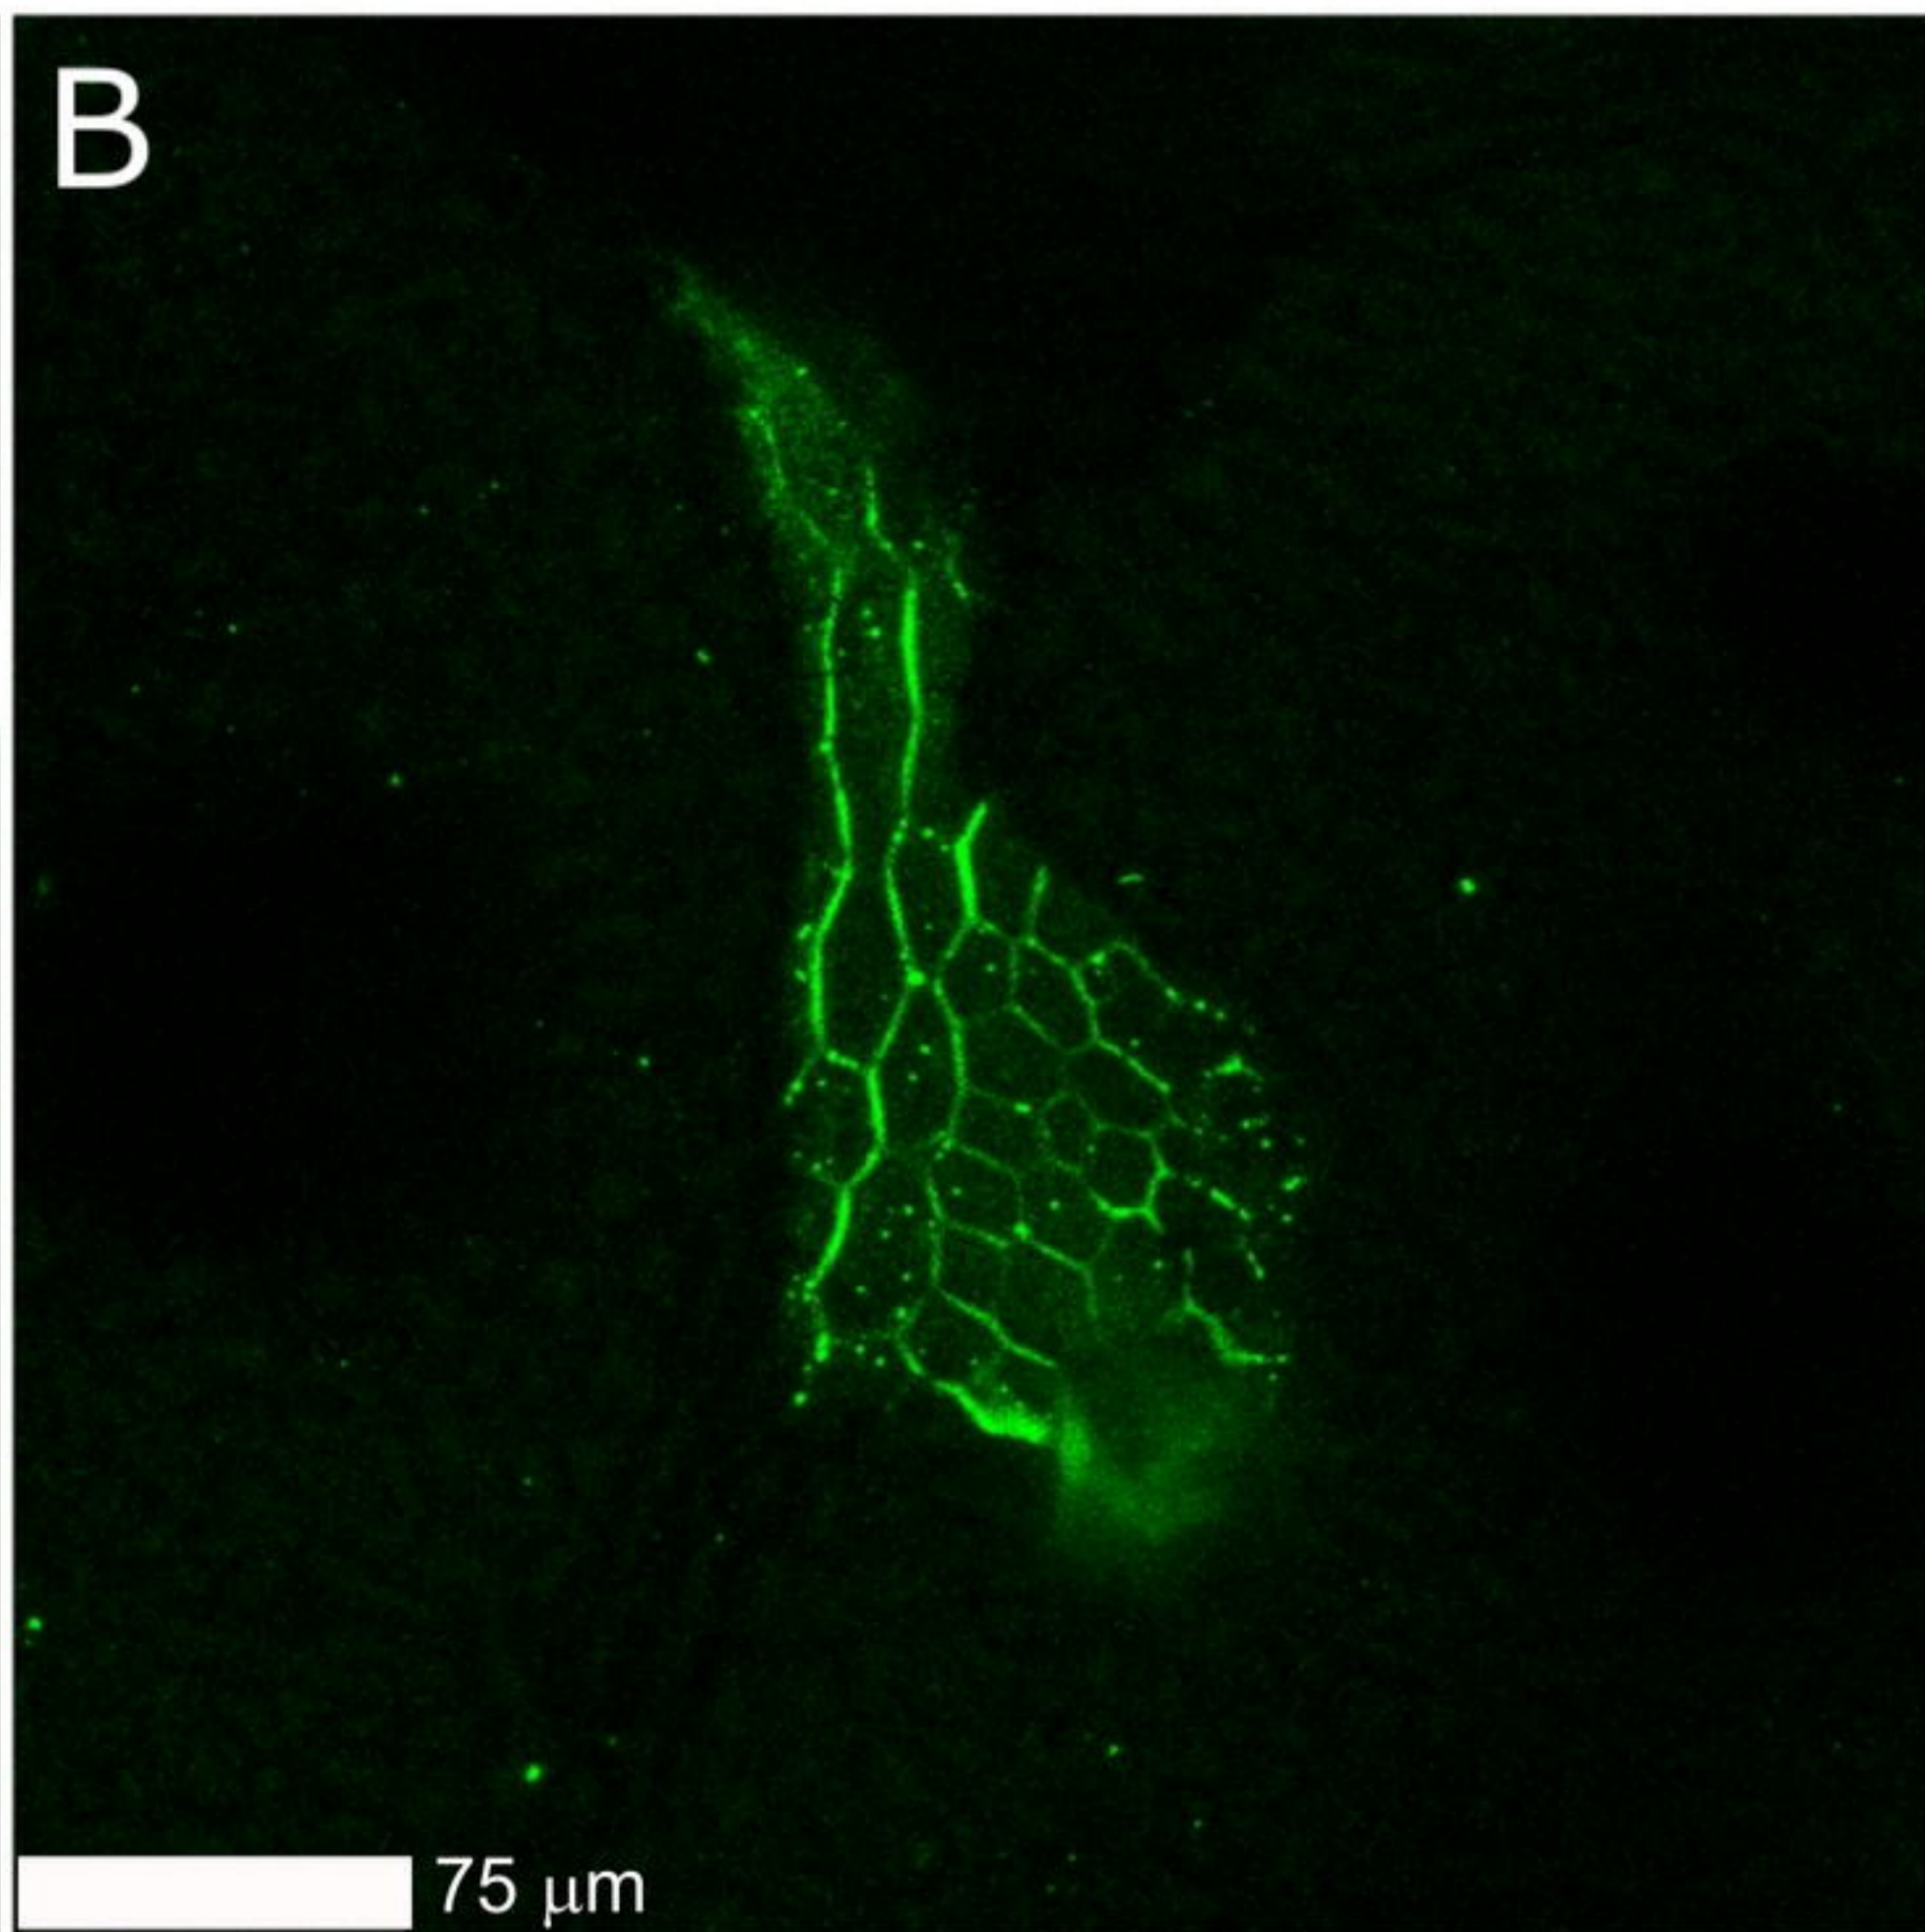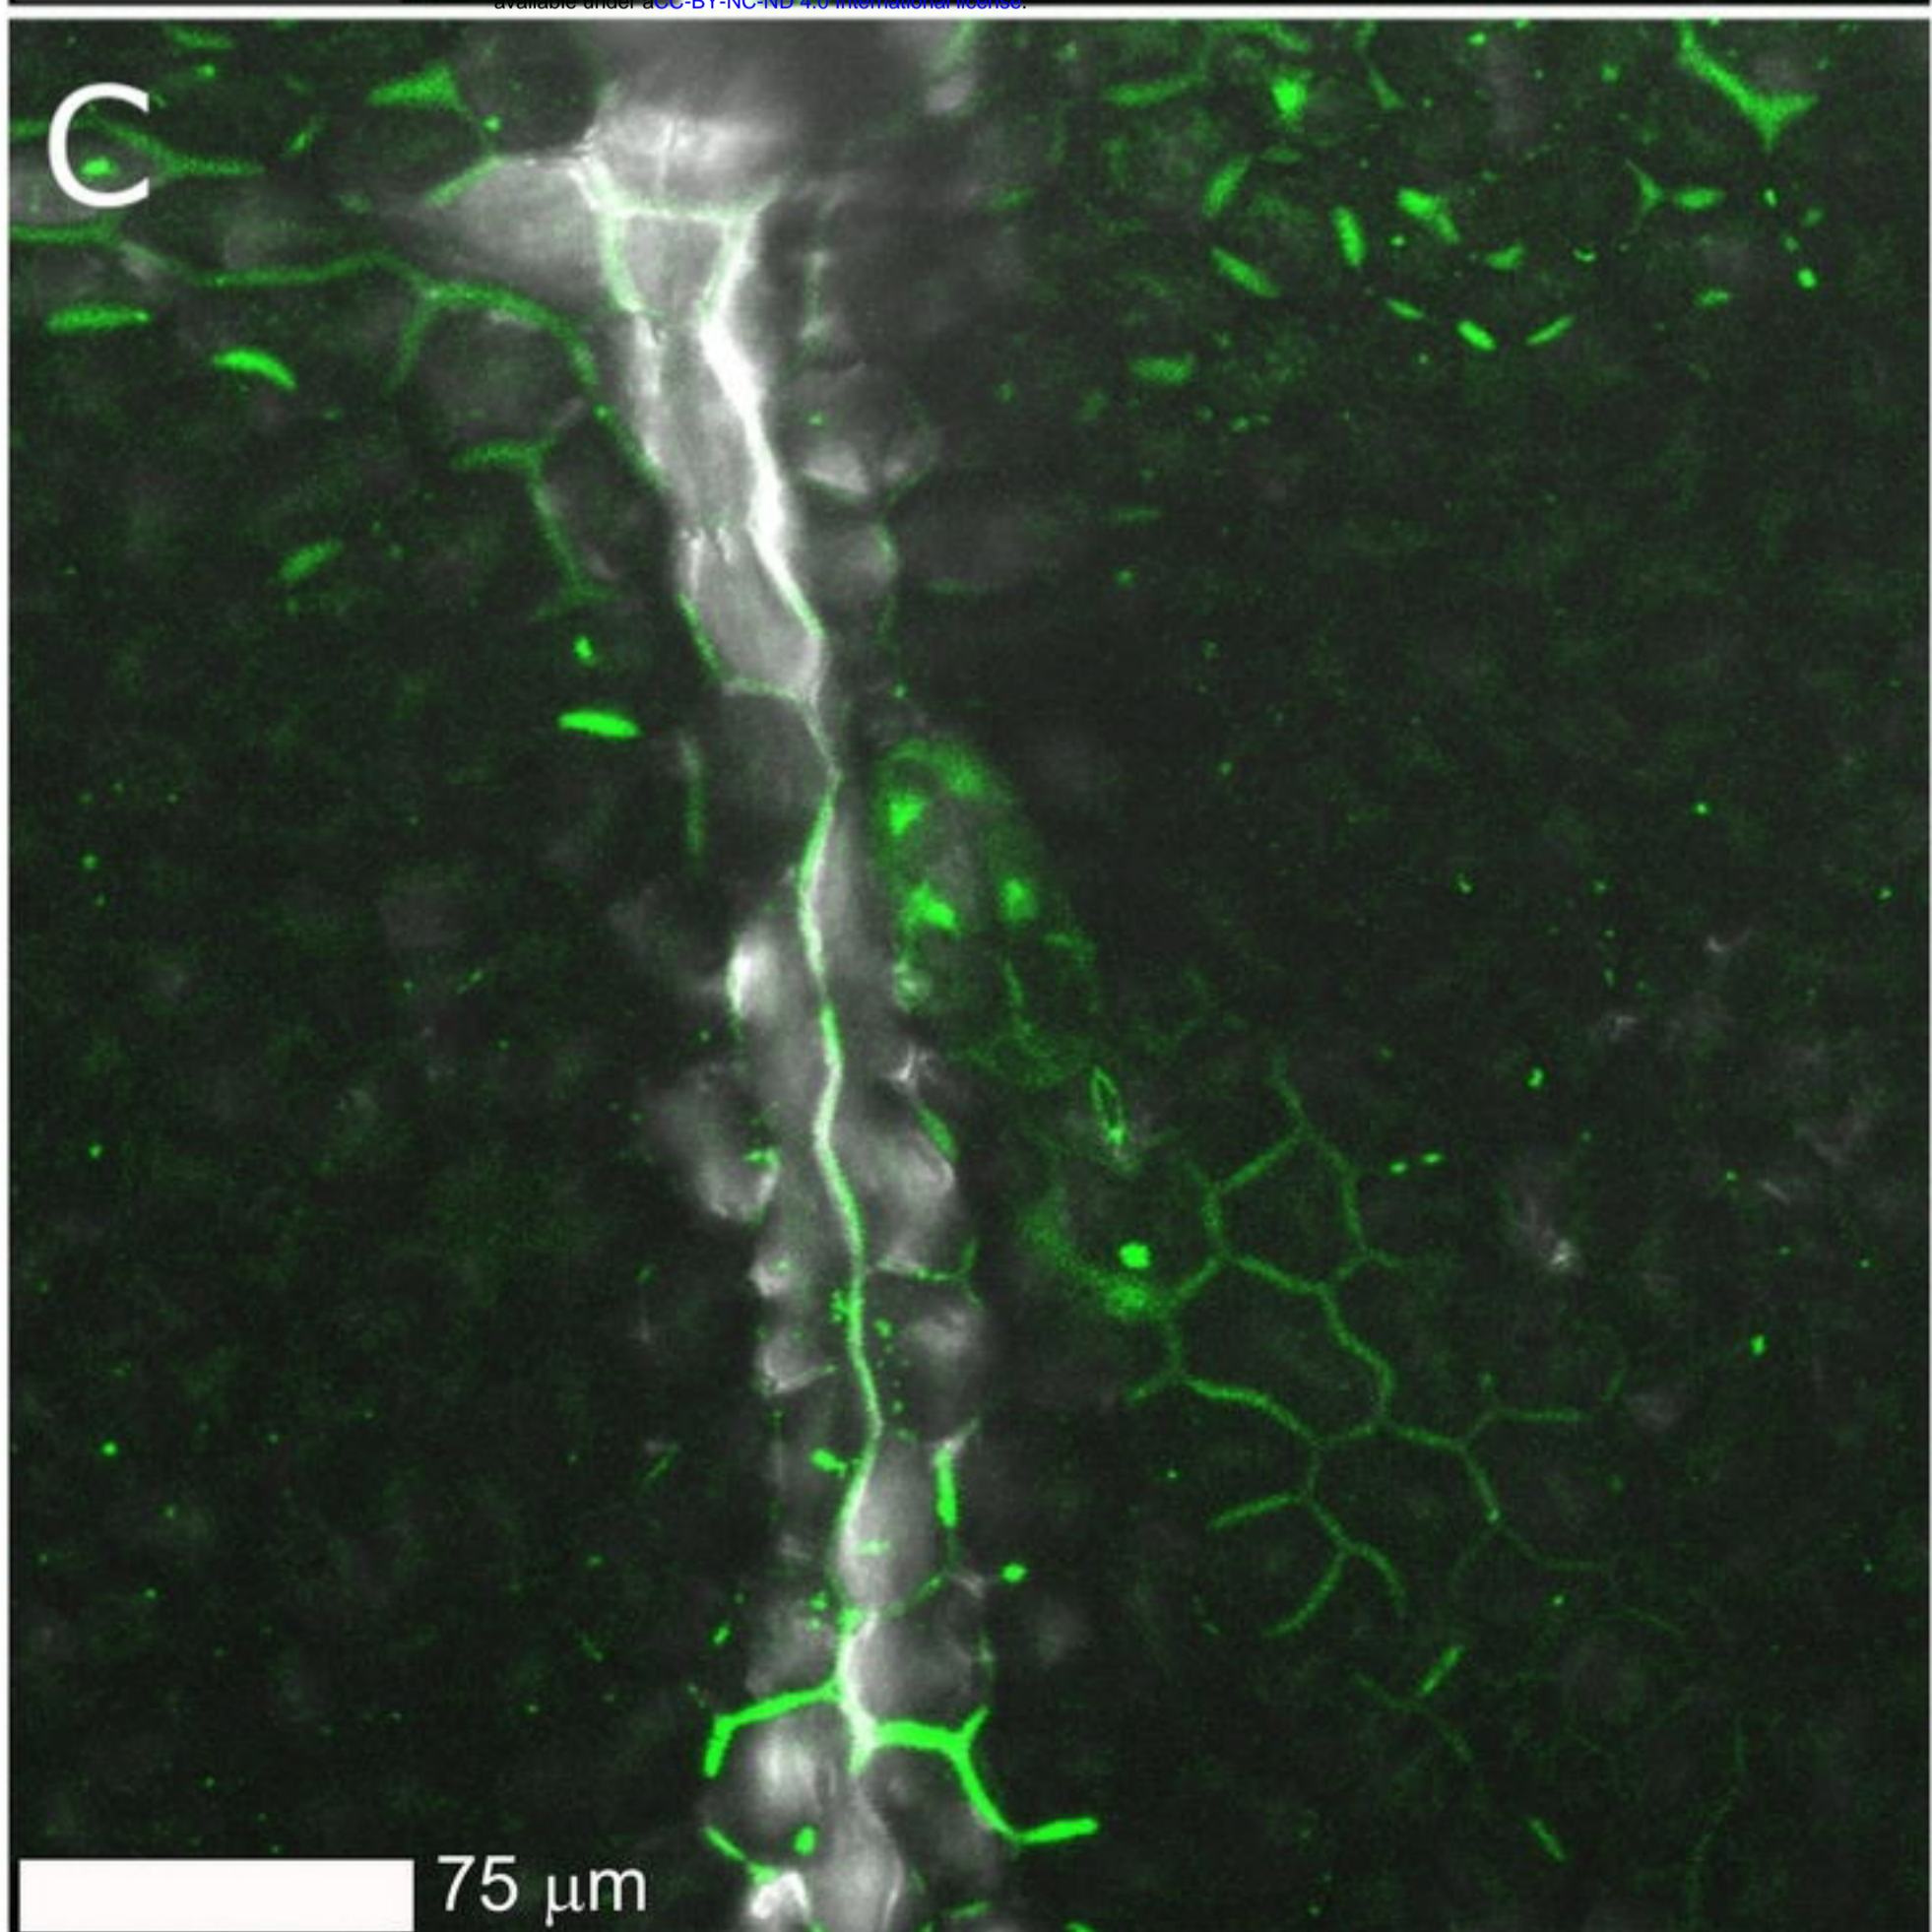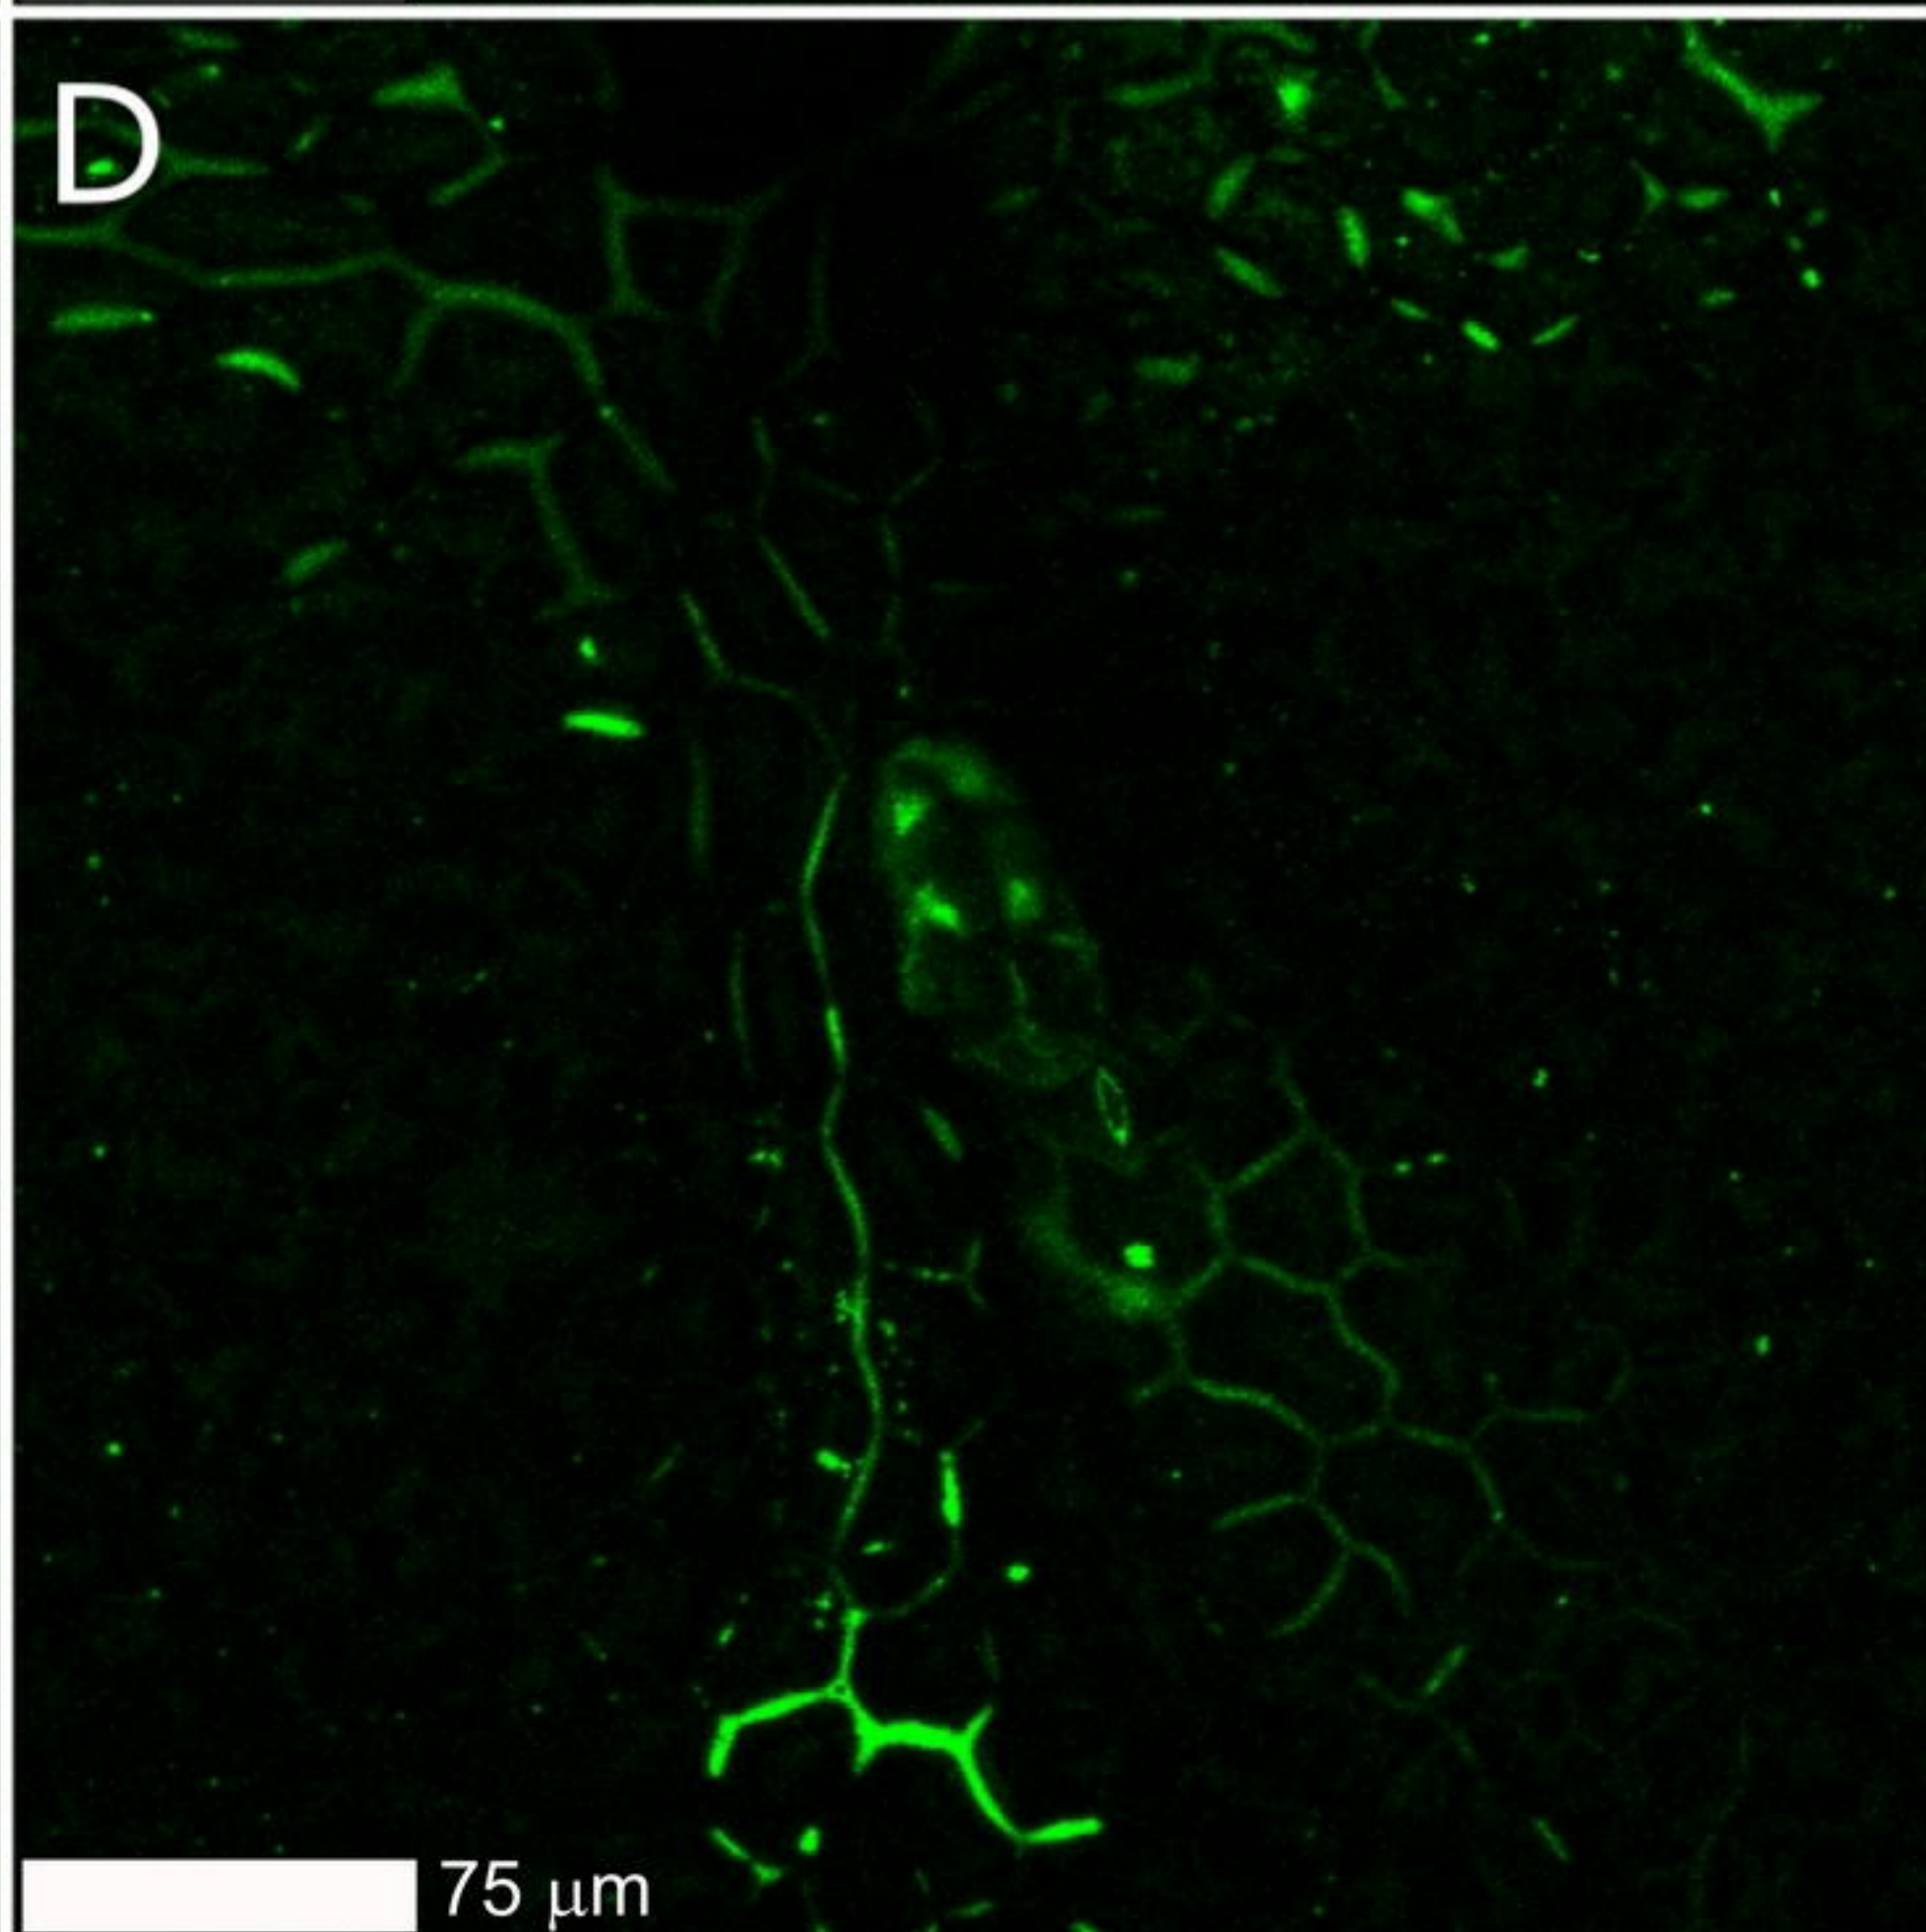

Source: https://www.biorxiv.org/content/10.1101/2022.03.16.484602v1.full.pdf
